# Supplementary material
Source: PubMed Central journal article supplement (PMC8628552)
Supplement: NIHMS1753546-supplement-supplemental_figures.pdf [file NIHMS1753546-supplement-supplemental_figures.pdf]

**Supporting information for:**

**A streamlined data analysis pipeline for the identification of sites of  
citrullination**

Aaron J. Maurais<sup>‡2</sup>, Ari J. Salinger<sup>‡1,2</sup>, Micaela Tobin<sup>1</sup>, Scott A. Shaffer<sup>1,3</sup>, Eranthie  
Weerapana<sup>\*2</sup>, Paul R. Thompson<sup>\*1</sup>

<sup>1</sup>Department of Biochemistry and Molecular Pharmacology, University of Massachusetts  
Medical School, LRB 826, 364 Plantation Street, Worcester, MA 01605, USA.

<sup>2</sup>Department of Chemistry, Boston College, Chestnut Hill, MA 02467, USA.

<sup>3</sup>Mass Spectrometry Facility, University of Massachusetts Medical School, Shrewsbury,  
MA 01545, USA.

<sup>‡</sup>These authors contributed equally to this work

<sup>\*</sup>Corresponding authors; paul.thompson@umassmed.edu, eranthie@bc.edu

Ground truth: true, ionFinder classification: true

Ion type ■ Det ■ Amb ■ DetNL ■ ArtNL

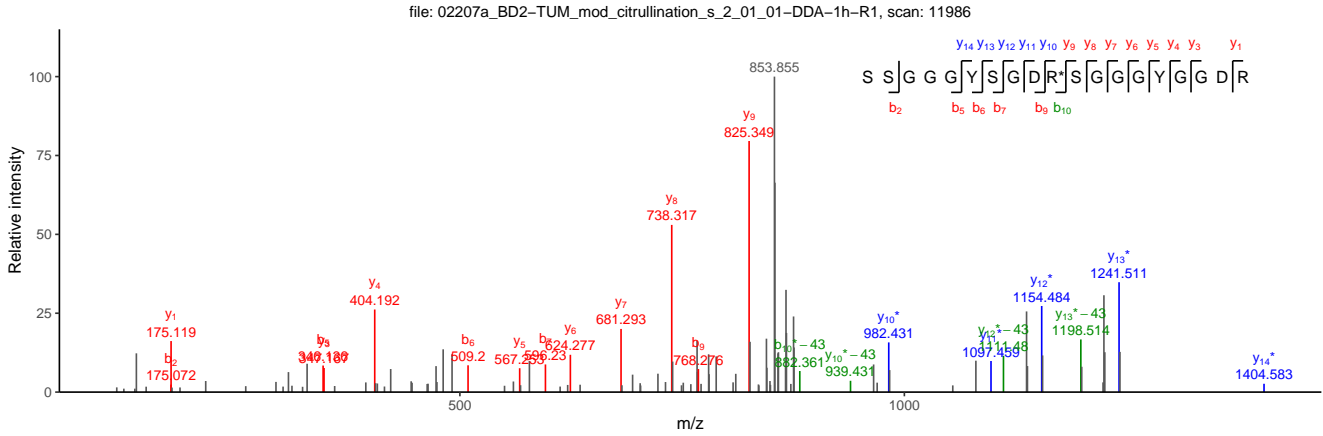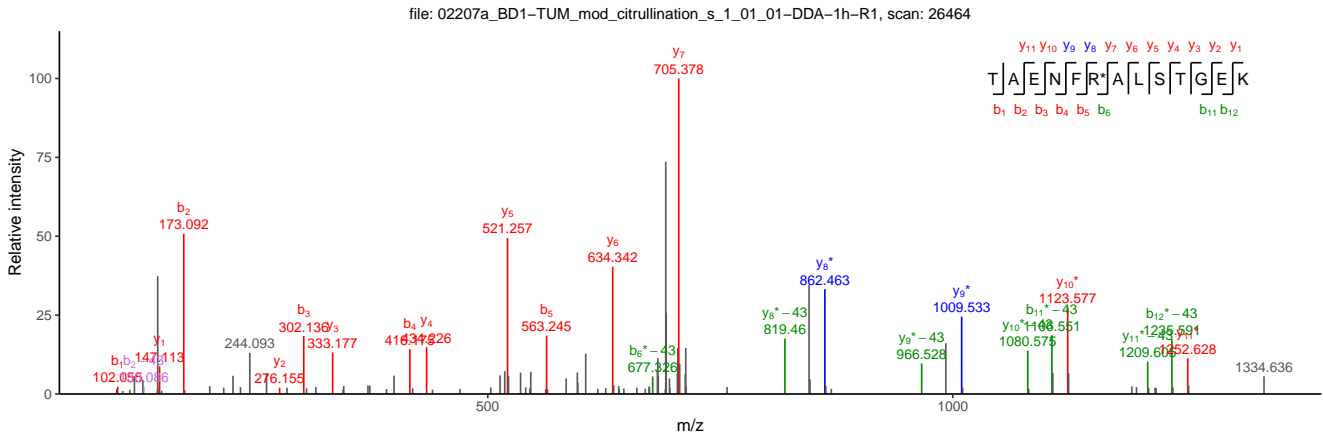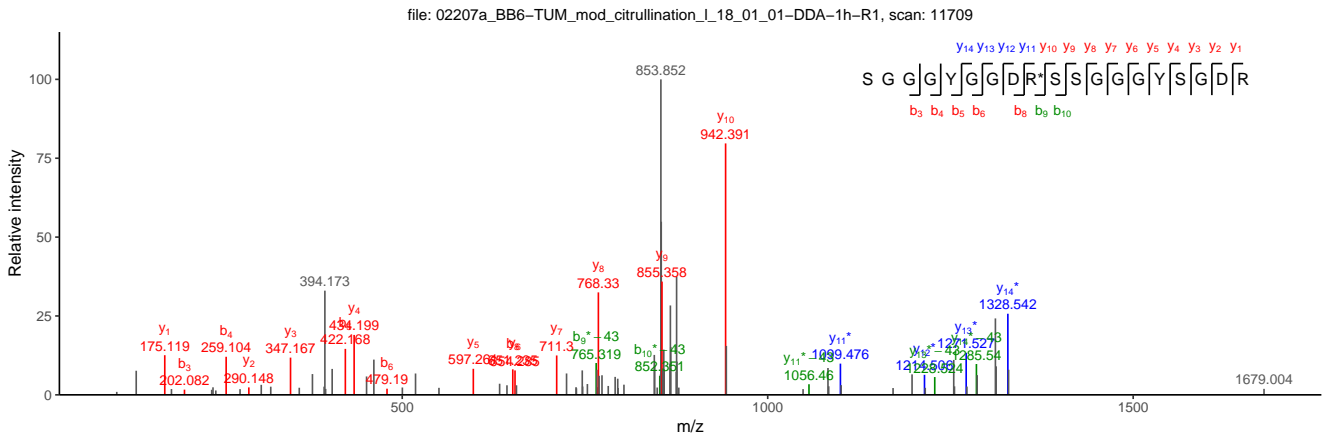

Ground truth: true, ionFinder classification: true

Ion type ■ Det ■ Amb ■ DetNL ■ ArtNL

file: 02207a\_BB1-TUM\_mod\_citrullination\_I\_13\_01\_01-DDA-1h-R1, scan: 12990

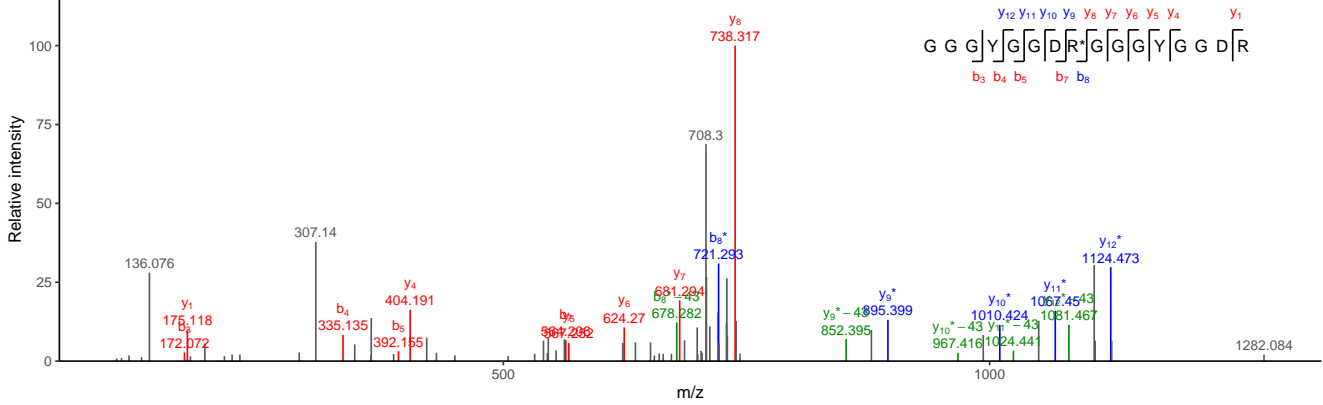

file: 02207a\_BD2-TUM\_mod\_citrullination\_s\_2\_01\_01-DDA-1h-R1, scan: 38470

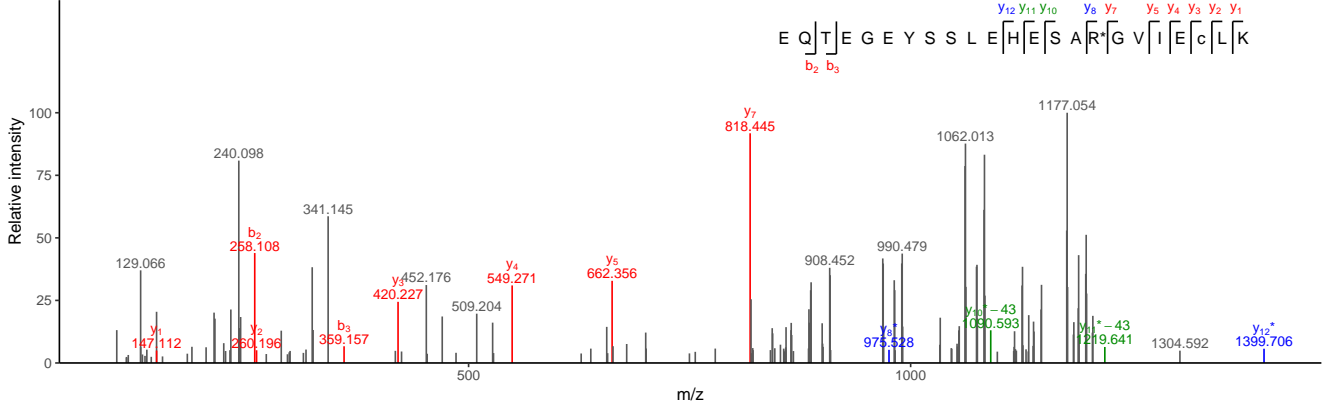

file: 02207a\_BD1-TUM\_mod\_citrullination\_s\_1\_01\_01-DDA-1h-R1, scan: 35805

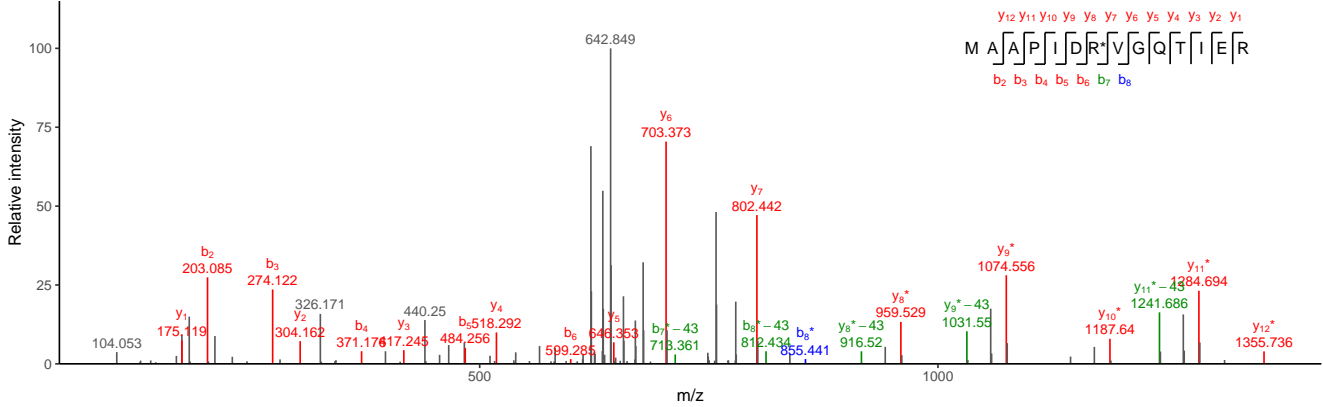

Ground truth: true, ionFinder classification: true

Ion type ■ Det ■ Amb ■ DetNL ■ ArtNL

file: 02207a\_BD1-TUM\_mod\_citrullination\_s\_1\_01\_01-DDA-1h-R1, scan: 42781

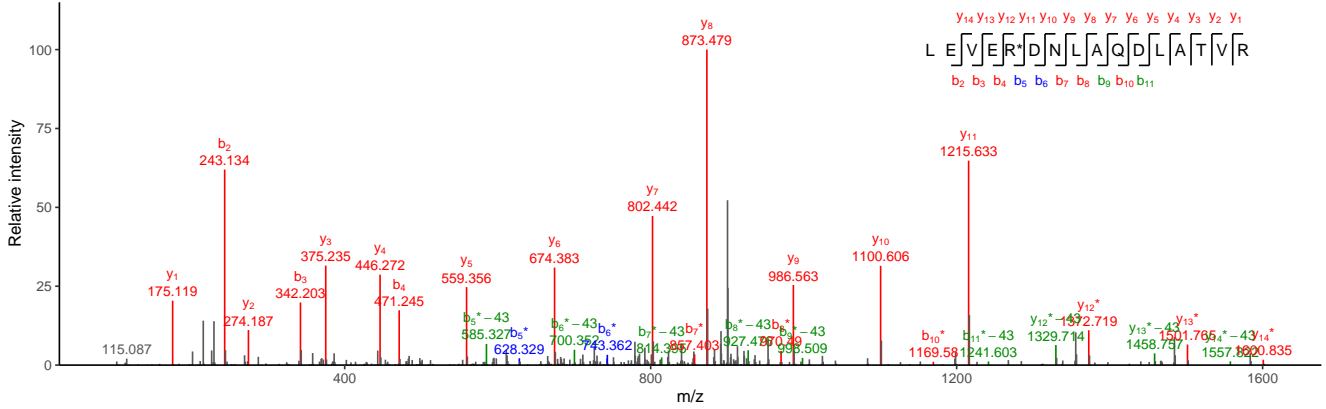

file: 02207a\_BA9-TUM\_mod\_citrullination\_L\_9\_01\_01-DDA-1h-R1, scan: 34873

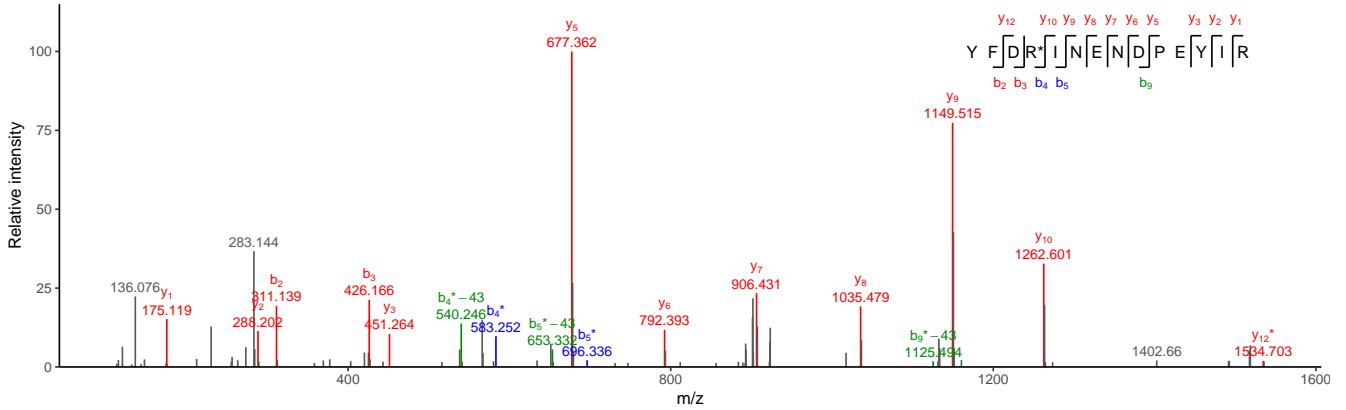

file: 02207a\_BA9-TUM\_mod\_citrullination\_L\_9\_01\_01-DDA-1h-R1, scan: 24354

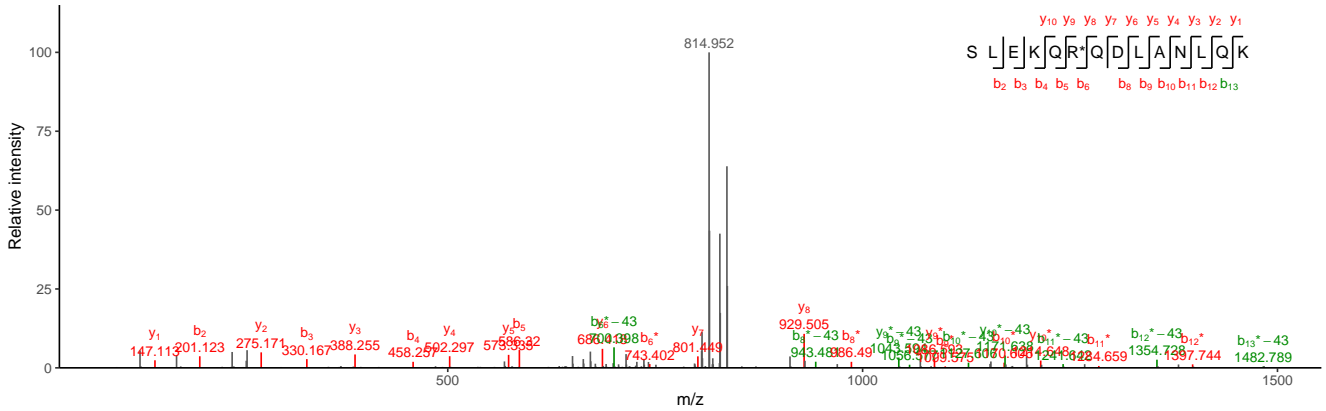

Ground truth: true, ionFinder classification: true

Ion type ■ Det ■ Amb ■ DetNL ■ ArtNL

file: 02207a\_BB6-TUM\_mod\_citrullination\_I\_18\_01\_01-DDA-1h-R1, scan: 45213

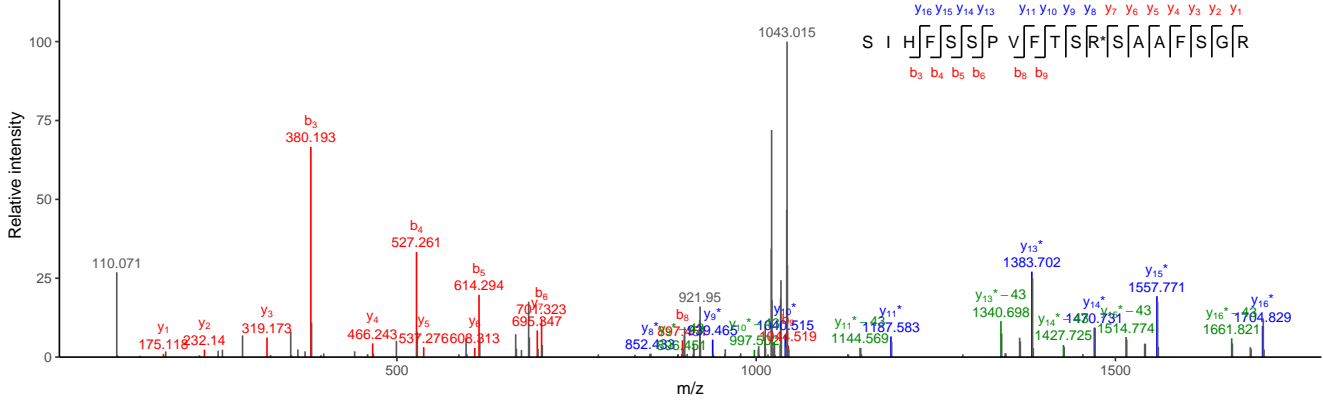

file: 02207a\_BA4-TUM\_mod\_citrullination\_I\_4\_01\_01-DDA-1h-R1, scan: 28509

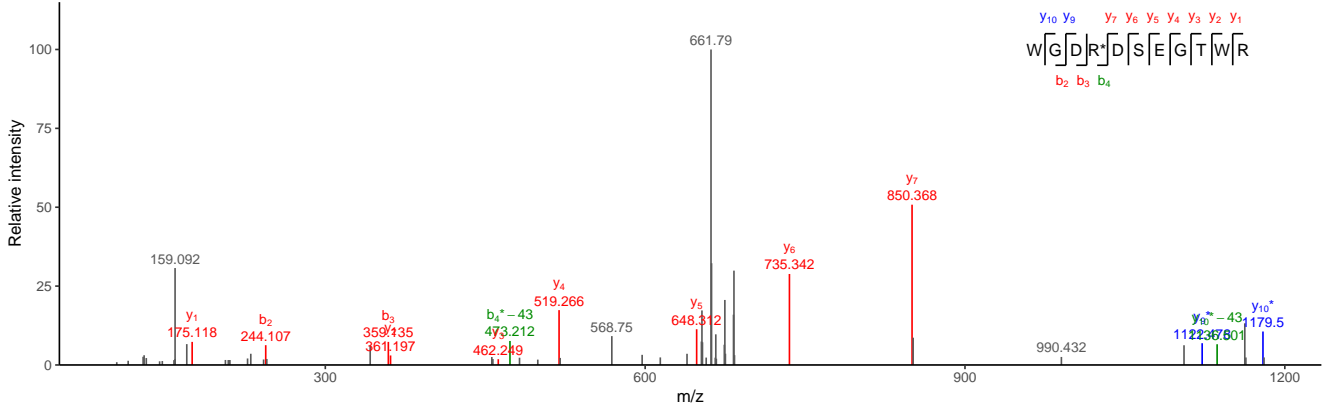

file: 02207a\_BD2-TUM\_mod\_citrullination\_s\_2\_01\_01-DDA-1h-R1, scan: 40271

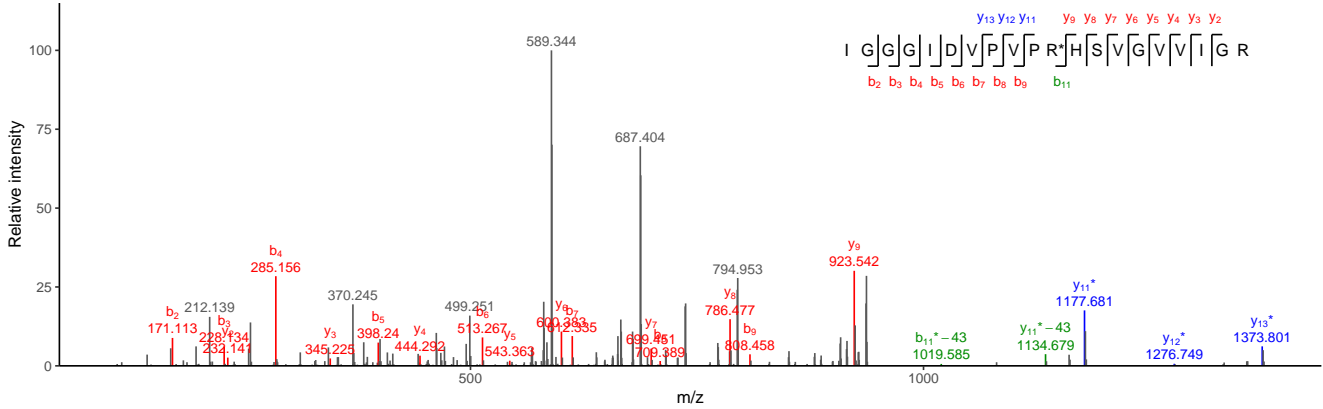

Ground truth: true, ionFinder classification: true

Ion type ■ Det ■ Amb ■ DetNL ■ ArtNL

file: 02207a\_BB4-TUM\_mod\_citrullination\_I\_16\_01\_01-DDA-1h-R1, scan: 24935

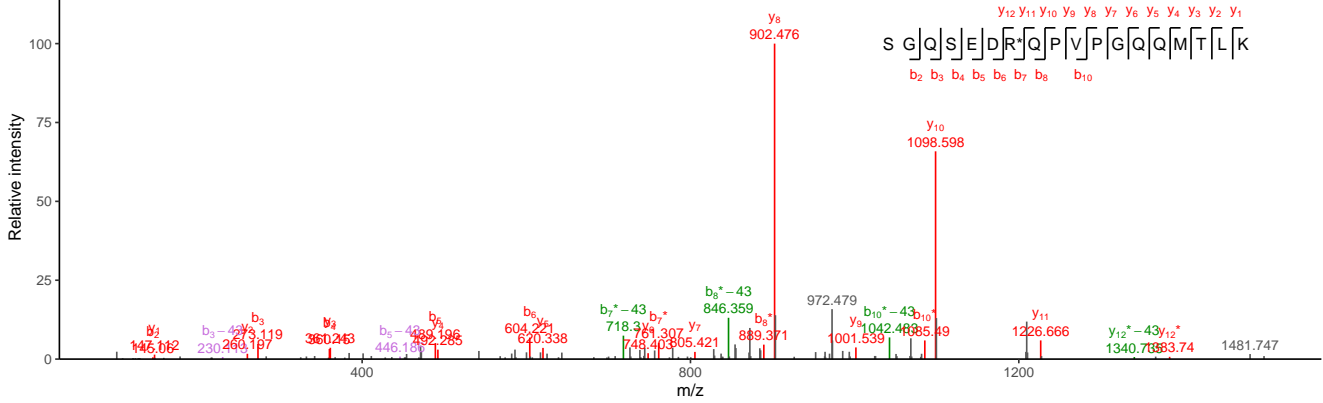

file: 02207a\_BA8-TUM\_mod\_citrullination\_I\_8\_01\_01-DDA-1h-R1, scan: 17957

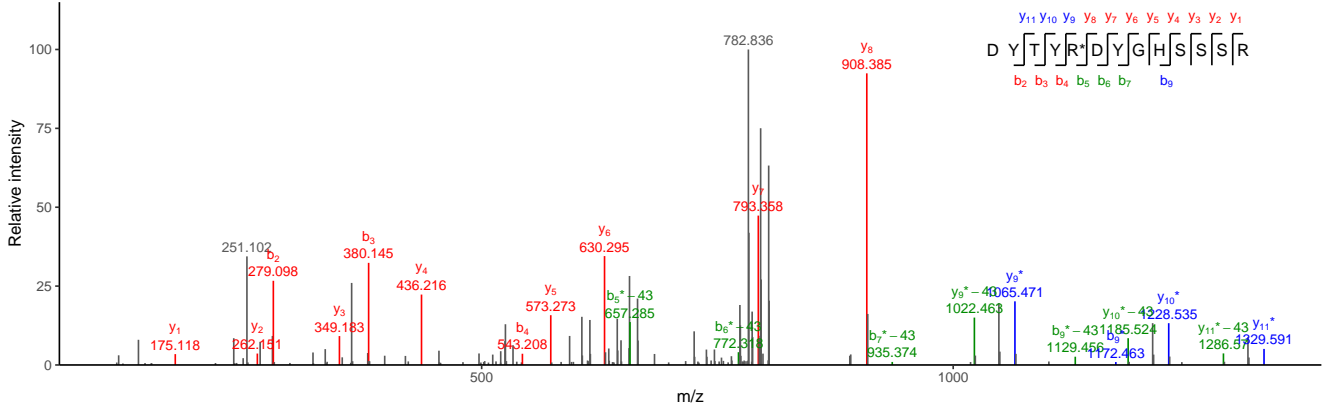

file: 02207a\_BB5-TUM\_mod\_citrullination\_I\_17\_01\_01-DDA-1h-R1, scan: 10841

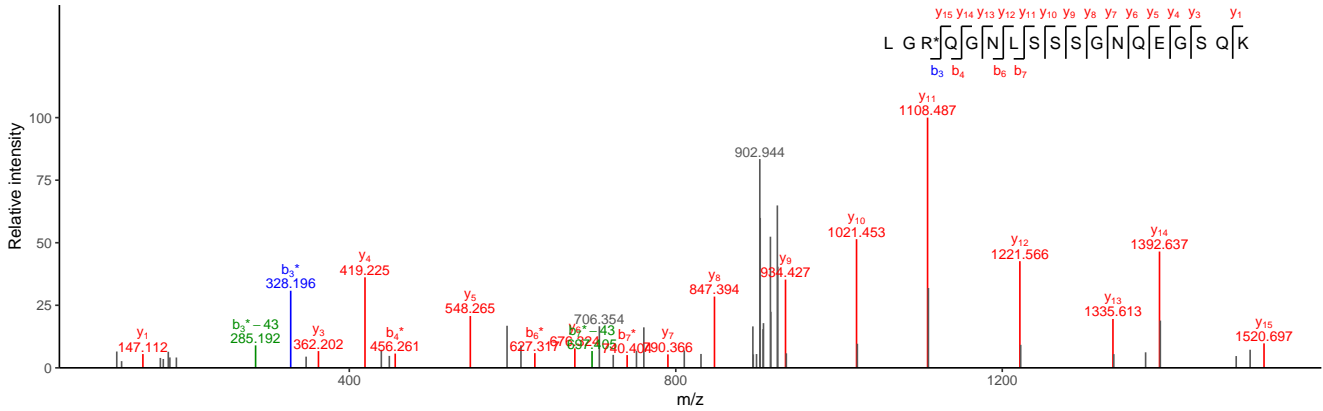

Ground truth: true, ionFinder classification: true

Ion type ■ Det ■ Amb ■ DetNL ■ ArtNL

file: 02207a\_BA8-TUM\_mod\_citrullination\_I\_8\_01\_01-DDA-1h-R1, scan: 18102

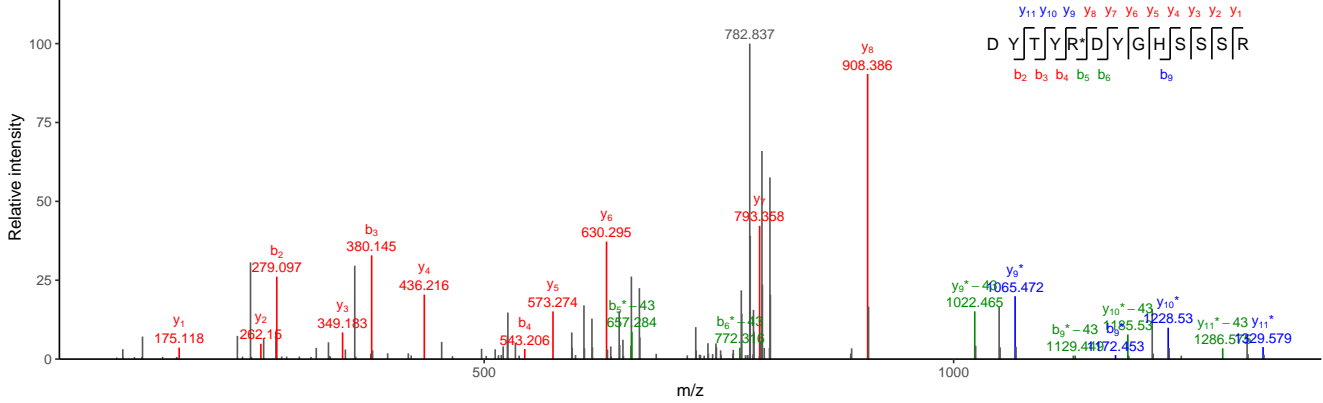

file: 02207a\_BB4-TUM\_mod\_citrullination\_I\_16\_01\_01-DDA-1h-R1, scan: 11694

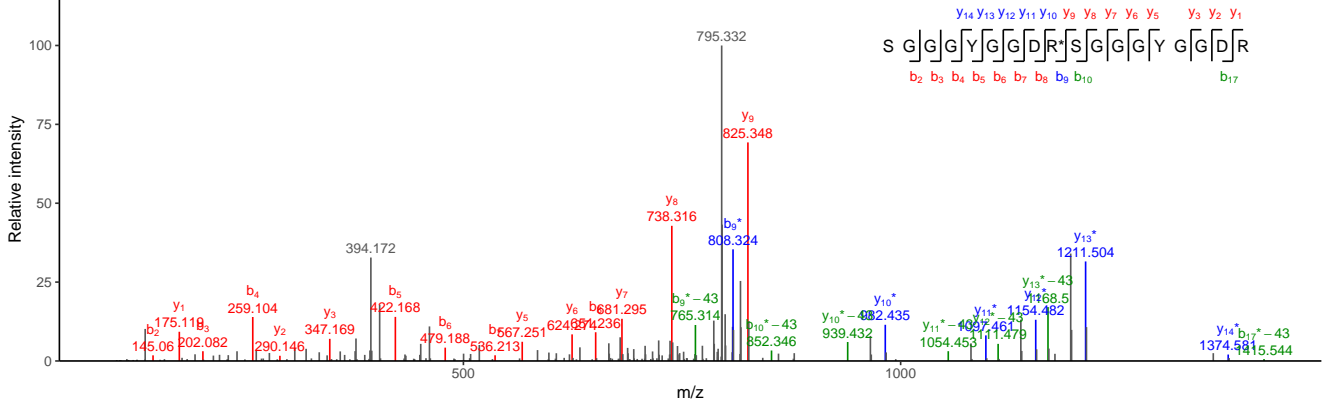

file: 02207a\_BB6-TUM\_mod\_citrullination\_I\_18\_01\_01-DDA-1h-R1, scan: 43341

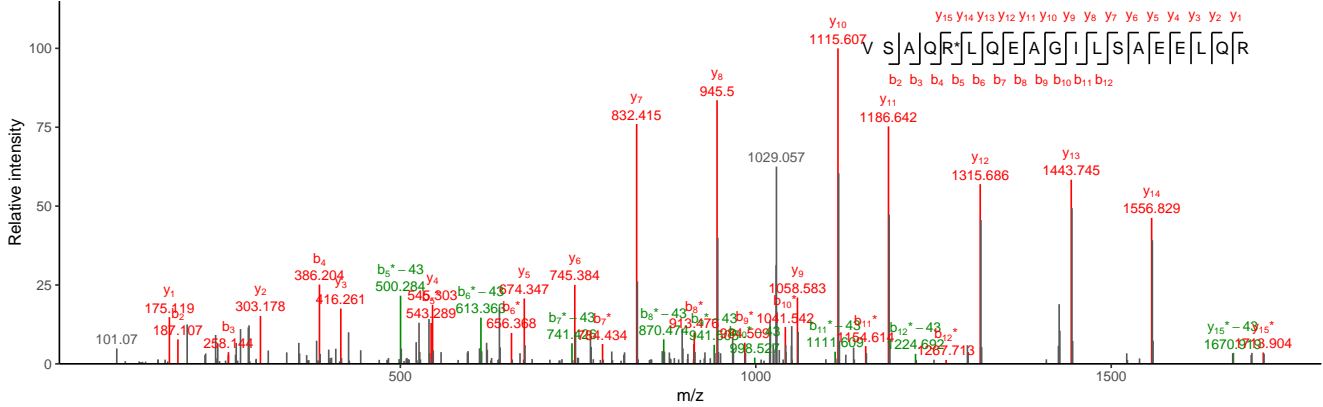

Ground truth: true, ionFinder classification: true

Ion type ■ Det ■ Amb ■ DetNL ■ ArtNL

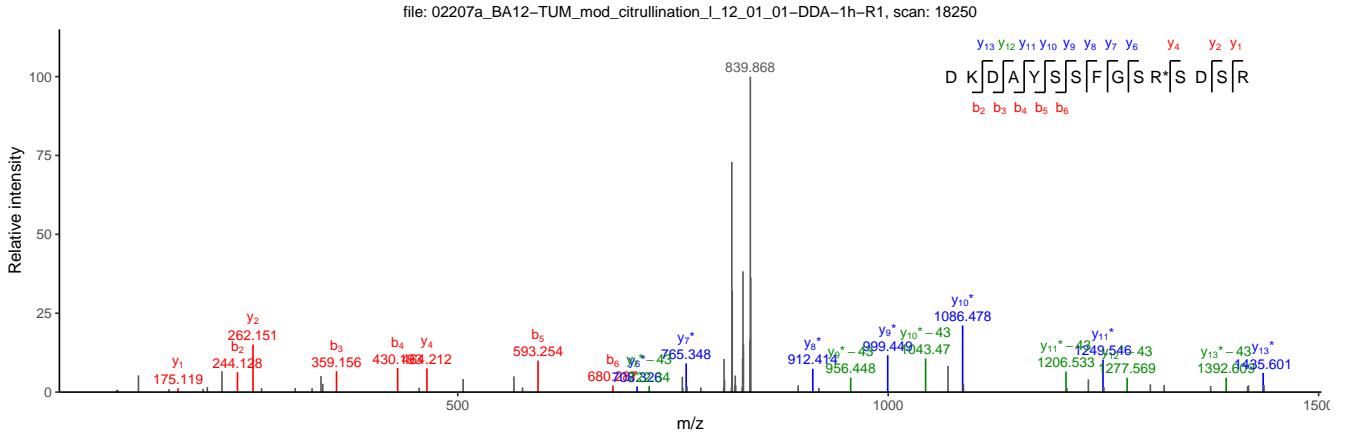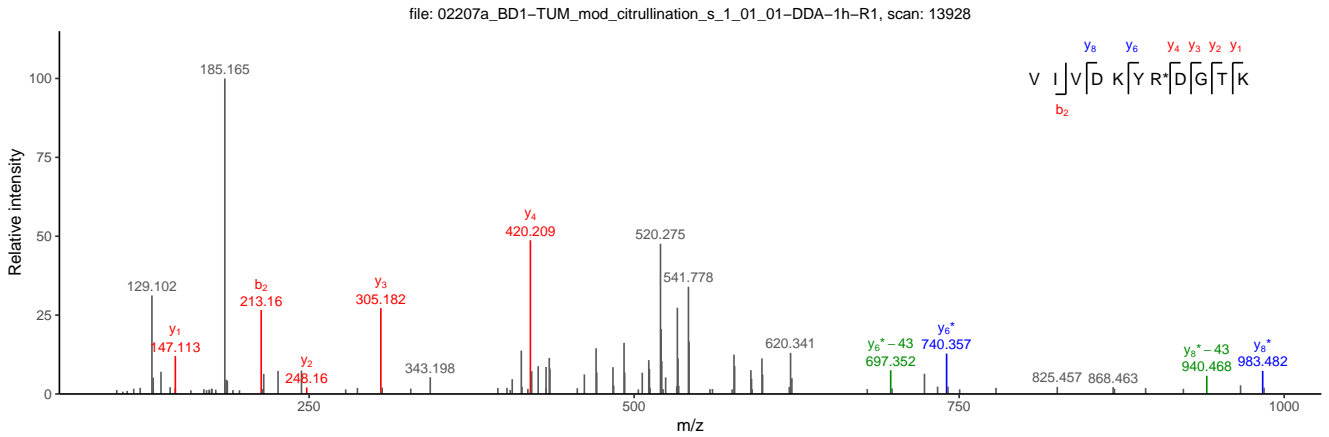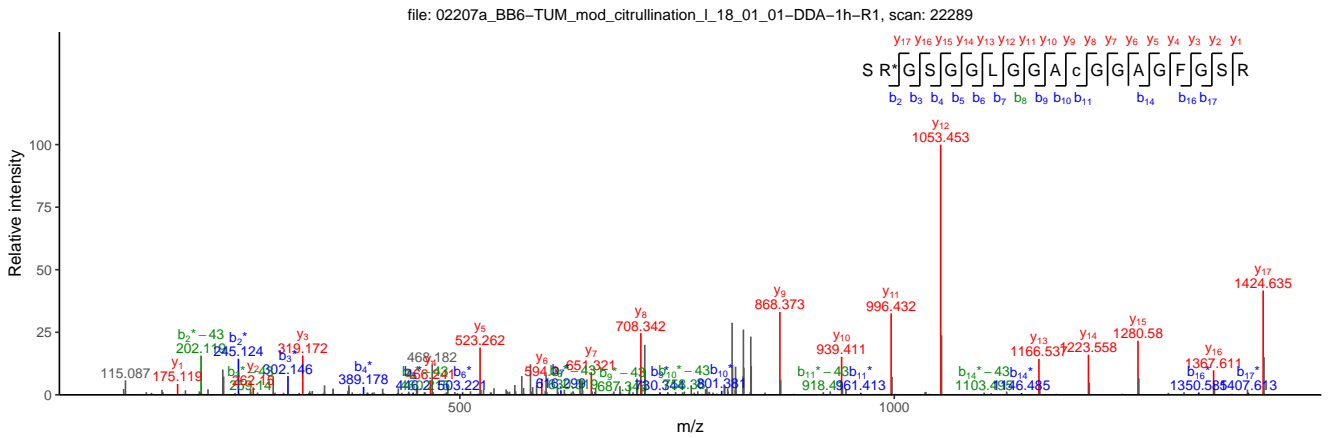



Ground truth: true, ionFinder classification: true

Ion type ■ Det ■ Amb ■ DetNL ■ ArtNL

file: 02207a\_BA5-TUM\_mod\_citrullination\_L\_5\_01\_01-DDA-1h-R1, scan: 25825

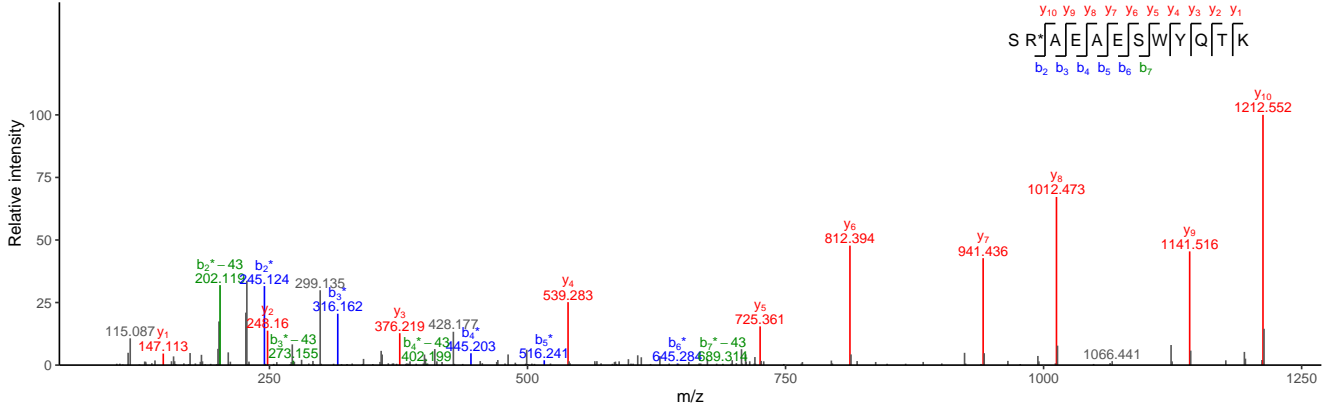

file: 02207a\_BD1-TUM\_mod\_citrullination\_s\_1\_01\_01-DDA-1h-R1, scan: 35879

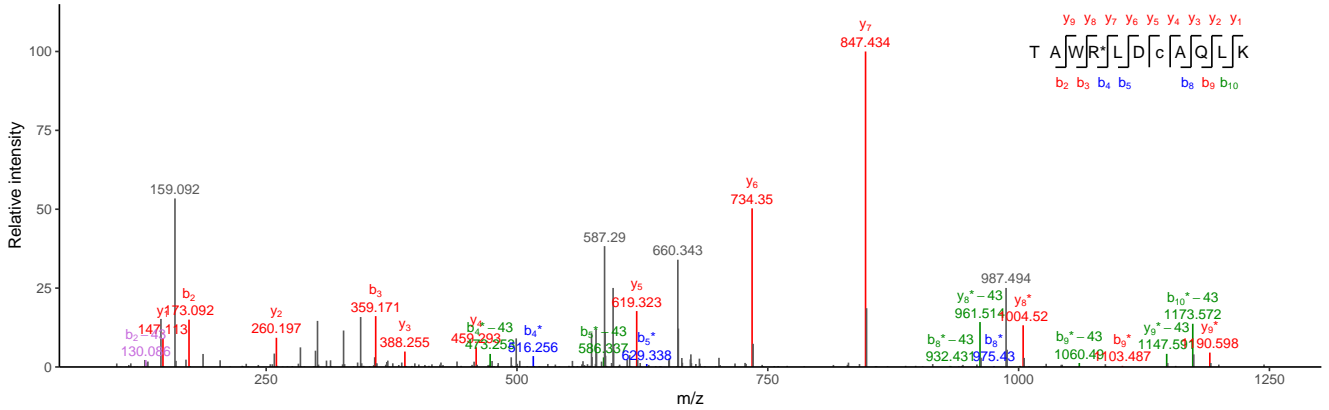

file: 02207a\_BB2-TUM\_mod\_citrullination\_L\_14\_01\_01-DDA-1h-R1, scan: 28335

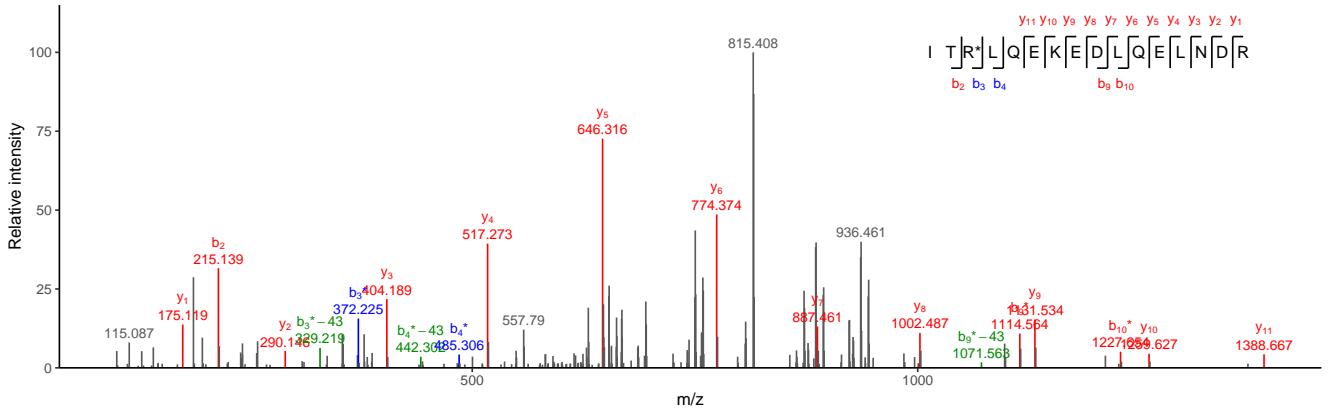

Ground truth: true, ionFinder classification: true

Ion type ■ Det ■ Amb ■ DetNL ■ ArtNL

file: 02207a\_BB2-TUM\_mod\_citrullination\_L14\_01\_01-DDA-1h-R1, scan: 31930

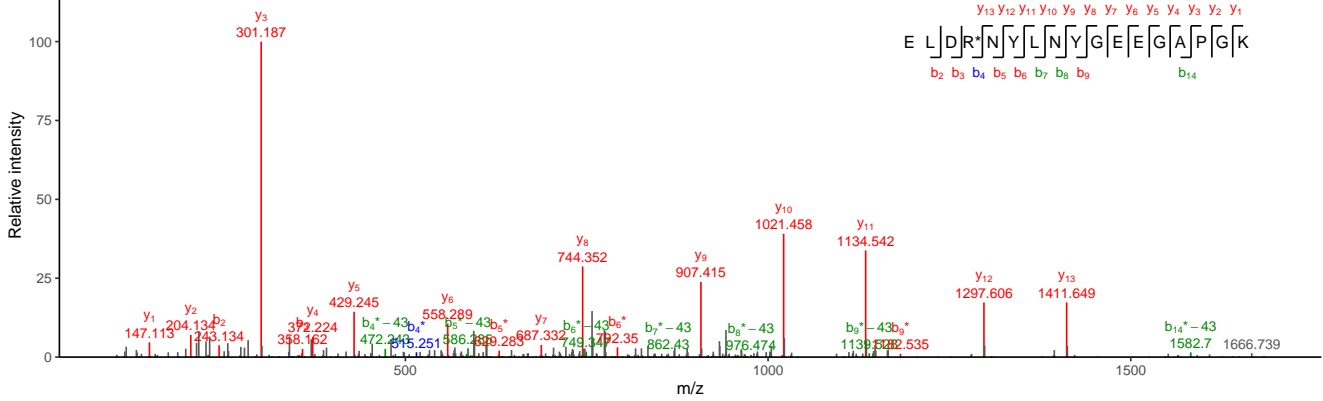

file: 02207a\_BD1-TUM\_mod\_citrullination\_s1\_01\_01-DDA-1h-R1, scan: 14464

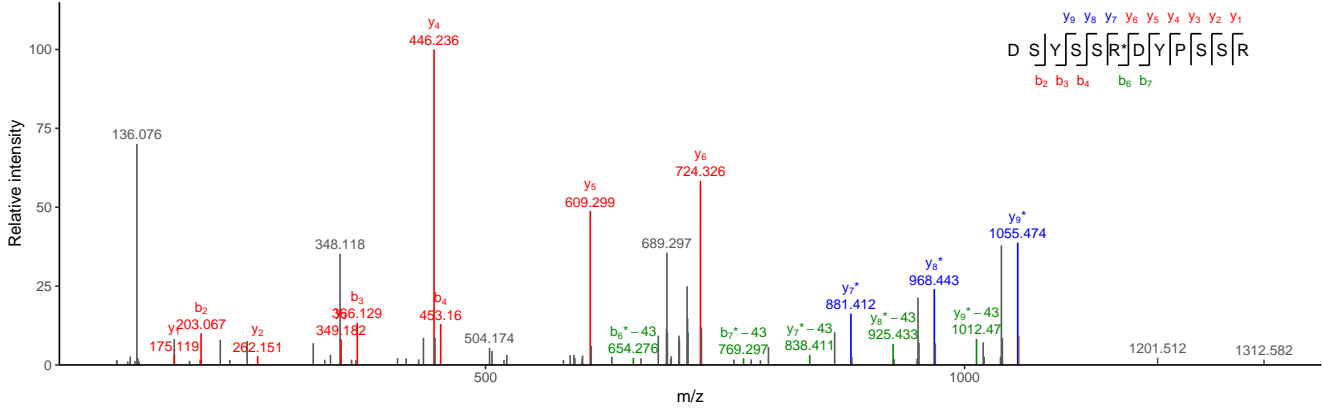

file: 02207a\_BD1-TUM\_mod\_citrullination\_s1\_01\_01-DDA-1h-R1, scan: 25997

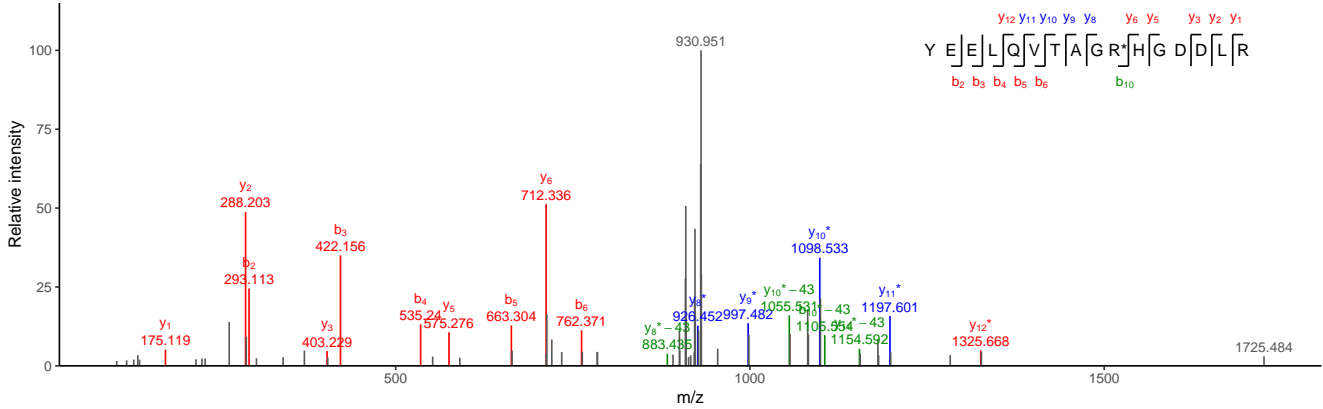

Ground truth: true, ionFinder classification: true

Ion type ■ Det ■ Amb ■ DetNL ■ ArtNL

file: 02207a\_BD1-TUM\_mod\_citrullination\_s\_1\_01\_01-DDA-1h-R1, scan: 17850

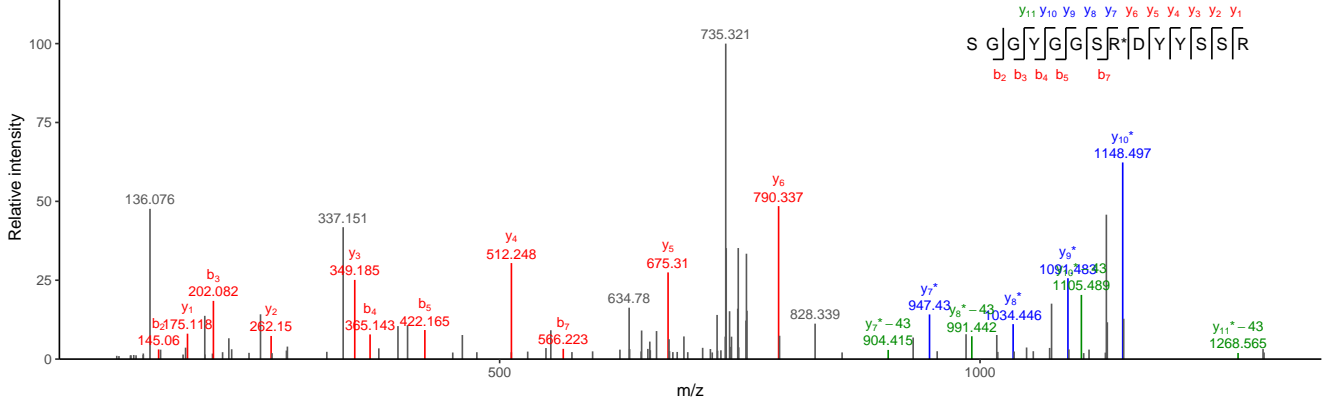

file: 02207a\_BA2-TUM\_mod\_citrullination\_L\_2\_01\_01-DDA-1h-R1, scan: 21011

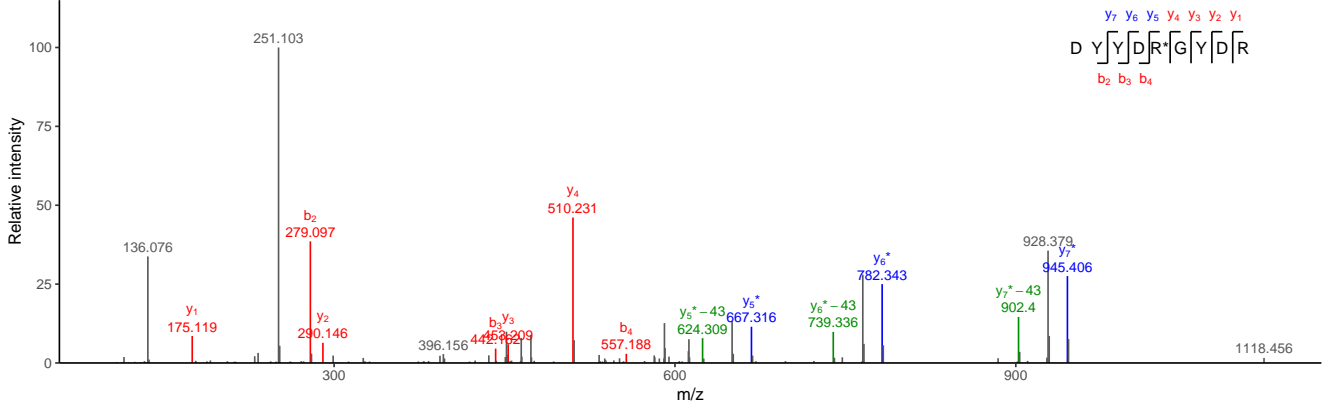

file: 02207a\_BD1-TUM\_mod\_citrullination\_s\_1\_01\_01-DDA-1h-R1, scan: 10900

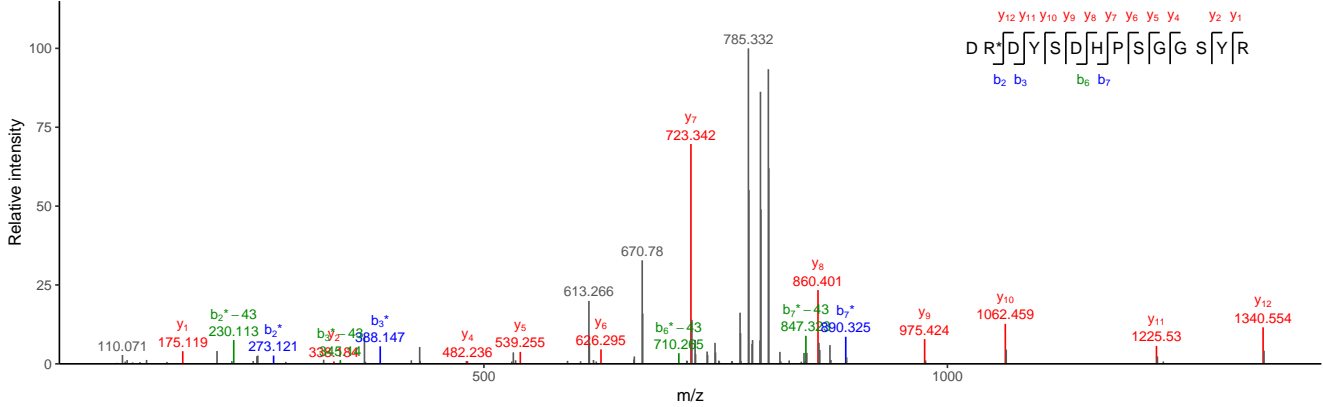

Ground truth: true, ionFinder classification: true

Ion type ■ Det ■ Amb ■ DetNL ■ ArtNL

file: 02207a\_BA7-TUM\_mod\_citrullination\_L\_7\_01\_01-DDA-1h-R1, scan: 10670

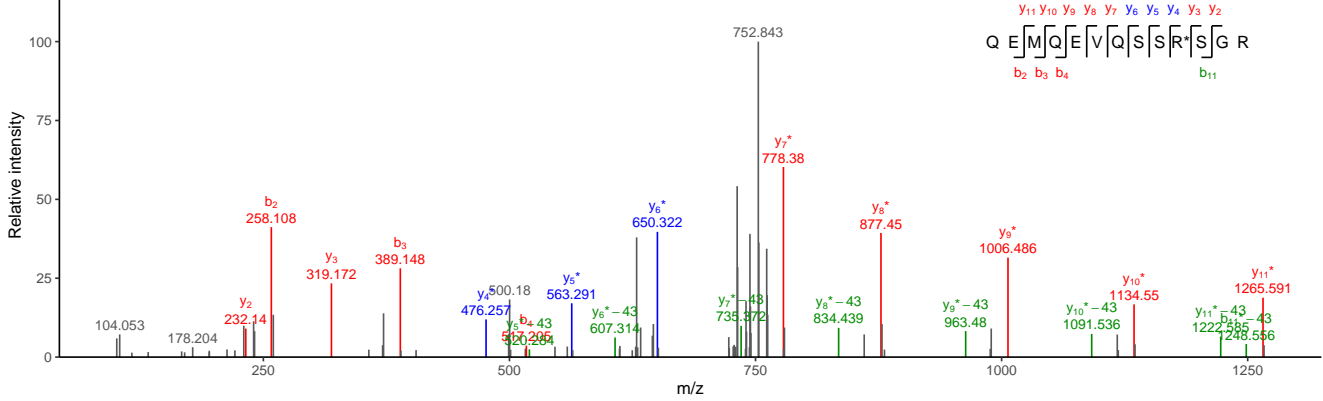

file: 02207a\_BA10-TUM\_mod\_citrullination\_L\_10\_01\_01-DDA-1h-R1, scan: 15436

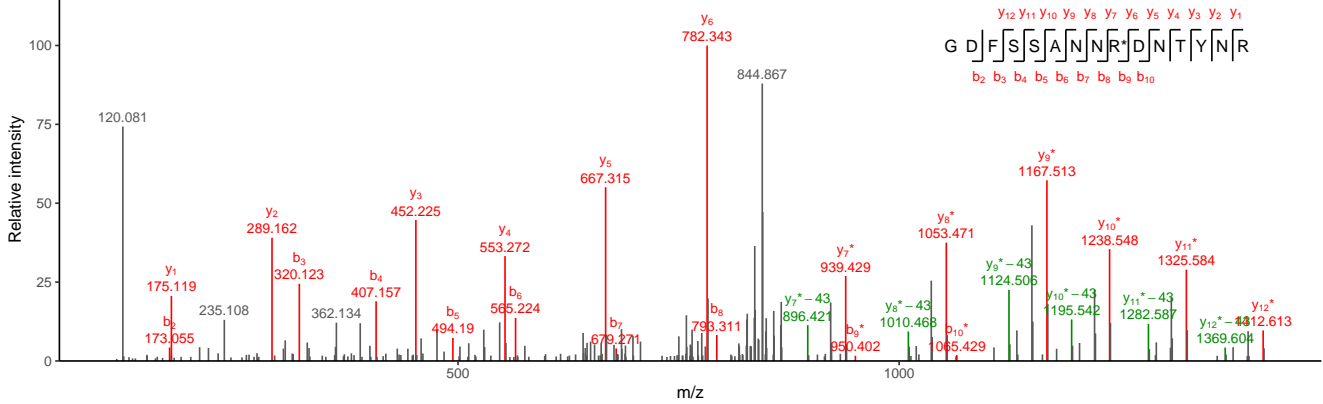

file: 02207a\_BD2-TUM\_mod\_citrullination\_s\_2\_01\_01-DDA-1h-R1, scan: 54701

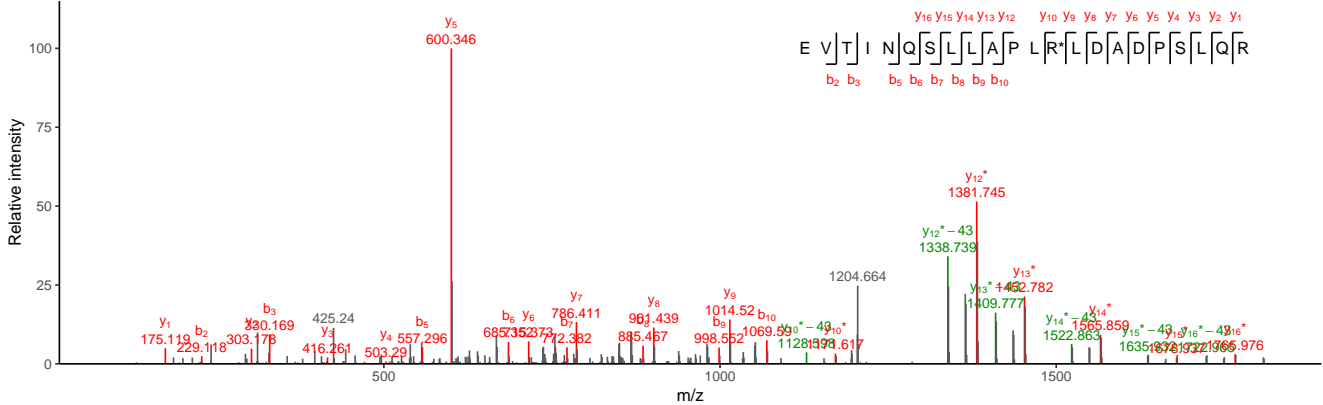

Ground truth: true, ionFinder classification: true

Ion type ■ Det ■ Amb ■ DetNL ■ ArtNL

file: 02207a\_BB6-TUM\_mod\_citrullination\_I\_18\_01\_01-DDA-1h-R1, scan: 38875

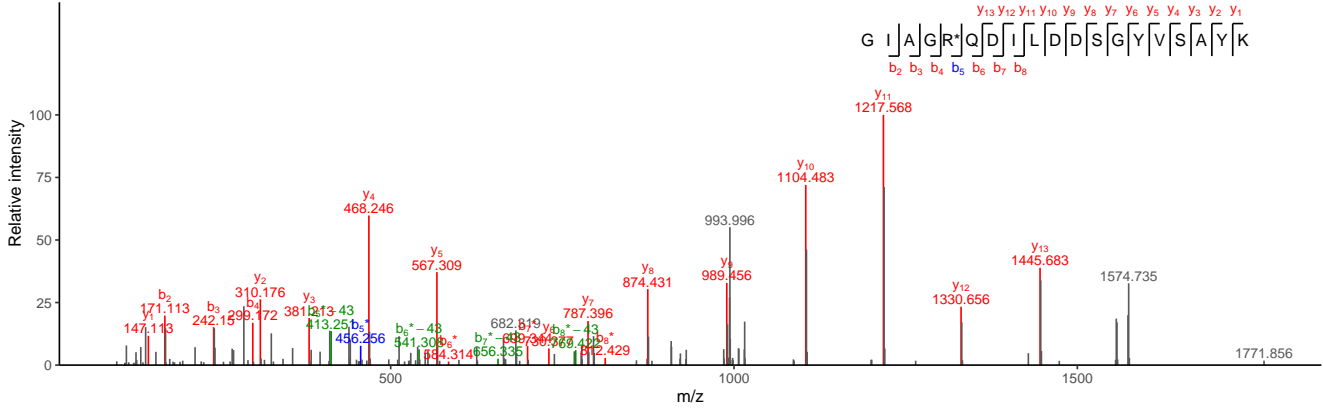

file: 02207a\_BA12-TUM\_mod\_citrullination\_I\_12\_01\_01-DDA-1h-R1, scan: 53722

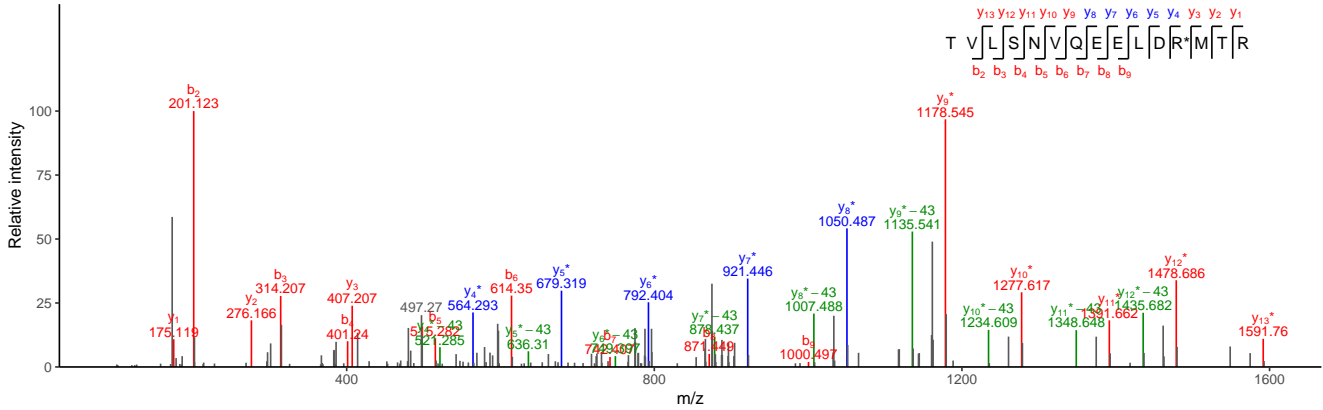

file: 02207a\_BB1-TUM\_mod\_citrullination\_I\_13\_01\_01-DDA-1h-R1, scan: 6579

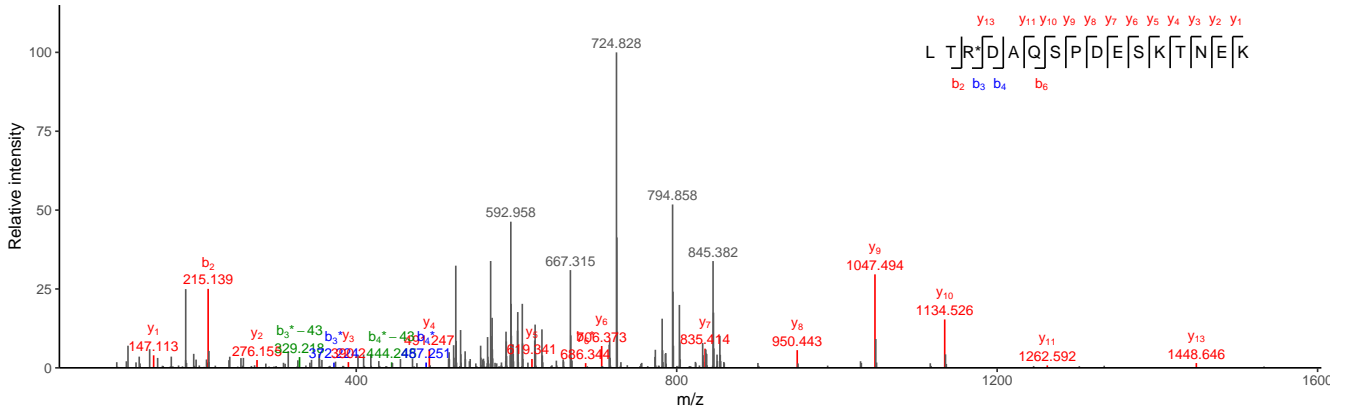

Ground truth: true, ionFinder classification: true

Ion type ■ Det ■ Amb ■ DetNL ■ ArtNL

file: 02207a\_BD1-TUM\_mod\_citrullination\_s\_1\_01\_01-DDA-1h-R1, scan: 32606

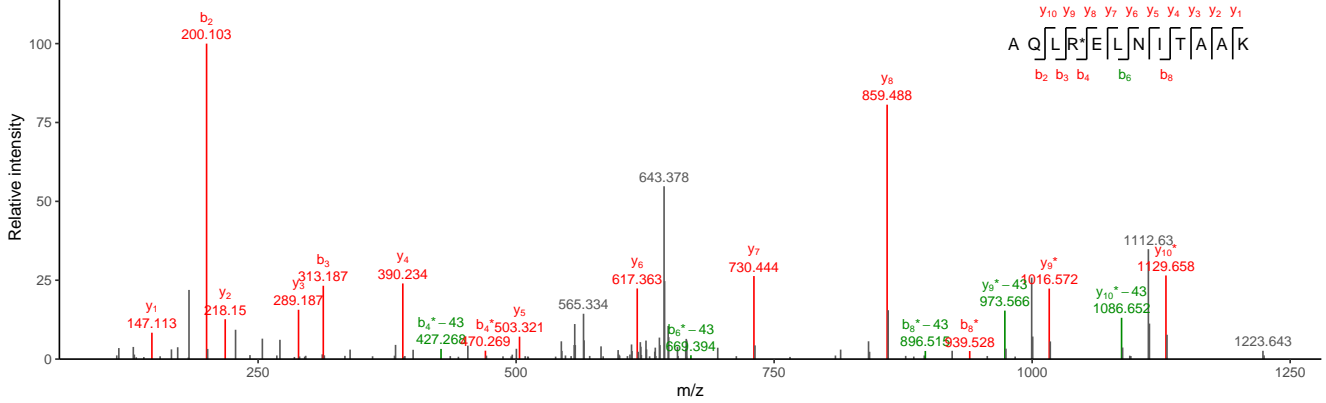

file: 02207a\_BB1-TUM\_mod\_citrullination\_l\_13\_01\_01-DDA-1h-R1, scan: 30672

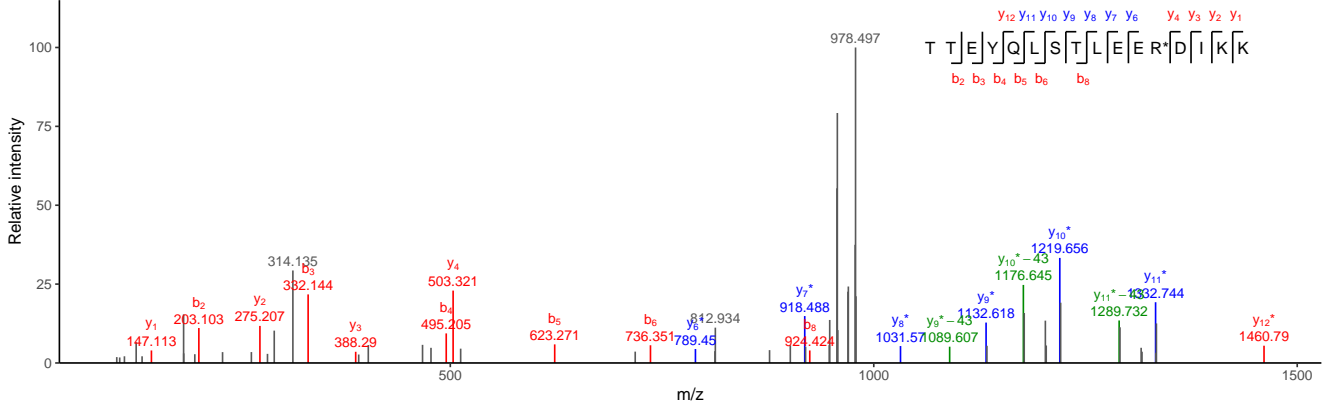

file: 02207a\_BB1-TUM\_mod\_citrullination\_l\_13\_01\_01-DDA-1h-R1, scan: 17335

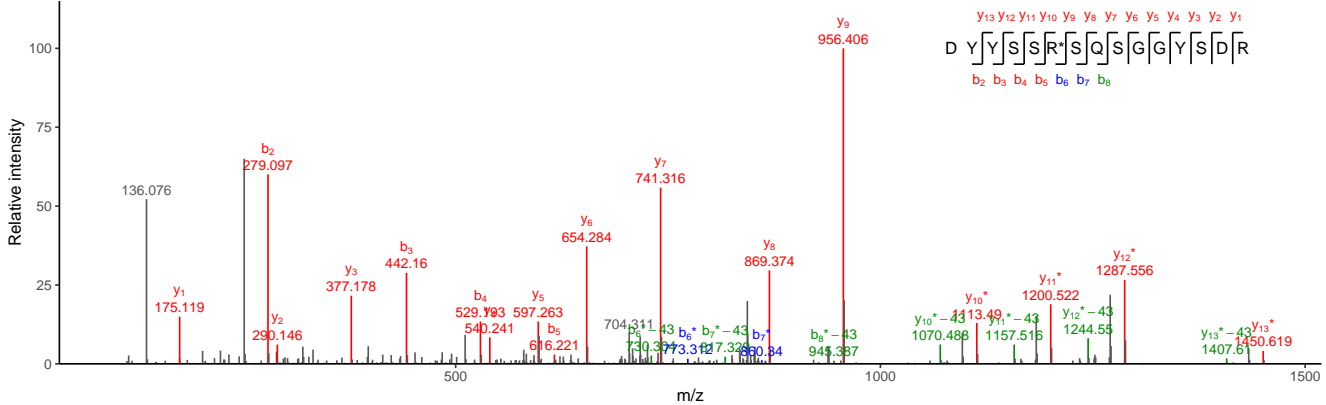

Ground truth: true, ionFinder classification: true

Ion type ■ Det ■ Amb ■ DetNL ■ ArtNL

file: 02207a\_BD1-TUM\_mod\_citrullination\_s\_1\_01\_01-DDA-1h-R1, scan: 24613

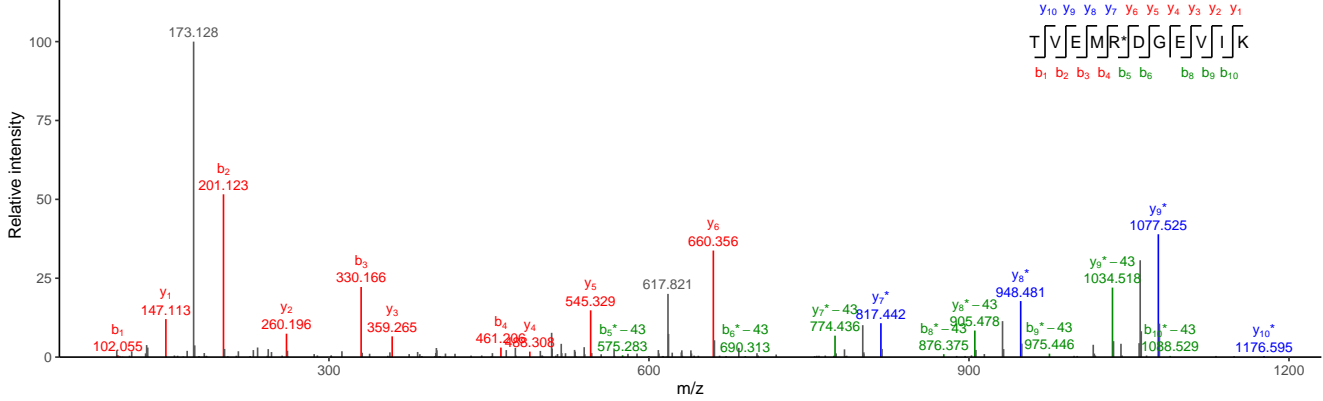

file: 02207a\_BB2-TUM\_mod\_citrullination\_l\_14\_01\_01-DDA-1h-R1, scan: 11178

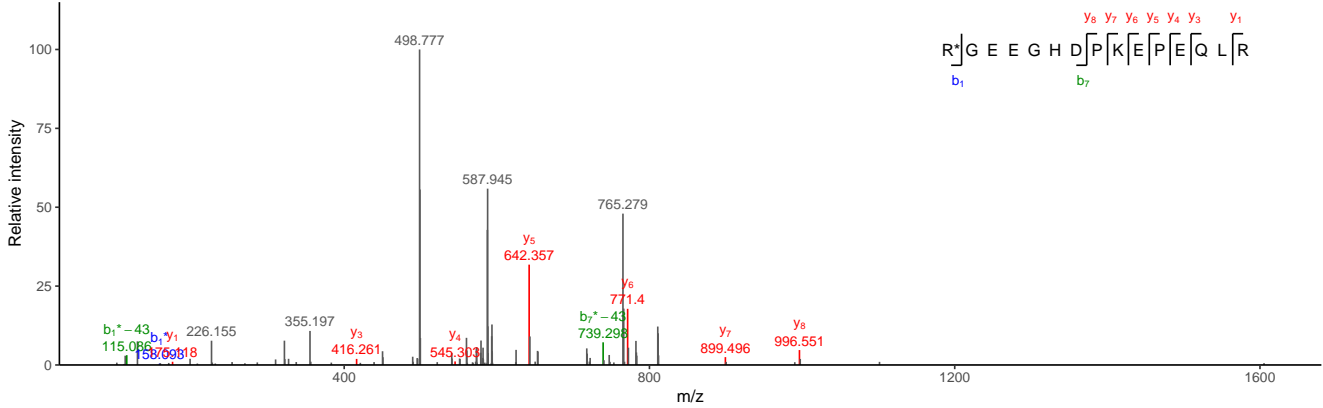

file: 02207a\_BA6-TUM\_mod\_citrullination\_l\_6\_01\_01-DDA-1h-R1, scan: 14852

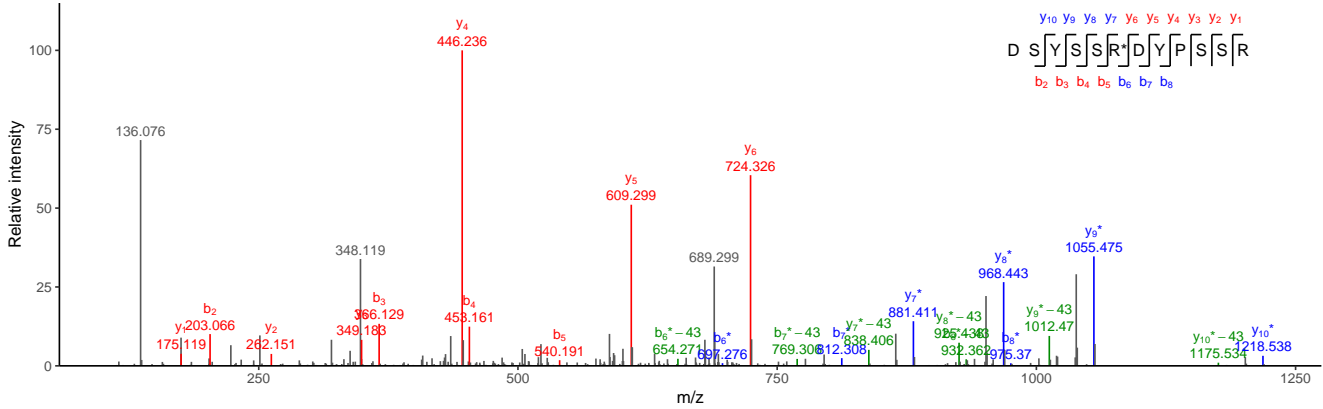

Ground truth: true, ionFinder classification: true

Ion type ■ Det ■ Amb ■ DetNL ■ ArtNL

file: 02207a\_BA4-TUM\_mod\_citrullination\_L\_4\_01\_01-DDA-1h-R1, scan: 22441

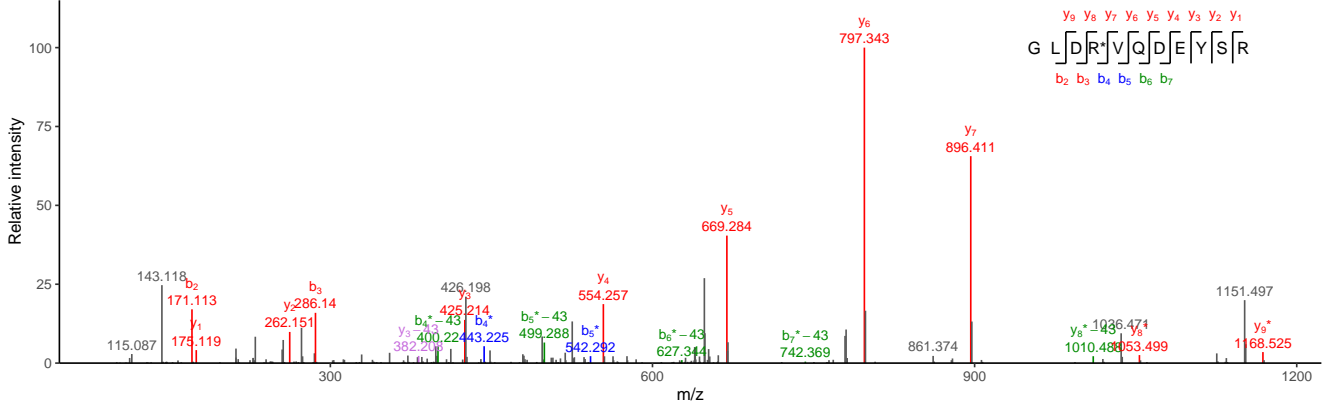

file: 02207a\_BD1-TUM\_mod\_citrullination\_s\_1\_01\_01-DDA-1h-R1, scan: 10179

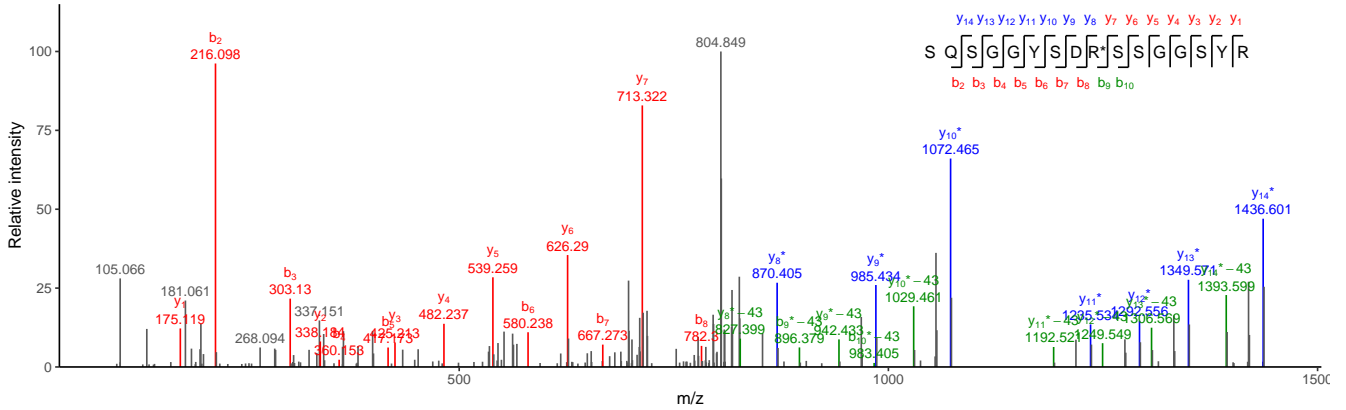

file: 02207a\_BB2-TUM\_mod\_citrullination\_L\_14\_01\_01-DDA-1h-R1, scan: 41854

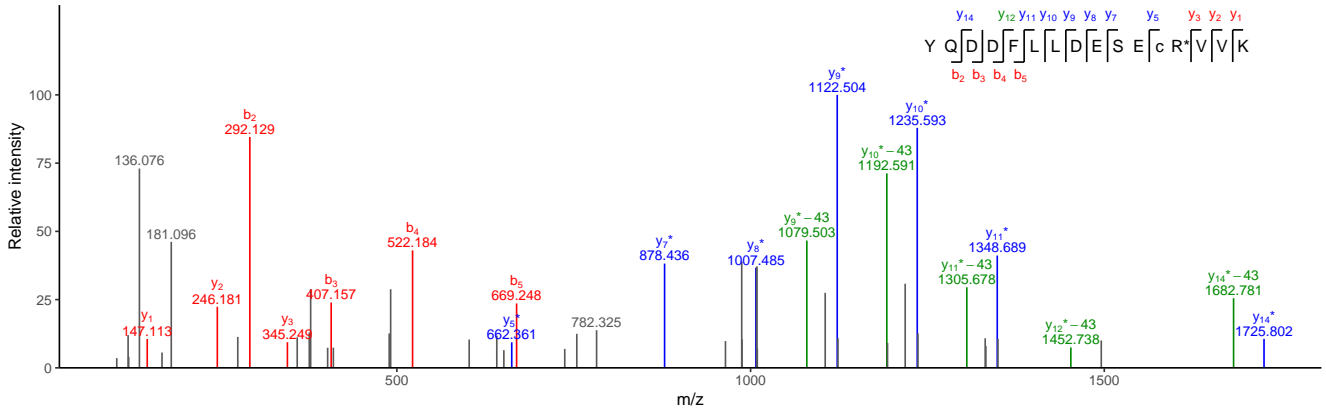



Ground truth: true, ionFinder classification: true

Ion type ■ Det ■ Amb ■ DetNL ■ ArtNL

file: 02207a\_BD2-TUM\_mod\_citrullination\_s\_2\_01\_01-DDA-1h-R1, scan: 51608

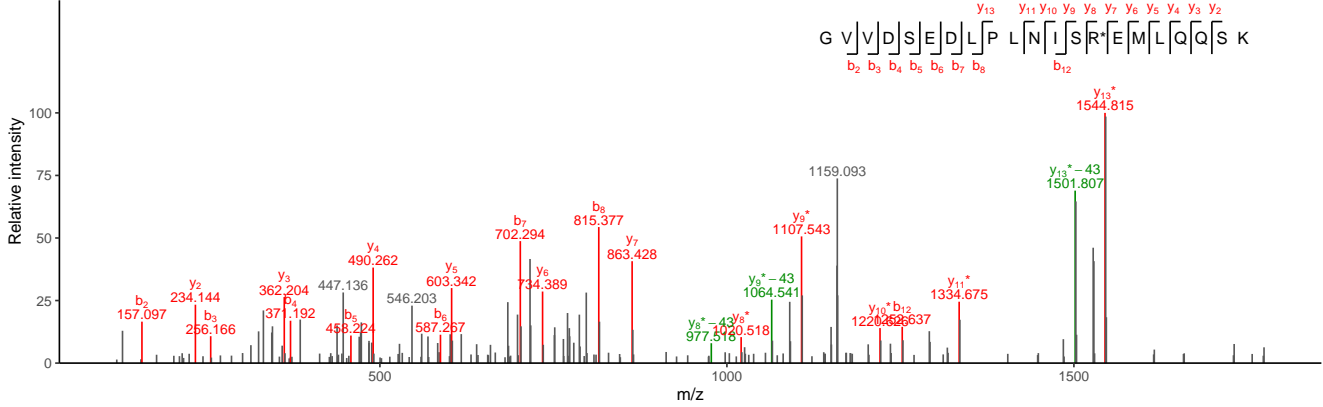

file: 02207a\_BD2-TUM\_mod\_citrullination\_s\_2\_01\_01-DDA-1h-R1, scan: 32954

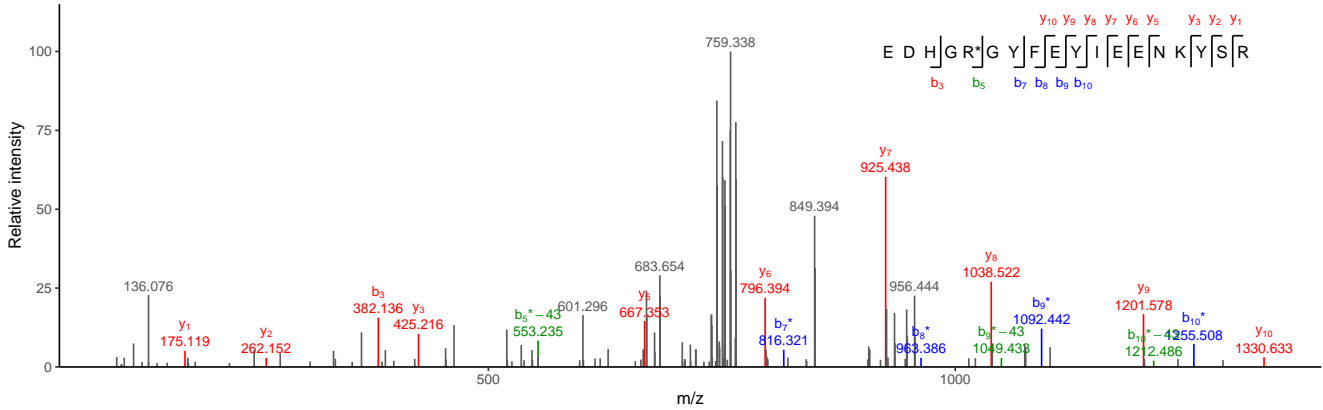

file: 02207a\_BB1-TUM\_mod\_citrullination\_l\_13\_01\_01-DDA-1h-R1, scan: 14689

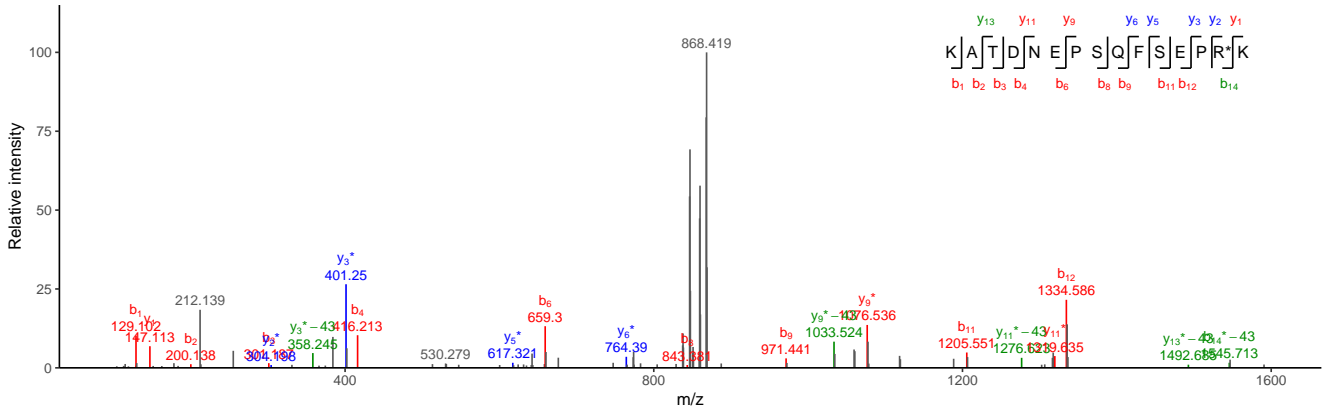

Ground truth: true, ionFinder classification: true

Ion type ■ Det ■ Amb ■ DetNL ■ ArtNL

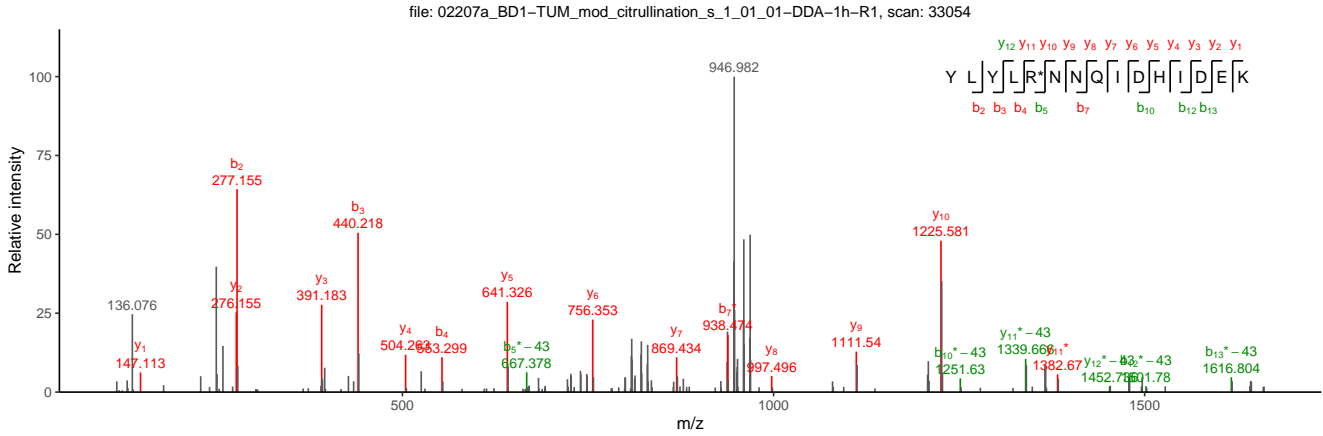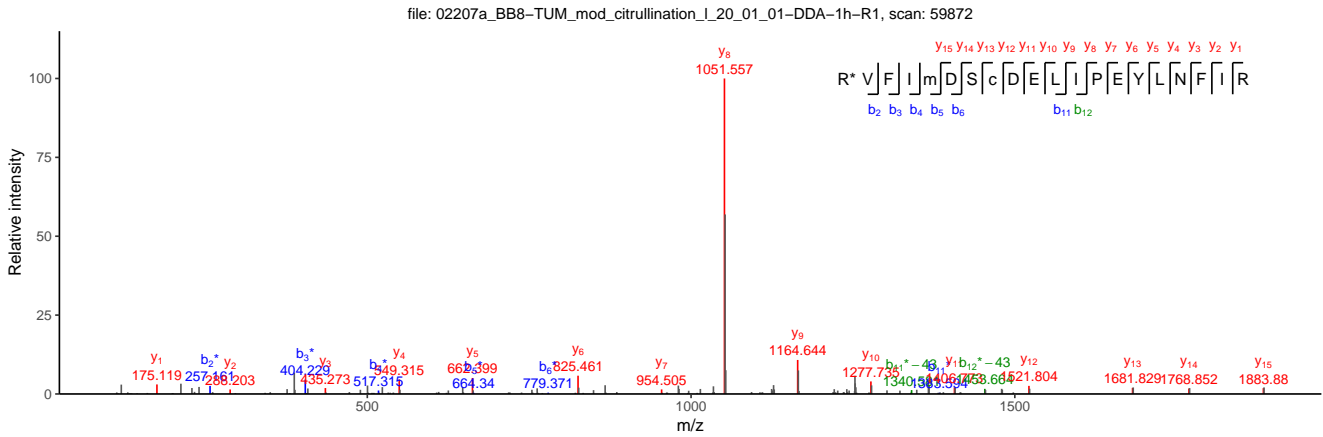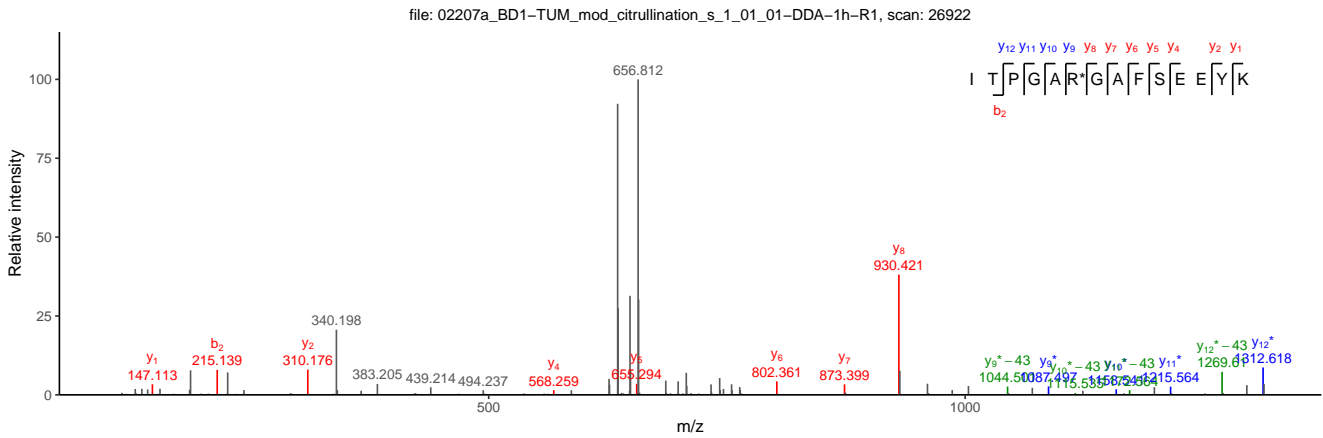

Ground truth: true, ionFinder classification: true

Ion type ■ Det ■ Amb ■ DetNL ■ ArtNL

file: 02207a\_BD1-TUM\_mod\_citrullination\_s\_1\_01\_01-DDA-1h-R1, scan: 16409

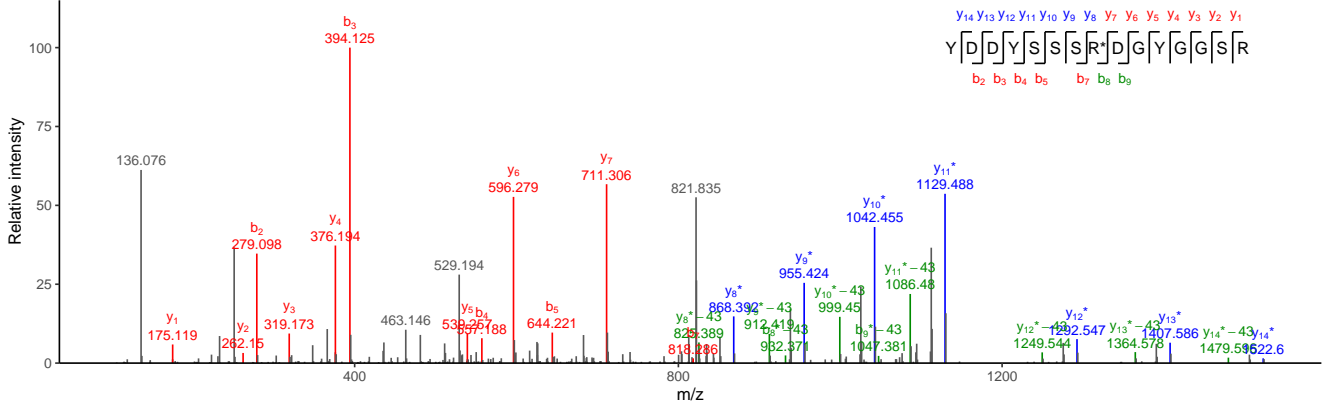

file: 02207a\_BA11-TUM\_mod\_citrullination\_l\_11\_01\_01-DDA-1h-R1, scan: 35499

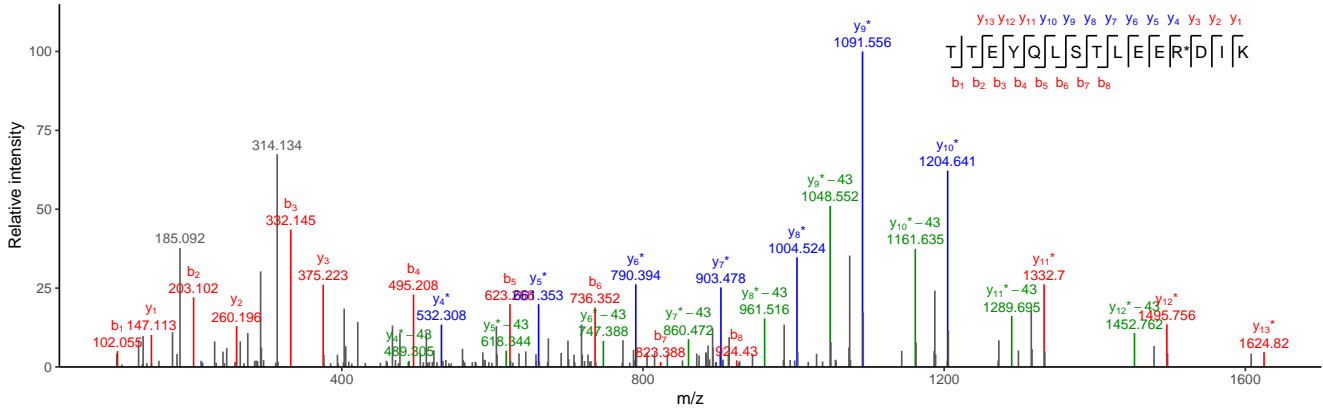

file: 02207a\_BA12-TUM\_mod\_citrullination\_l\_12\_01\_01-DDA-1h-R1, scan: 5823

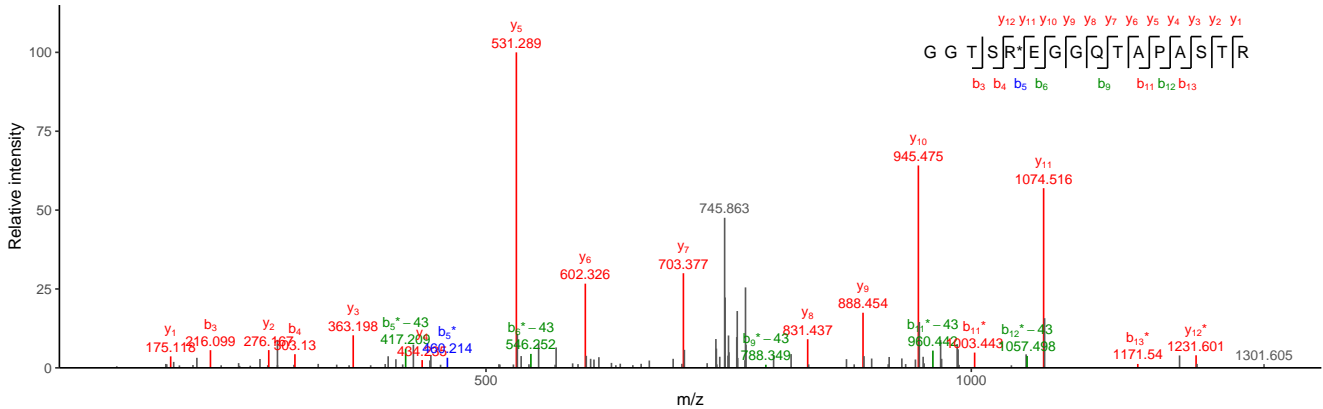

Ground truth: true, ionFinder classification: true

Ion type ■ Det ■ Amb ■ DetNL ■ ArtNL

file: 02207a\_BD2-TUM\_mod\_citrullination\_s\_2\_01\_01-DDA-1h-R1, scan: 12449

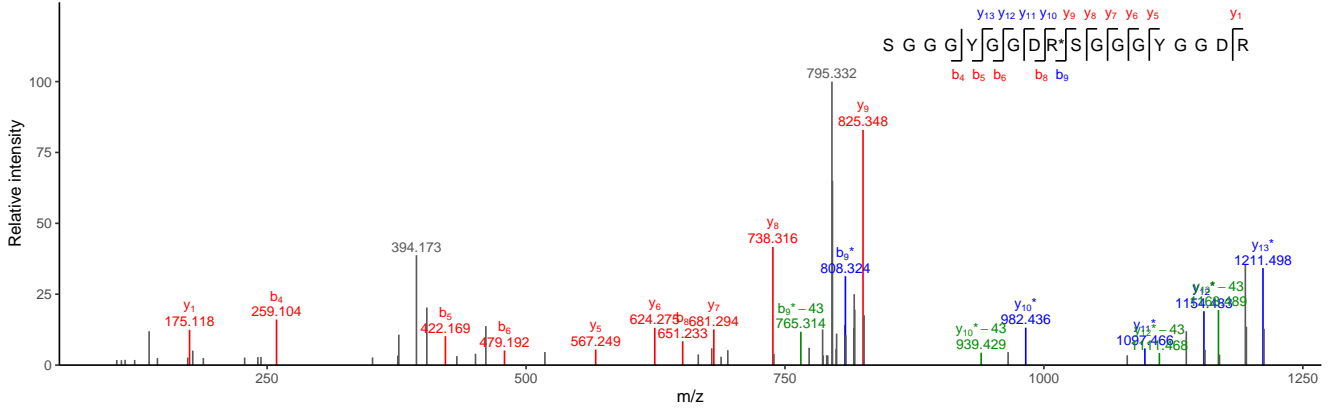

file: 02207a\_BA11-TUM\_mod\_citrullination\_L\_11\_01\_01-DDA-1h-R1, scan: 52932

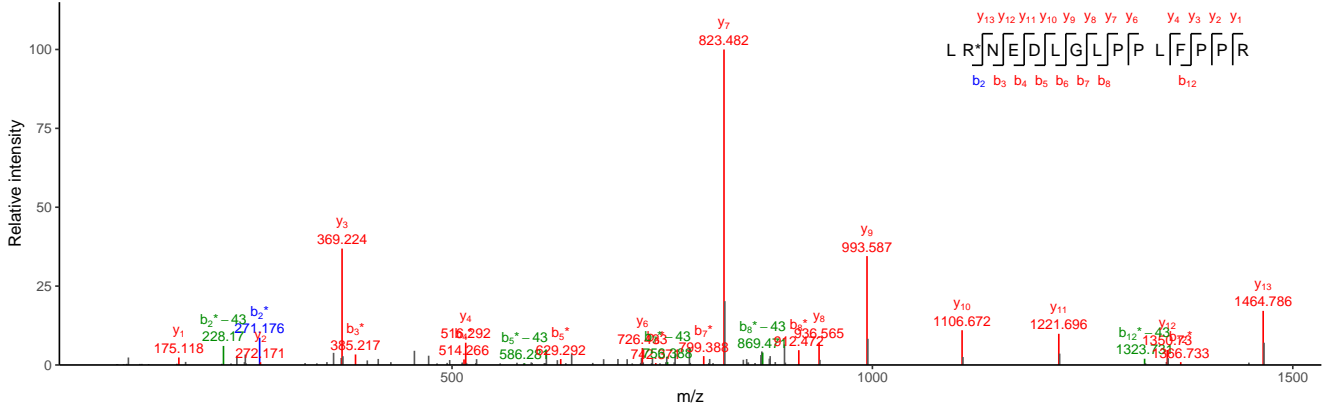

file: 02207a\_BD2-TUM\_mod\_citrullination\_s\_2\_01\_01-DDA-1h-R1, scan: 33252

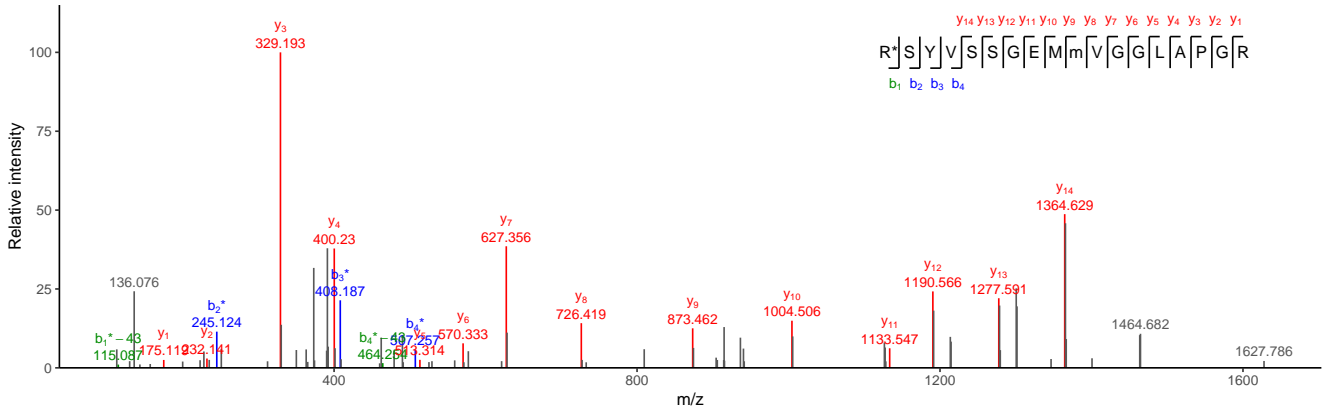

Ground truth: true, ionFinder classification: true

Ion type ■ Det ■ Amb ■ DetNL ■ ArtNL

file: 02207a\_BB10-TUM\_mod\_citrullination\_L\_22\_01\_01-DDA-1h-R1, scan: 21466

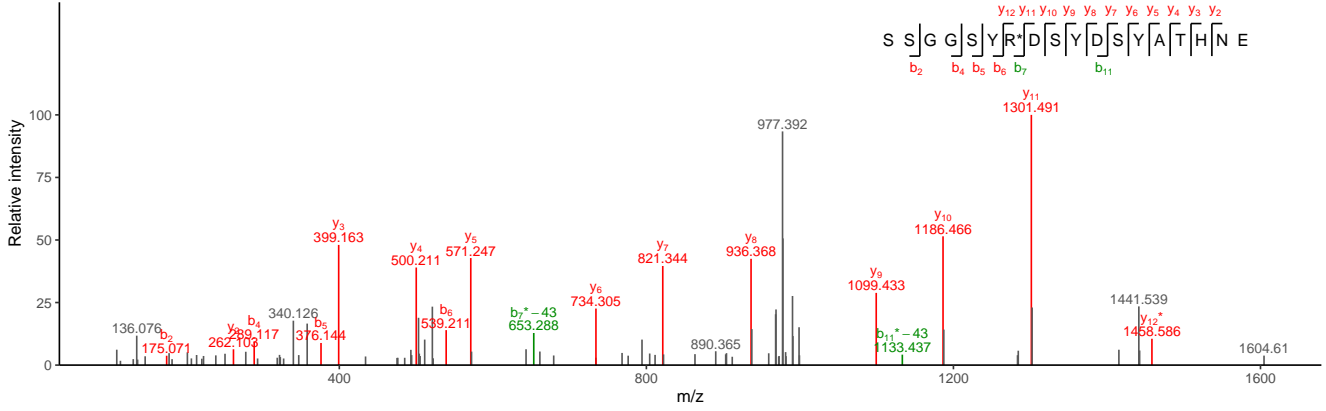

file: 02207a\_BB6-TUM\_mod\_citrullination\_L\_18\_01\_01-DDA-1h-R1, scan: 33391

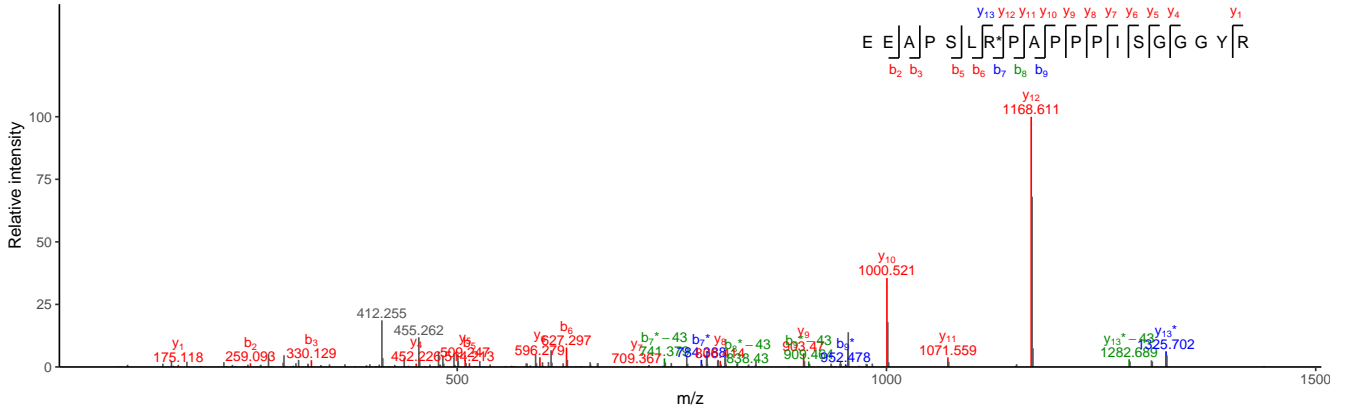

file: 02207a\_BD2-TUM\_mod\_citrullination\_s\_2\_01\_01-DDA-1h-R1, scan: 43378

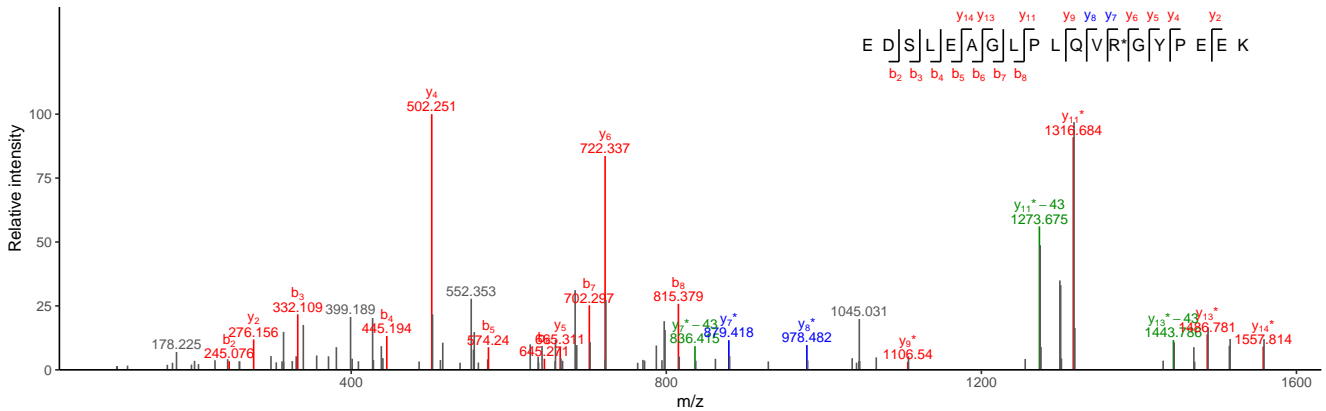

Ground truth: true, ionFinder classification: true

Ion type ■ Det ■ Amb ■ DetNL ■ ArtNL

file: 02207a\_BB10-TUM\_mod\_citrullination\_I\_22\_01\_01-DDA-1h-R1, scan: 13576

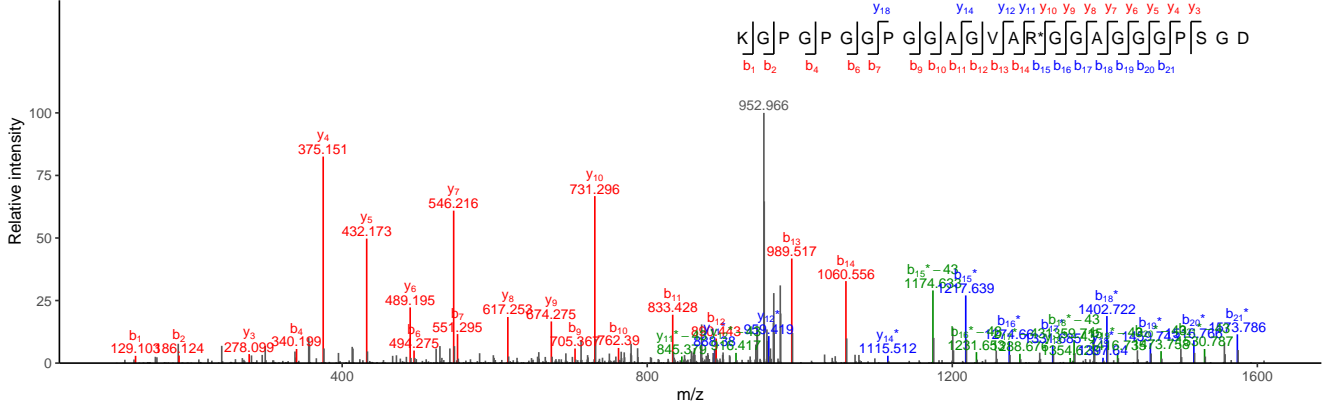

file: 02207a\_BA12-TUM\_mod\_citrullination\_I\_12\_01\_01-DDA-1h-R1, scan: 6812

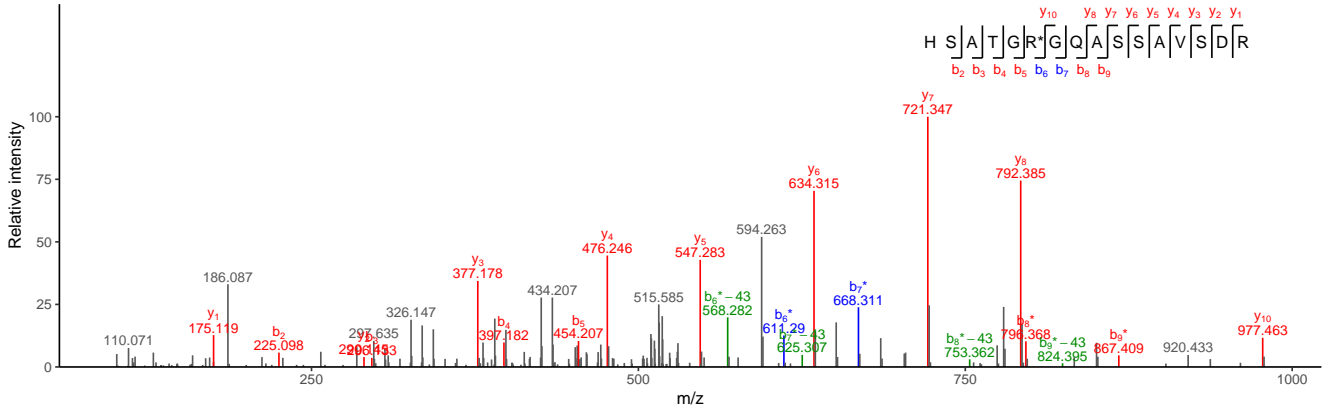

file: 02207a\_BB8-TUM\_mod\_citrullination\_I\_20\_01\_01-DDA-1h-R1, scan: 21552

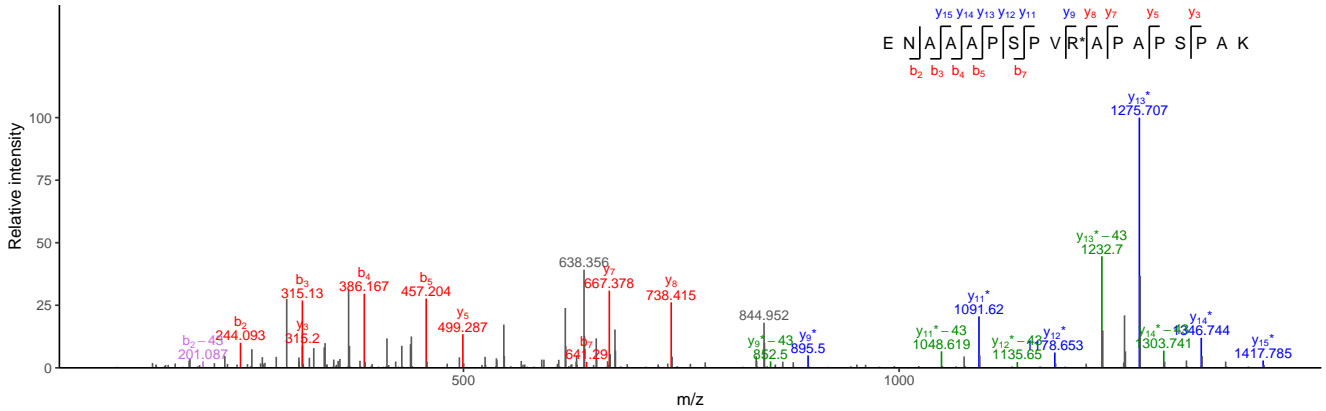

Ground truth: true, ionFinder classification: true

Ion type ■ Det ■ Amb ■ DetNL ■ ArtNL

file: 02207a\_BD2-TUM\_mod\_citrullination\_s\_2\_01\_01-DDA-1h-R1, scan: 47052

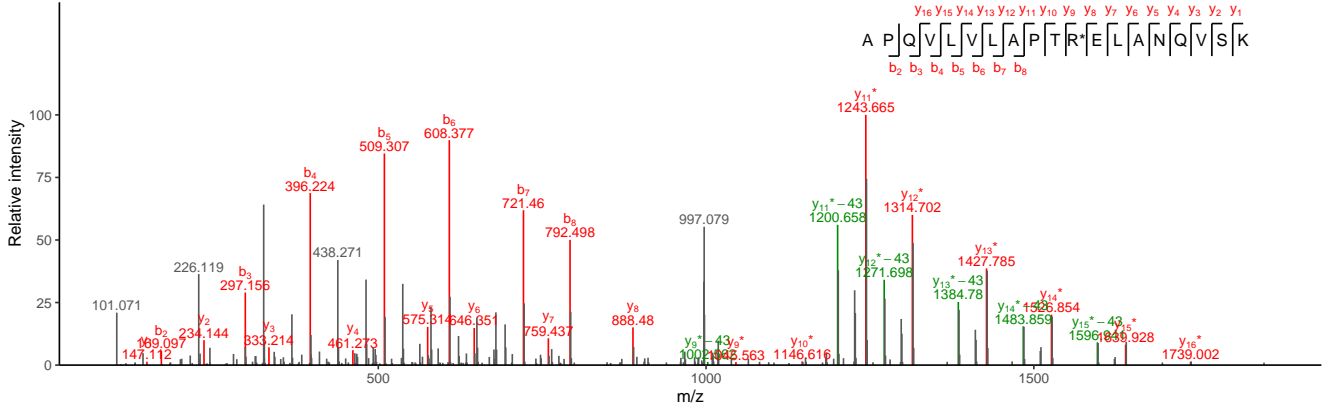

file: 02207a\_BD2-TUM\_mod\_citrullination\_s\_2\_01\_01-DDA-1h-R1, scan: 19235

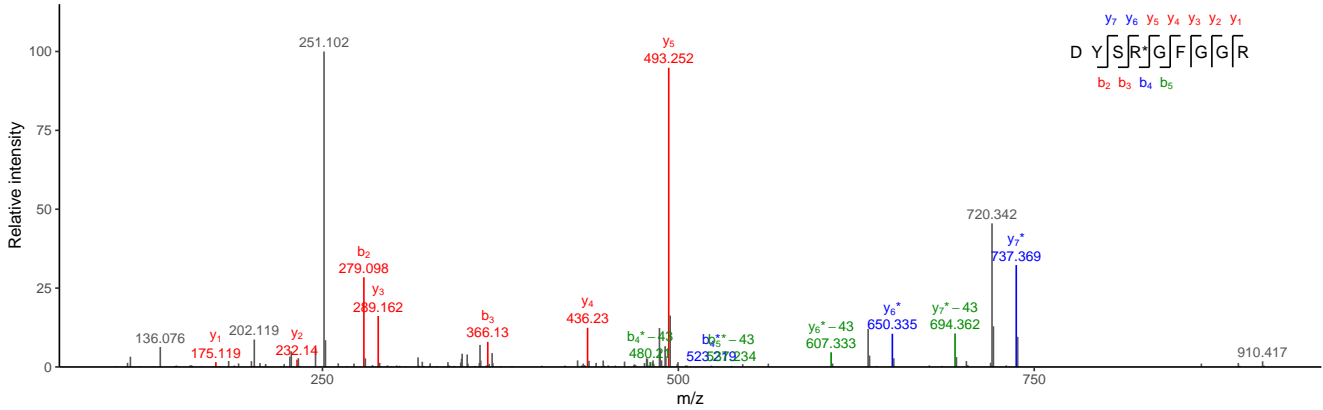

file: 02207a\_BB5-TUM\_mod\_citrullination\_L\_17\_01\_01-DDA-1h-R1, scan: 33818

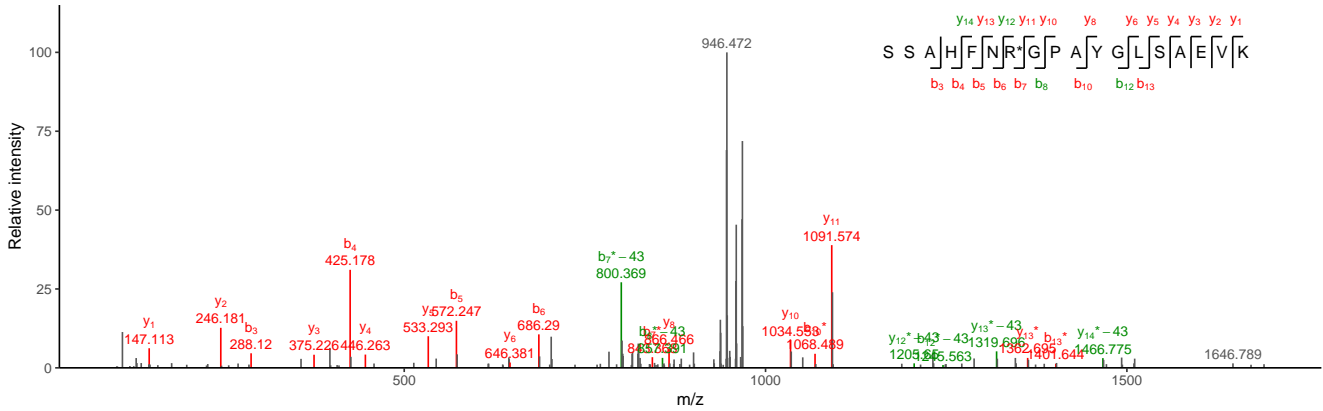

Ground truth: true, ionFinder classification: true

Ion type ■ Det ■ Amb ■ DetNL ■ ArtNL

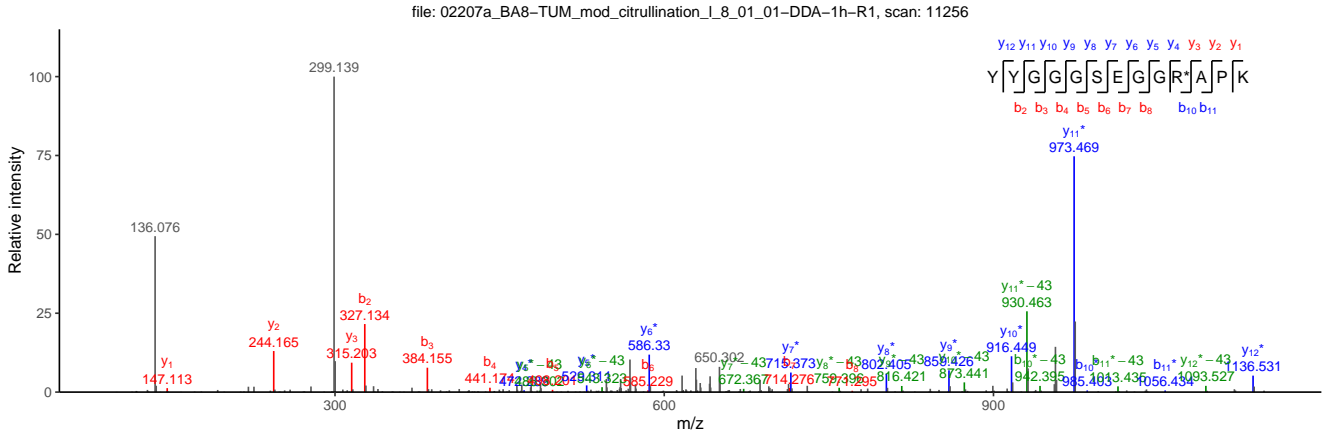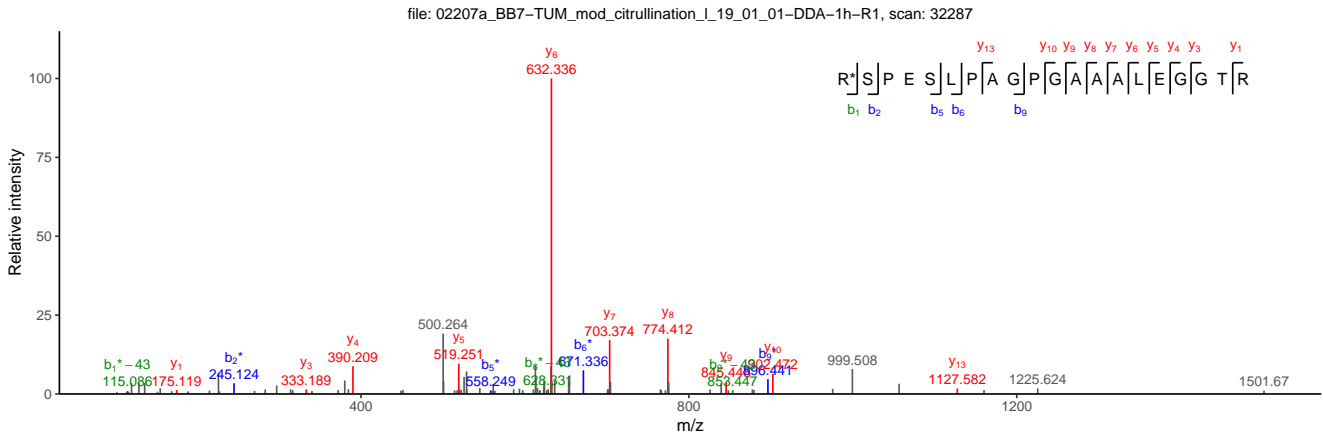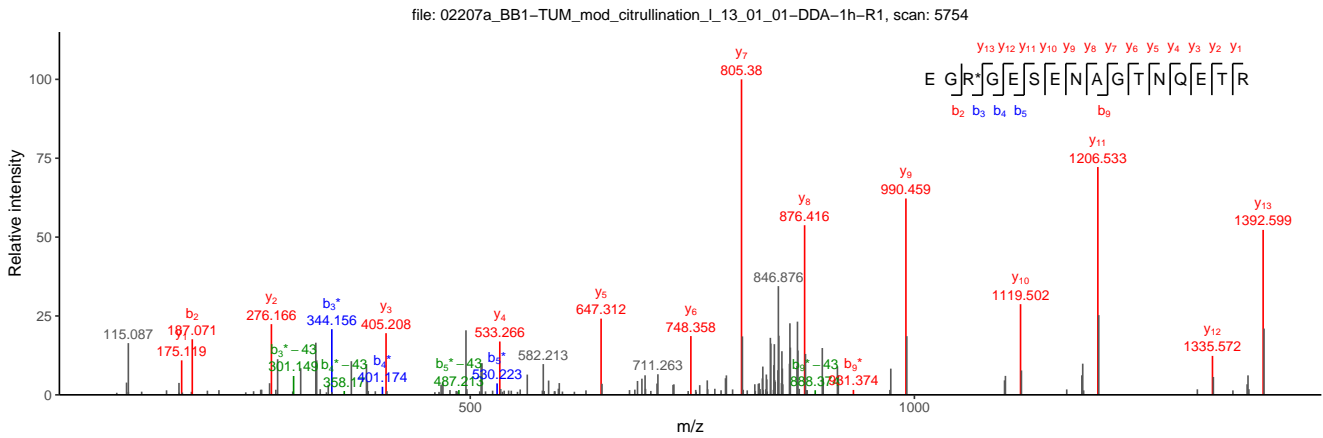



Ground truth: true, ionFinder classification: true

Ion type ■ Det ■ Amb ■ DetNL ■ ArtNL

file: 02207a\_BB3-TUM\_mod\_citrullination\_I\_15\_01\_01-DDA-1h-R1, scan: 23417

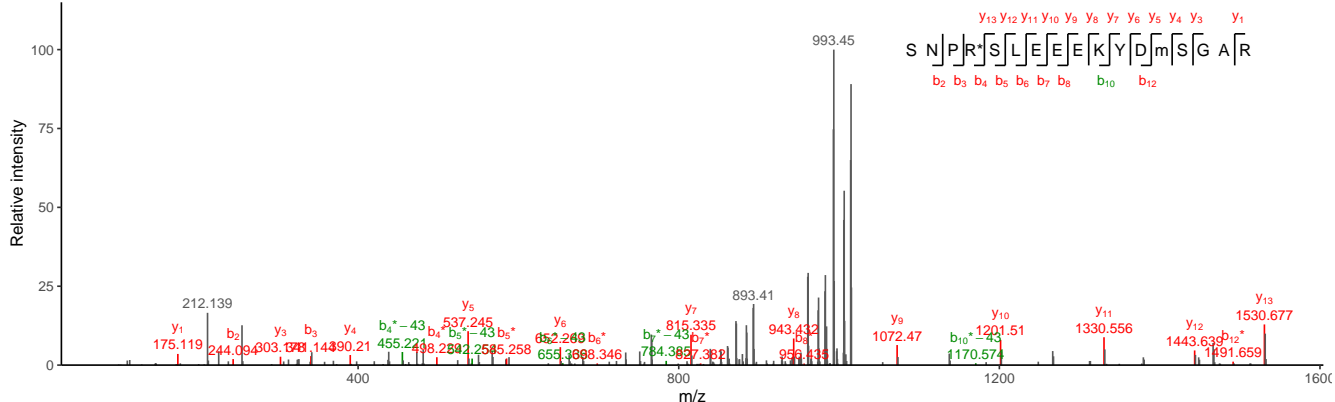

file: 02207a\_BD1-TUM\_mod\_citrullination\_s\_1\_01\_01-DDA-1h-R1, scan: 12023

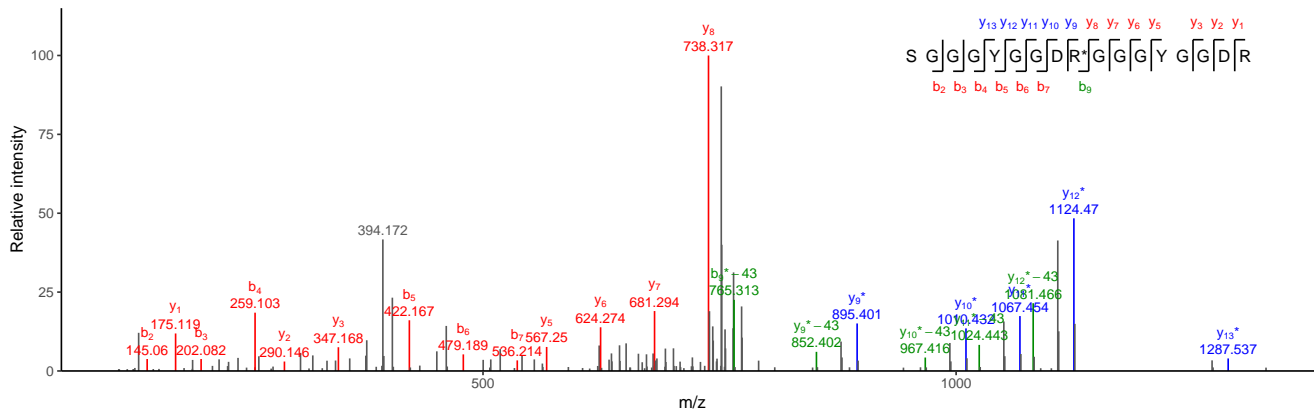

file: 02207a\_BB3-TUM\_mod\_citrullination\_I\_15\_01\_01-DDA-1h-R1, scan: 42389

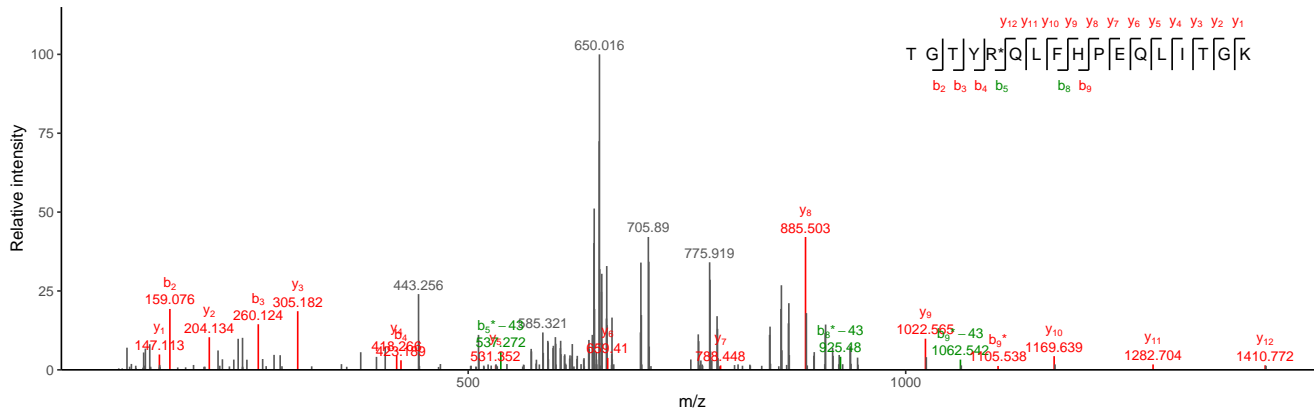

Ground truth: true, ionFinder classification: true

Ion type ■ Det ■ Amb ■ DetNL ■ ArtNL

file: 02207a\_BB5-TUM\_mod\_citrullination\_L17\_01\_01-DDA-1h-R1, scan: 7190

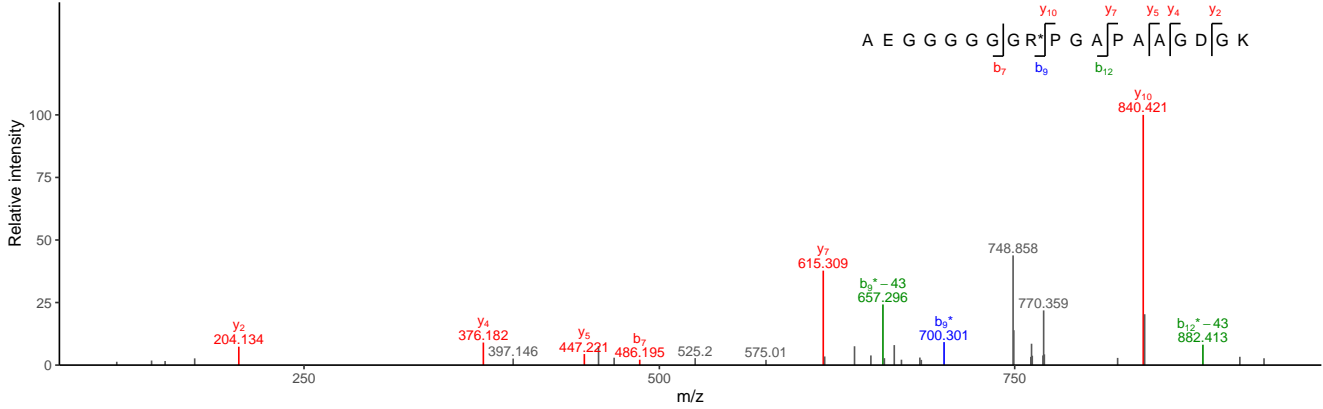

file: 02207a\_BA12-TUM\_mod\_citrullination\_L12\_01\_01-DDA-1h-R1, scan: 5517

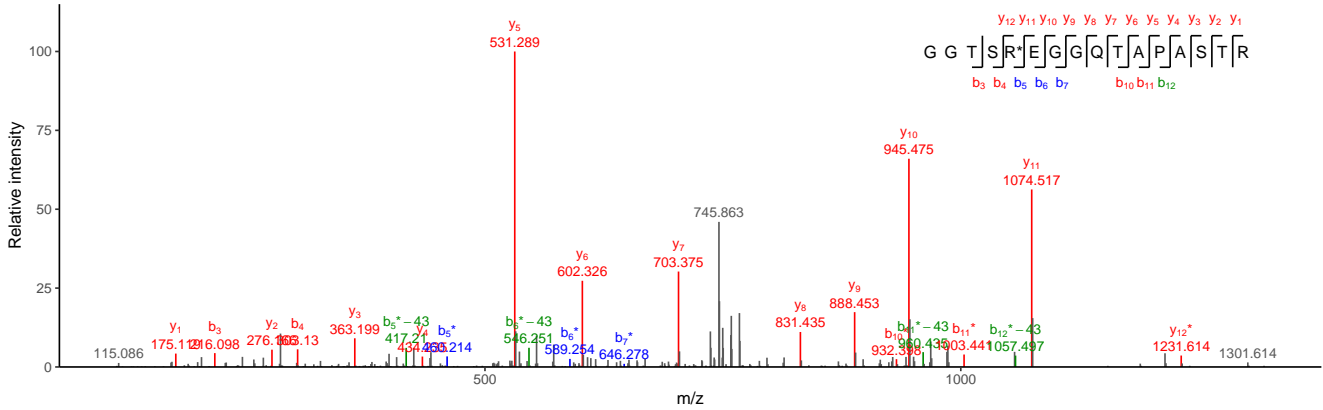

file: 02207a\_BD2-TUM\_mod\_citrullination\_s\_2\_01\_01-DDA-1h-R1, scan: 12143

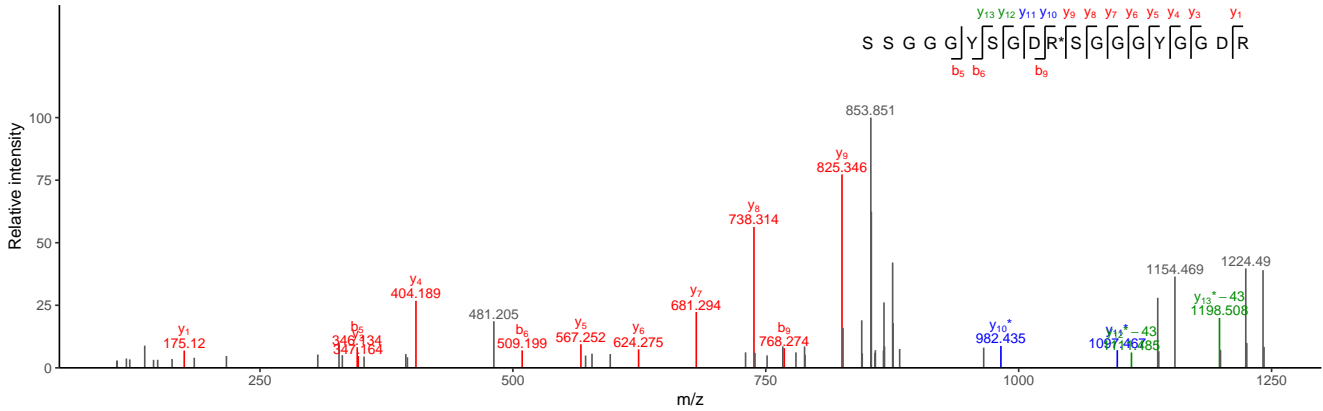

Ground truth: true, ionFinder classification: true

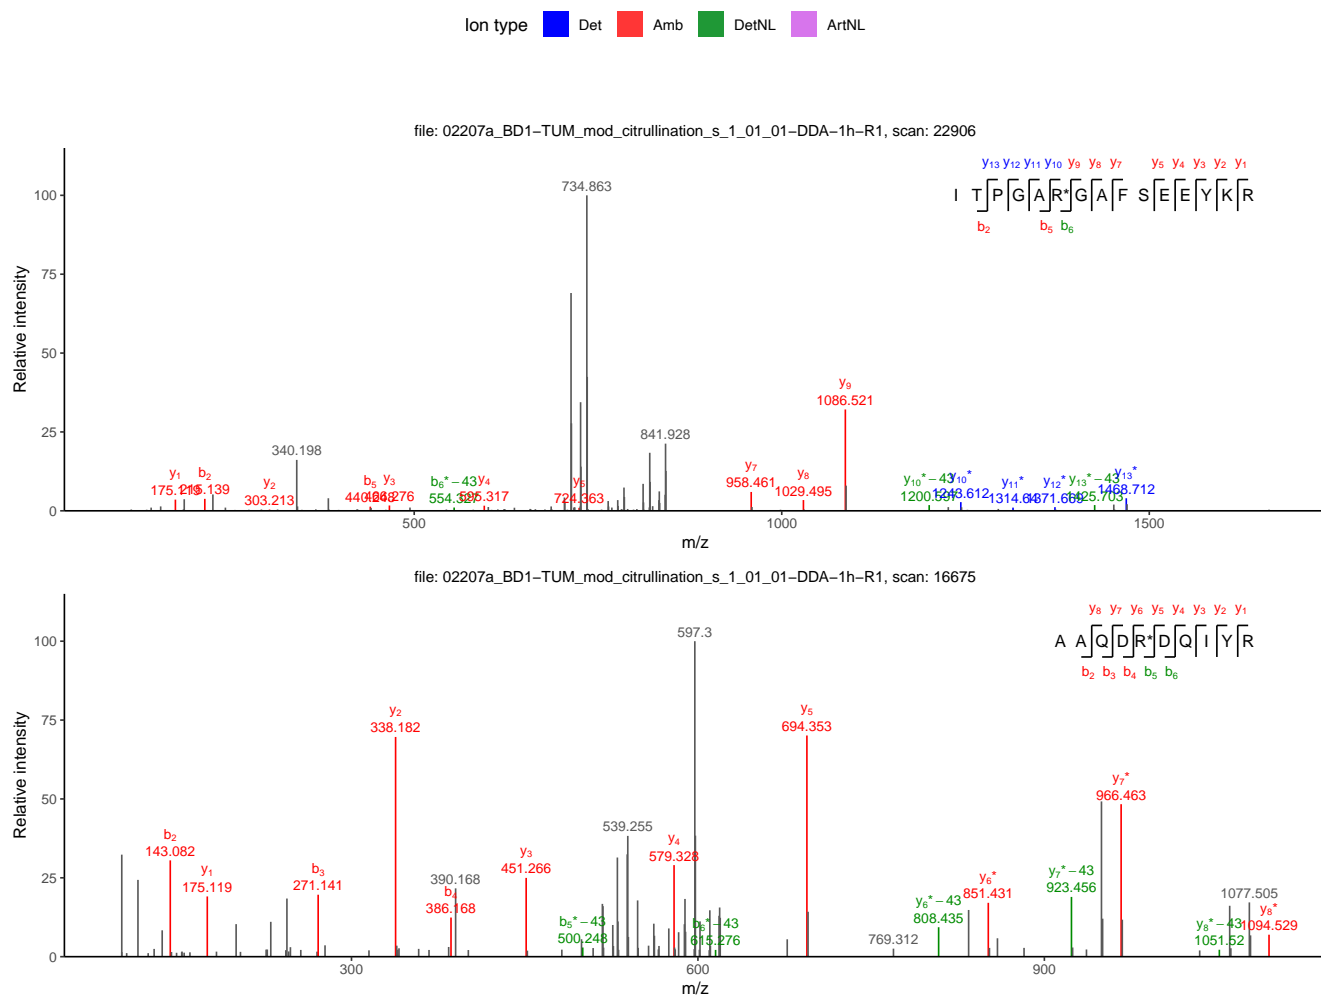

**Figure S1.** MS<sup>2</sup> spectra from 77 PSMs of synthetic spectra which were identified as *true* by ionFinder and classified as *true* in the ground truth dataset.

Ground truth: true, ionFinder classification: likely

Ion type ■ Det ■ Amb ■ DetNL ■ ArtNL

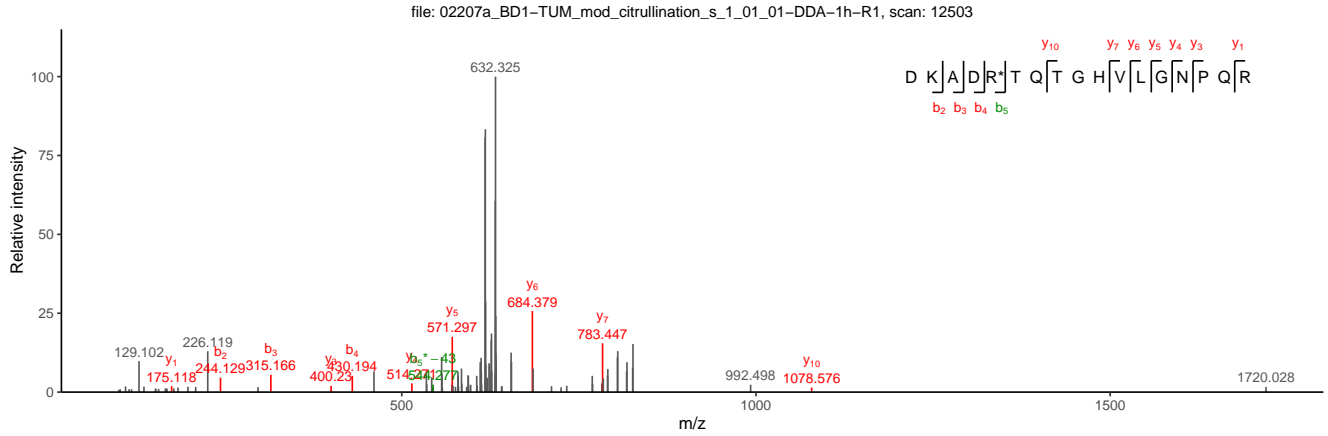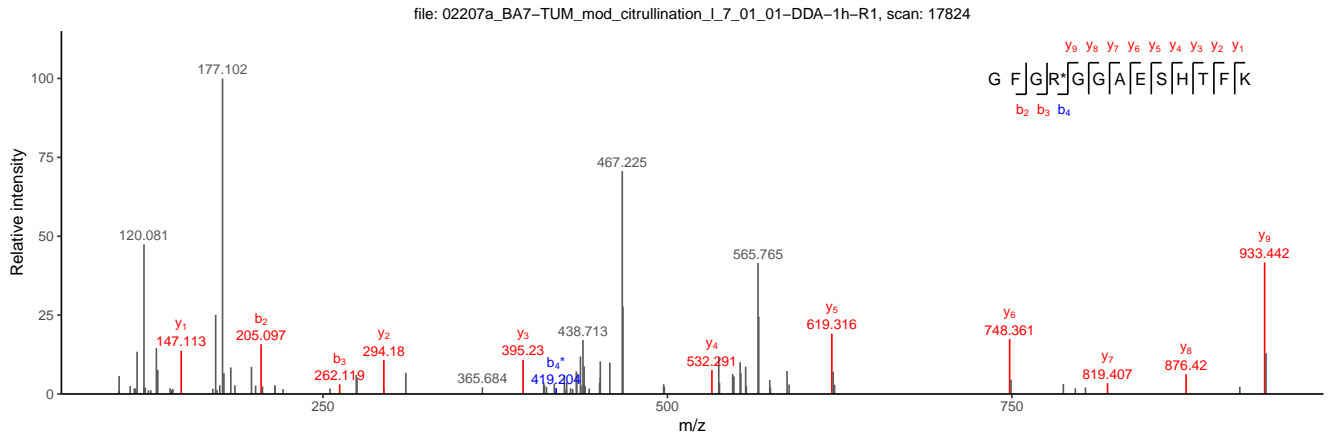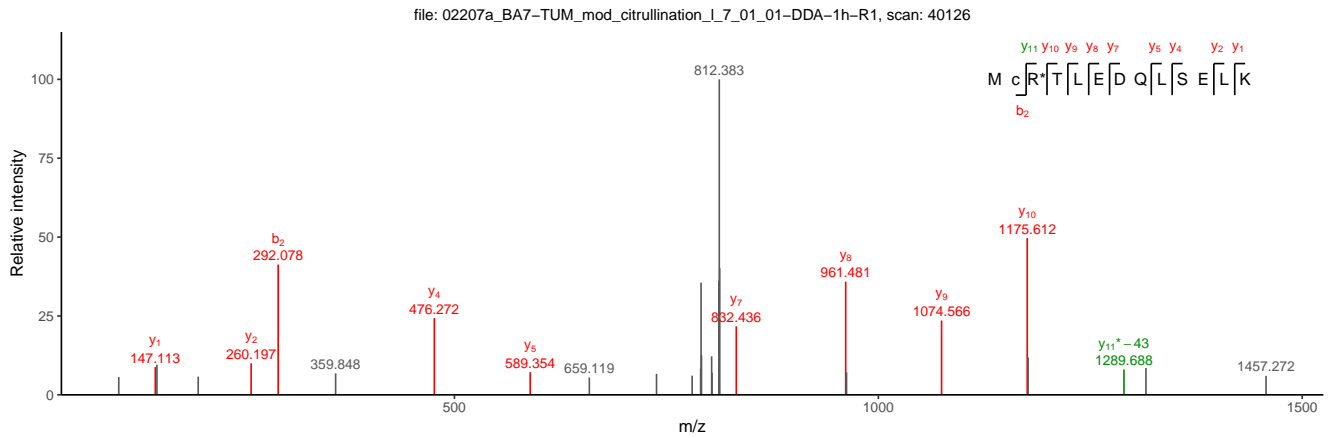

Ground truth: true, ionFinder classification: likely

Ion type ■ Det ■ Amb ■ DetNL ■ ArtNL

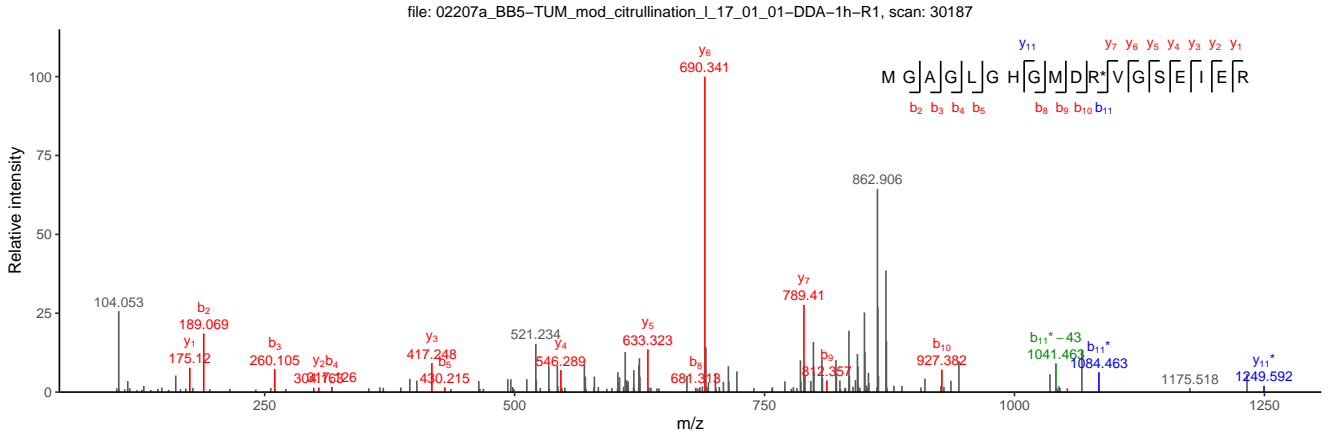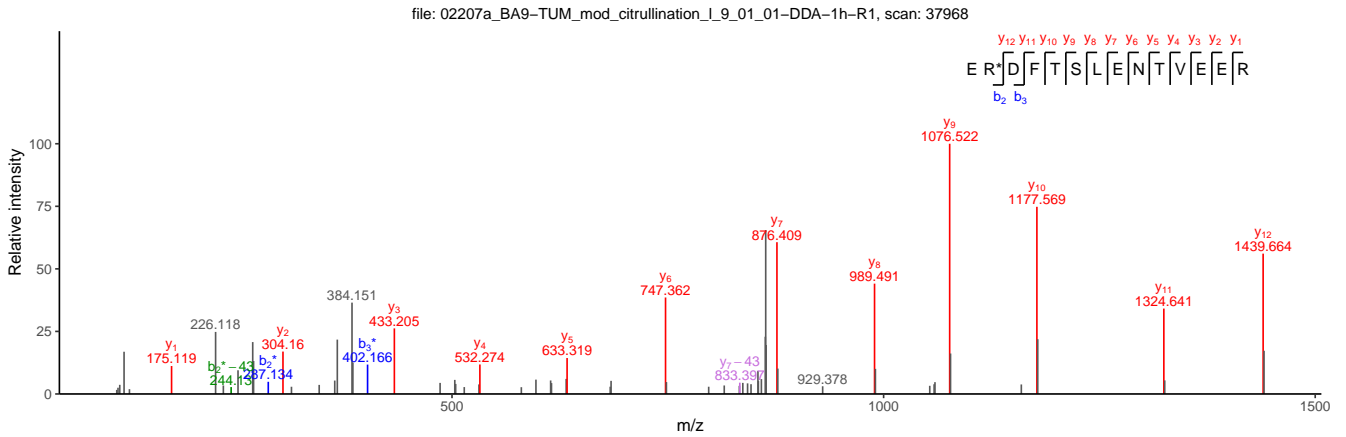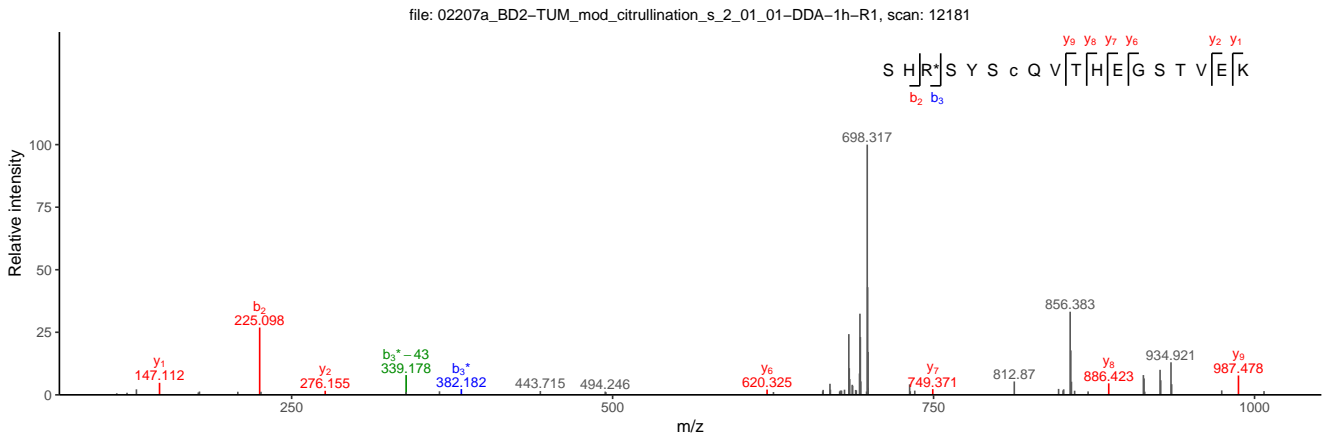

Ground truth: true, ionFinder classification: likely

Ion type ■ Det ■ Amb ■ DetNL ■ ArtNL

file: 02207a\_BA2-TUM\_mod\_citrullination\_I\_2\_01\_01-DDA-1h-R1, scan: 6275

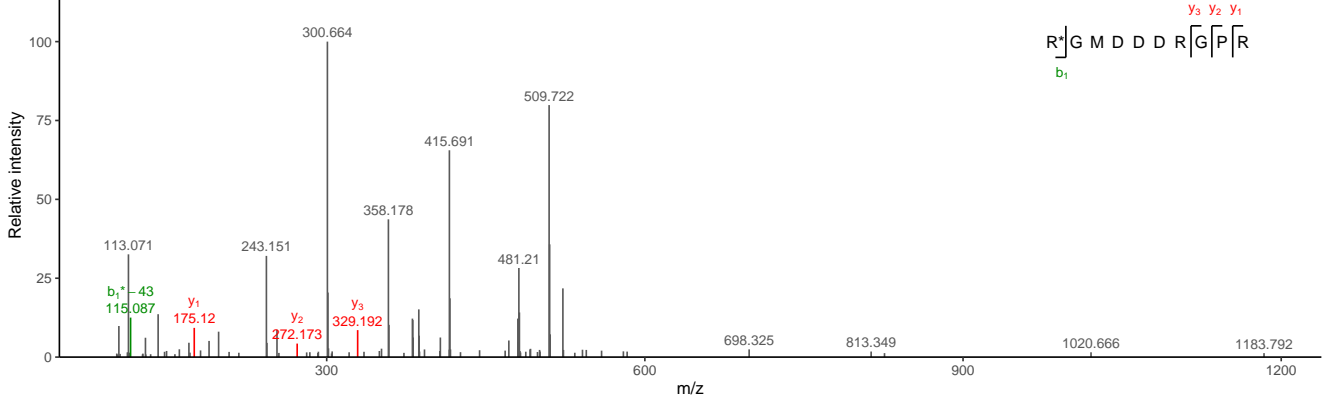

file: 02207a\_BB3-TUM\_mod\_citrullination\_I\_15\_01\_01-DDA-1h-R1, scan: 3948

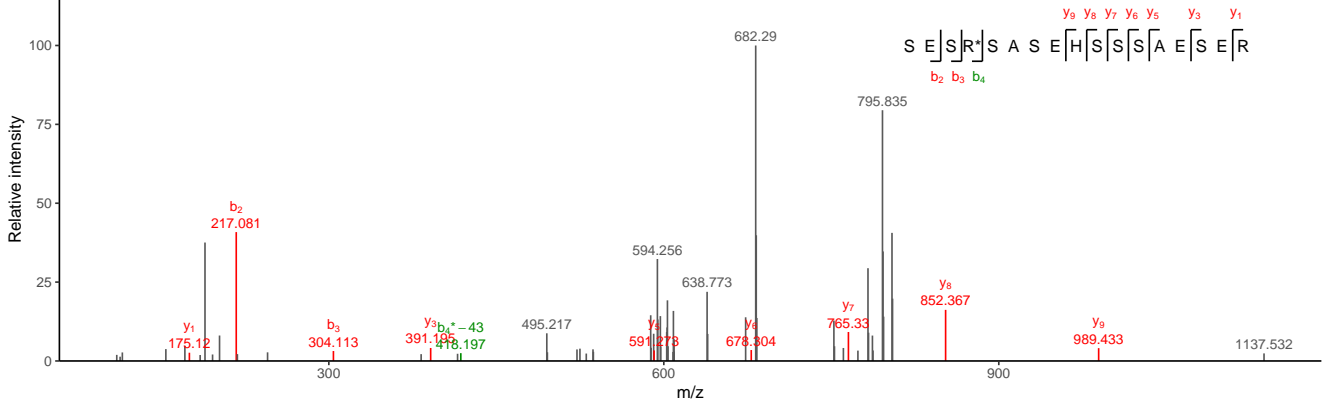

file: 02207a\_BB1-TUM\_mod\_citrullination\_I\_13\_01\_01-DDA-1h-R1, scan: 43883

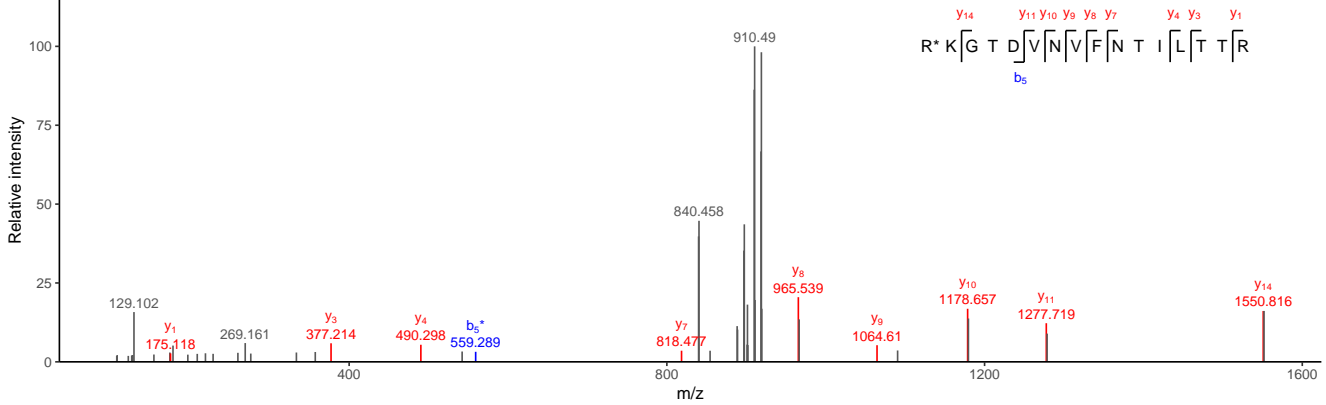

Ground truth: true, ionFinder classification: likely

Ion type ■ Det ■ Amb ■ DetNL ■ ArtNL

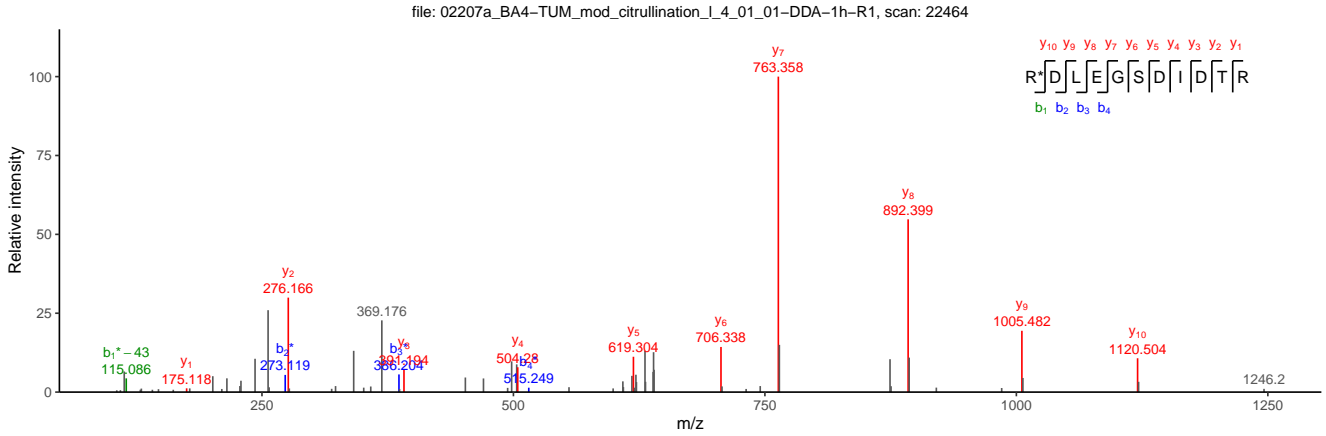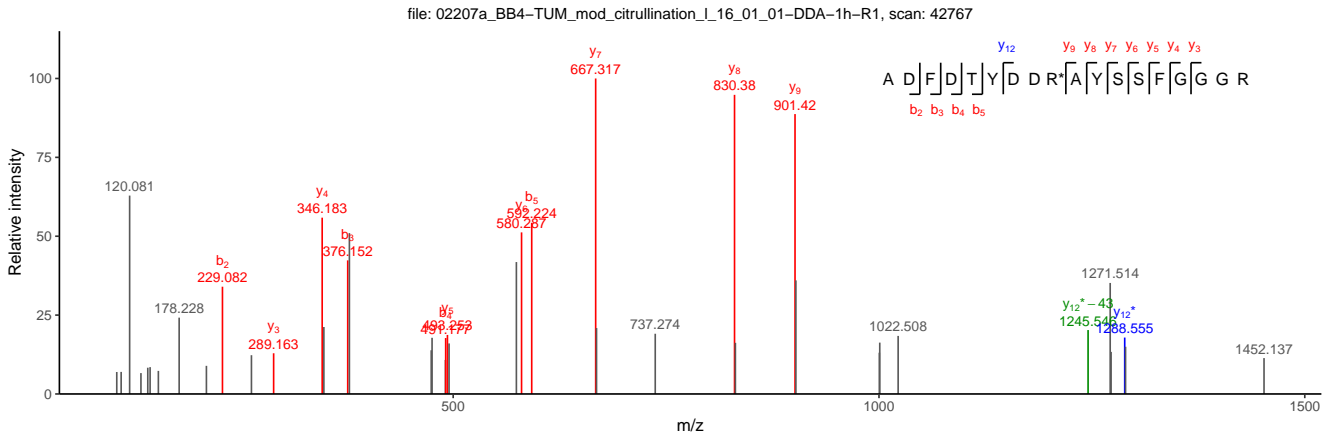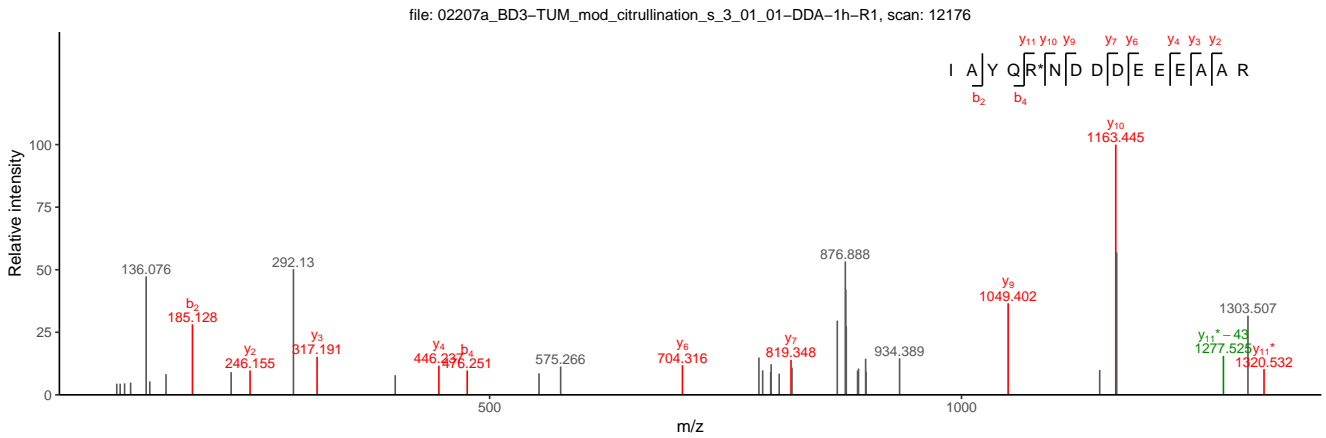

Ground truth: true, ionFinder classification: likely

Ion type ■ Det ■ Amb ■ DetNL ■ ArtNL

file: 02207a\_BA7-TUM\_mod\_citrullination\_L7\_01\_01-DDA-1h-R1, scan: 20171

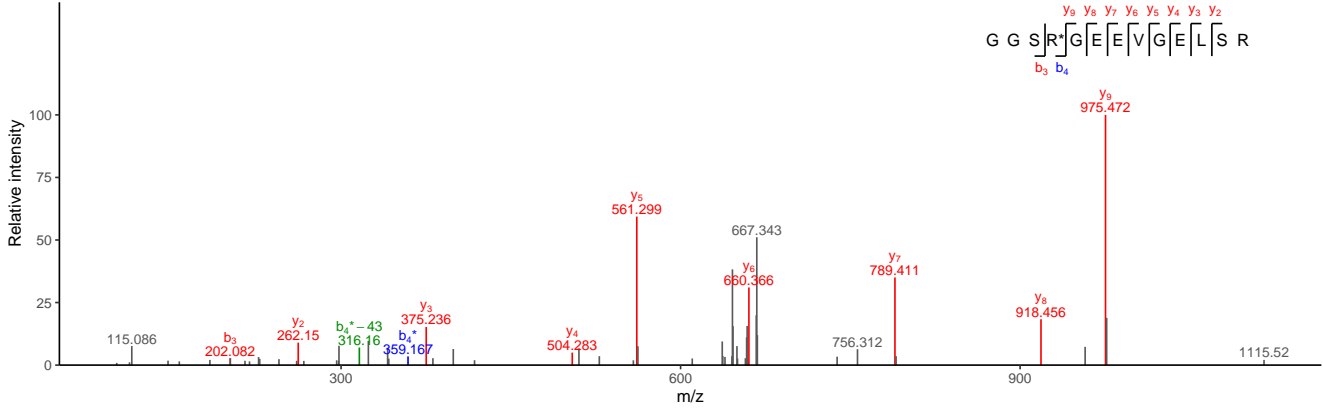

file: 02207a\_BB5-TUM\_mod\_citrullination\_L17\_01\_01-DDA-1h-R1, scan: 33016

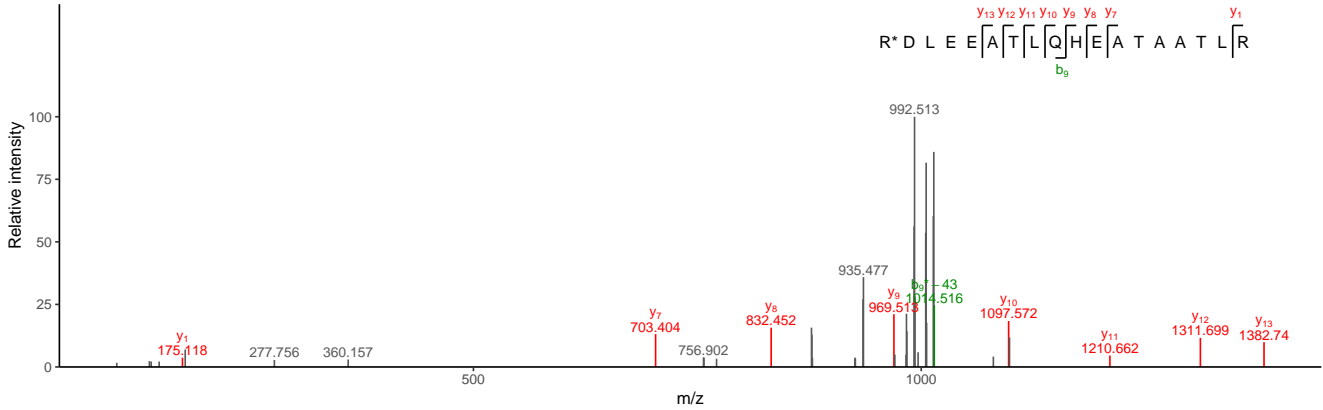

file: 02207a\_BD1-TUM\_mod\_citrullination\_s\_1\_01\_01-DDA-1h-R1, scan: 8427

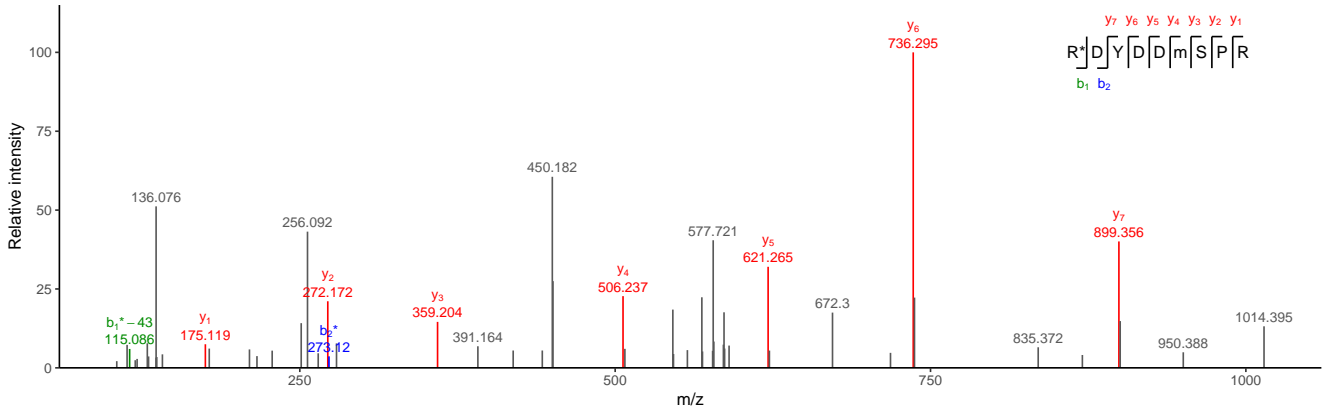



Ground truth: true, ionFinder classification: likely

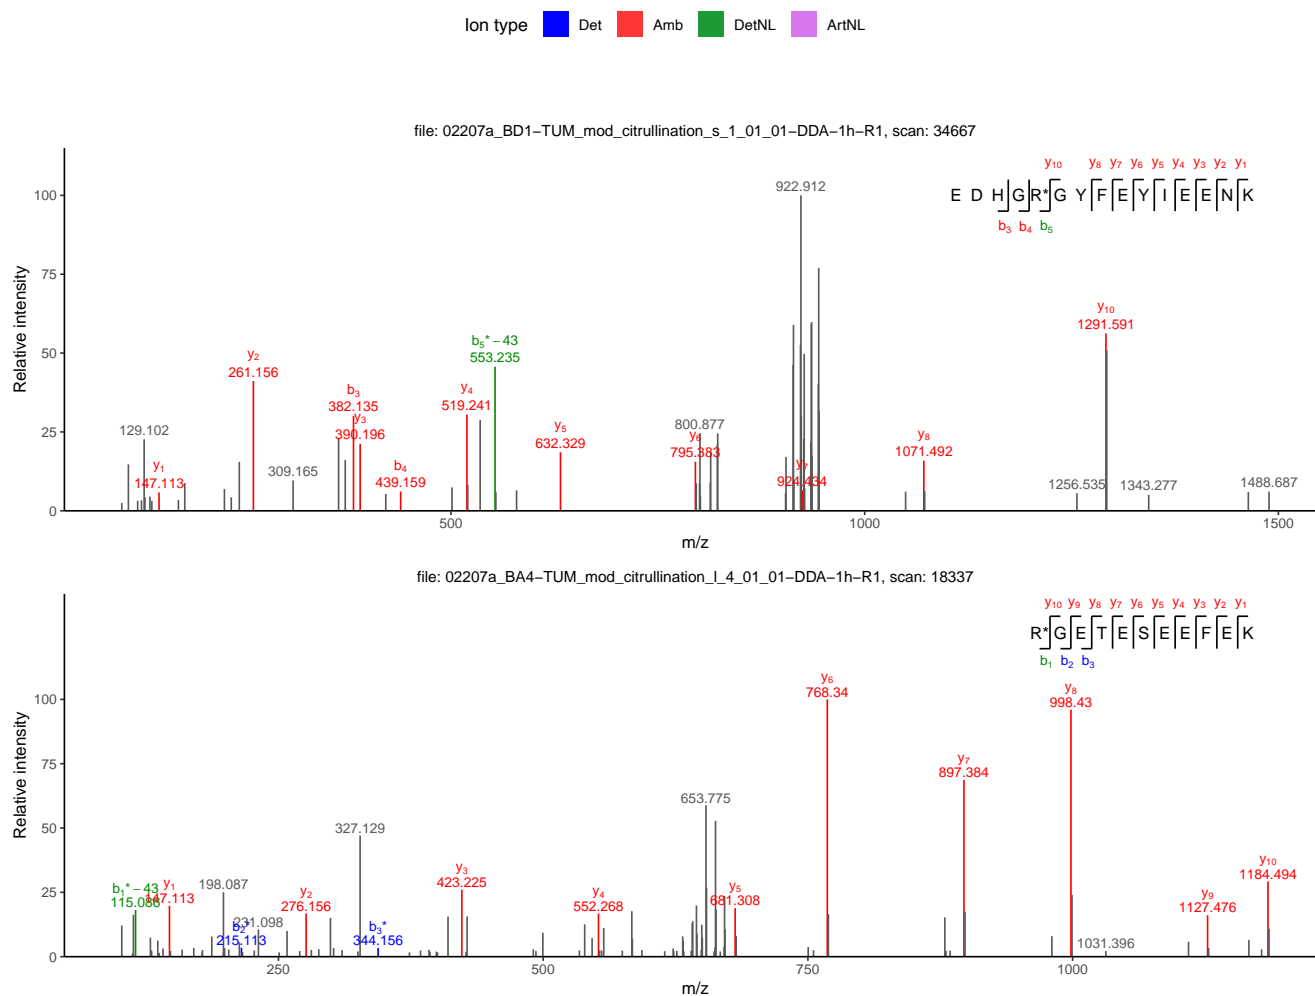

**Figure S2.** MS<sup>2</sup> spectra from 17 PSMs of synthetic spectra which were identified as *likely* by ionFinder and classified as *true* in the ground truth dataset.

Ground truth: true, ionFinder classification: ambiguous

Ion type ■ Det ■ Amb ■ DetNL ■ ArtNL

file: 02207a\_BD1-TUM\_mod\_citrullination\_s\_1\_01\_01-DDA-1h-R1, scan: 21467

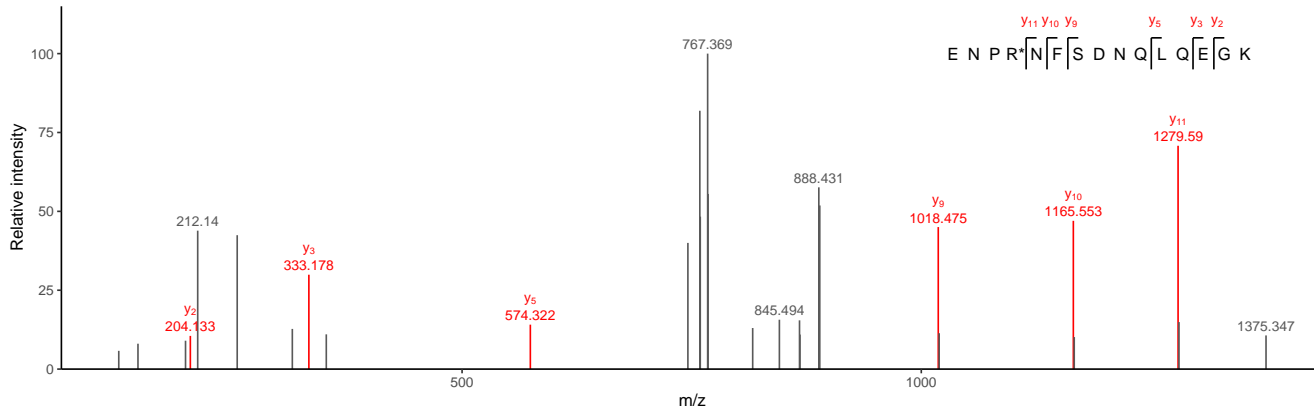

file: 02207a\_BD2-TUM\_mod\_citrullination\_s\_2\_01\_01-DDA-1h-R1, scan: 42615

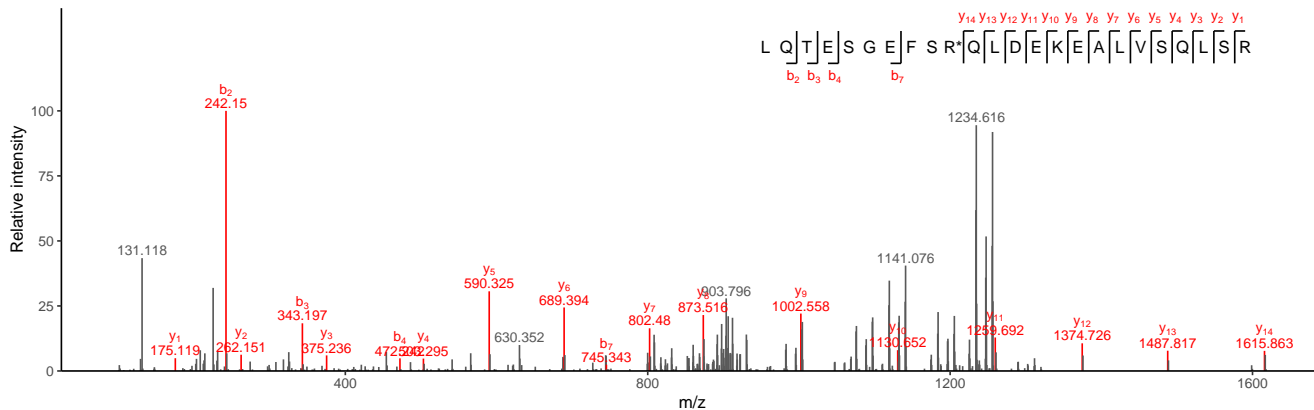

file: 02207a\_BB6-TUM\_mod\_citrullination\_L\_18\_01\_01-DDA-1h-R1, scan: 36953

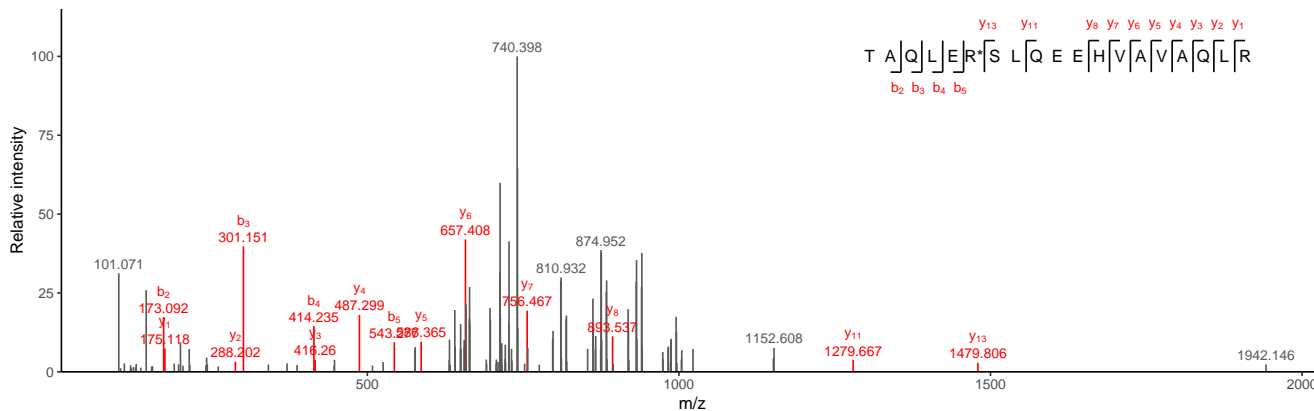

Ground truth: true, ionFinder classification: ambiguous

Ion type ■ Det ■ Amb ■ DetNL ■ ArtNL

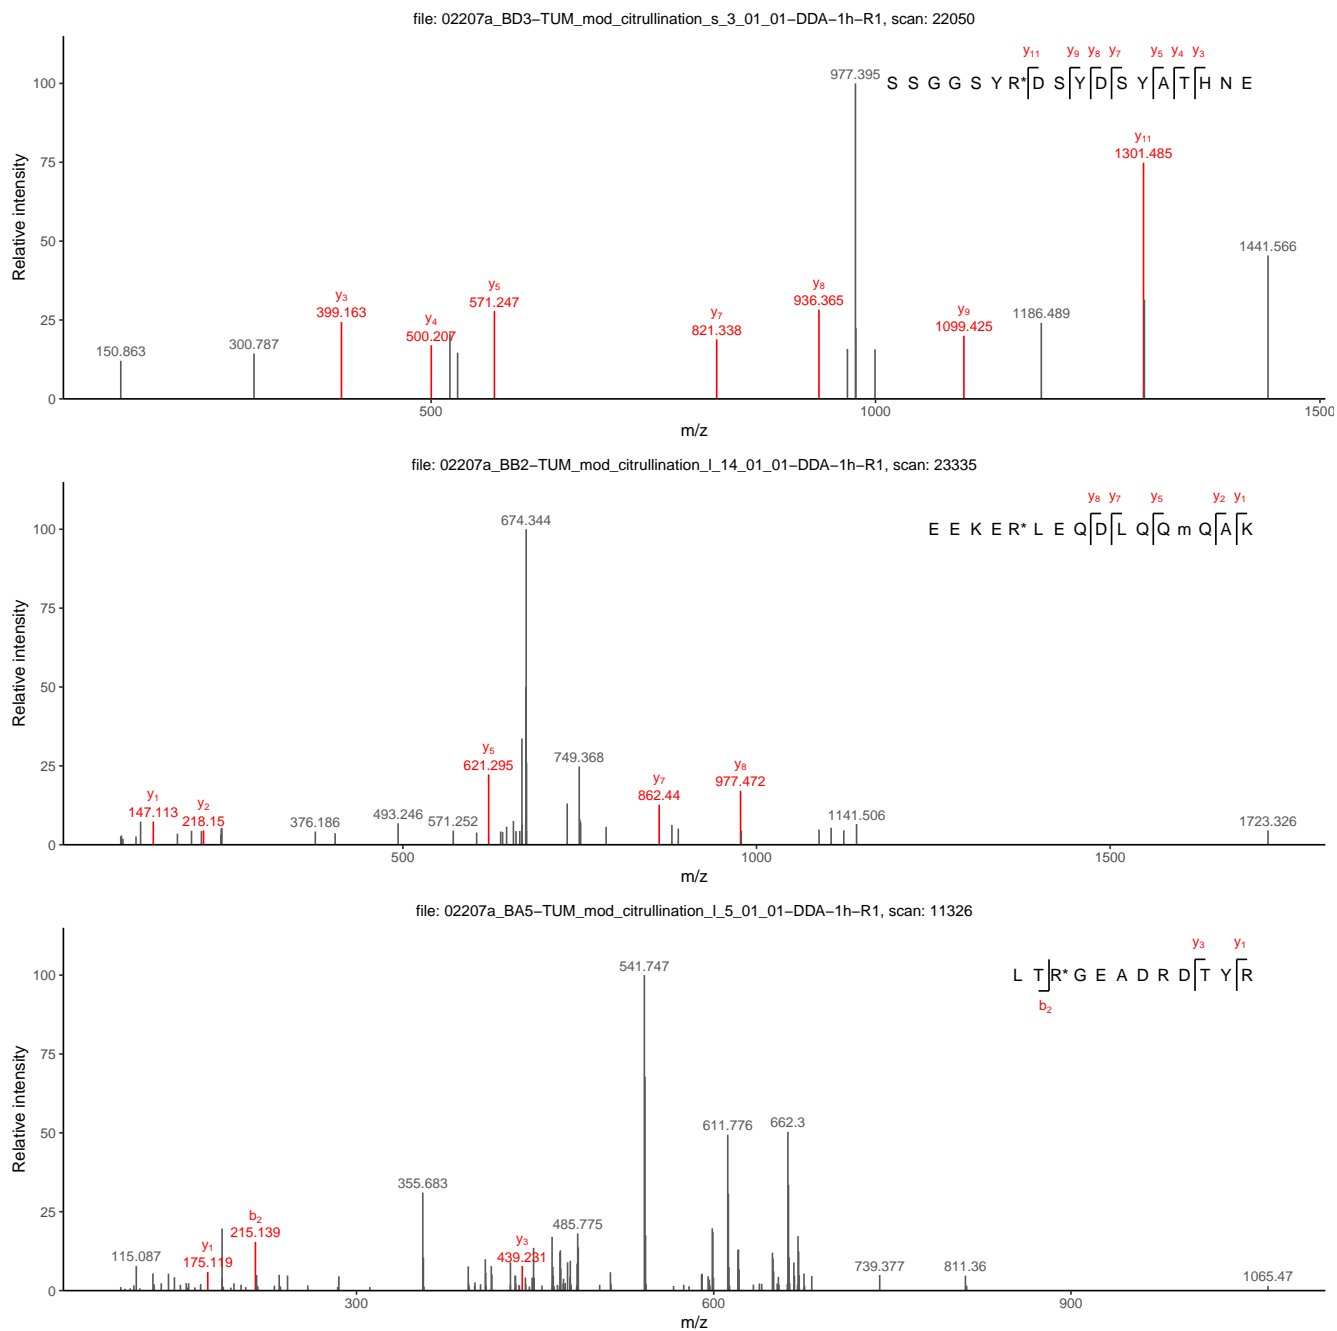

Figure S3. MS<sup>2</sup> spectra from 6 PSMs of synthetic spectra which were identified as *ambiguous* by ionFinder and classified as *true* in the ground truth dataset.

Ground truth: false, ionFinder classification: true

Ion type ■ Det ■ Amb ■ DetNL ■ ArtNL

file: 02207a\_BA6-TUM\_mod\_citrullination\_L\_6\_01\_01-DDA-1h-R1, scan: 23976

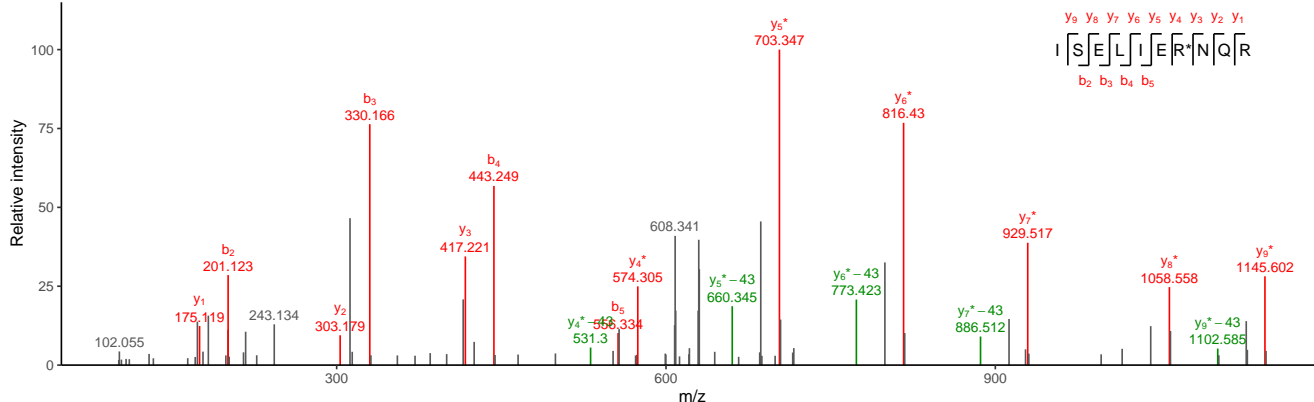

file: 02207a\_BA3-TUM\_mod\_citrullination\_L\_3\_01\_01-DDA-1h-R1, scan: 35297

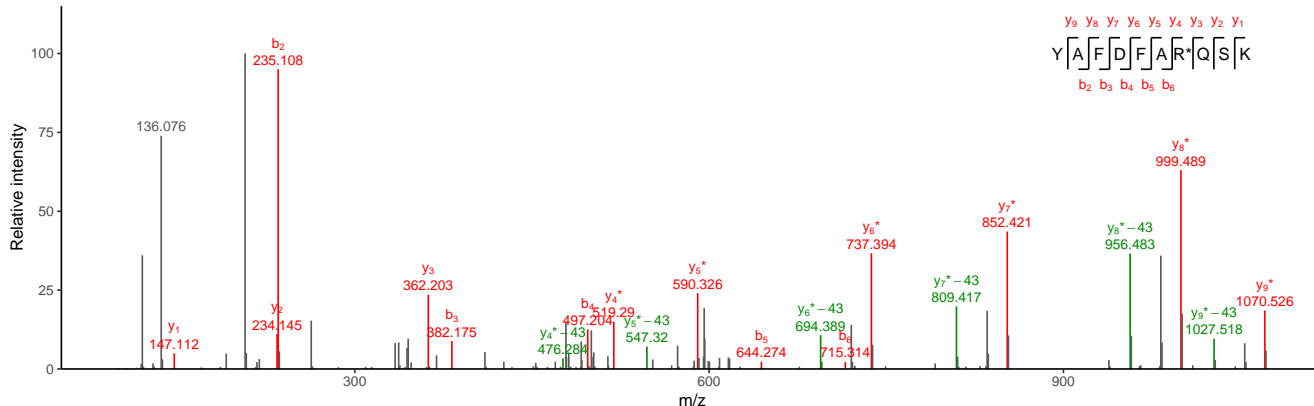

file: 02207a\_BA7-TUM\_mod\_citrullination\_L\_7\_01\_01-DDA-1h-R1, scan: 18332

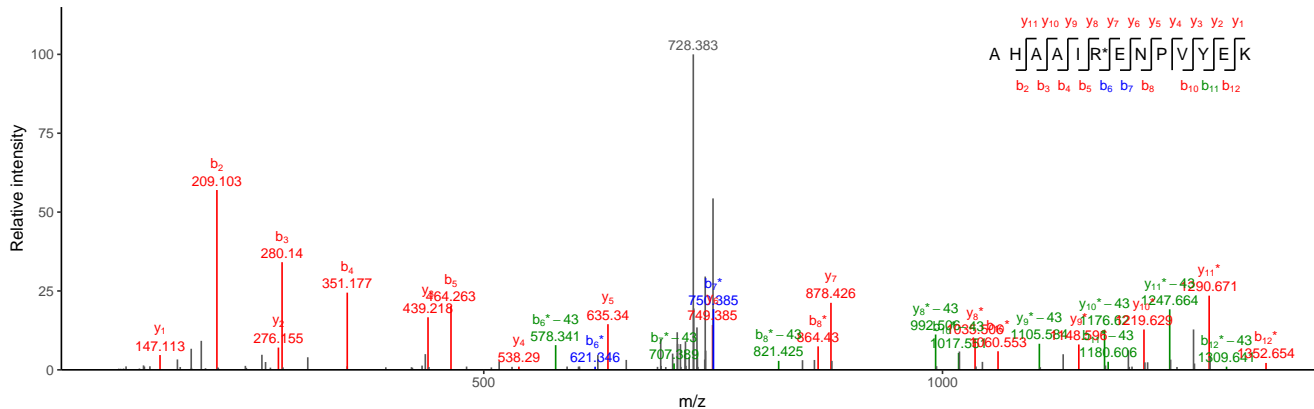

Ground truth: false, ionFinder classification: true

Ion type ■ Det ■ Amb ■ DetNL ■ ArtNL

file: 02207a\_BA9-TUM\_mod\_citrullination\_I\_9\_01\_01-DDA-1h-R1, scan: 30063

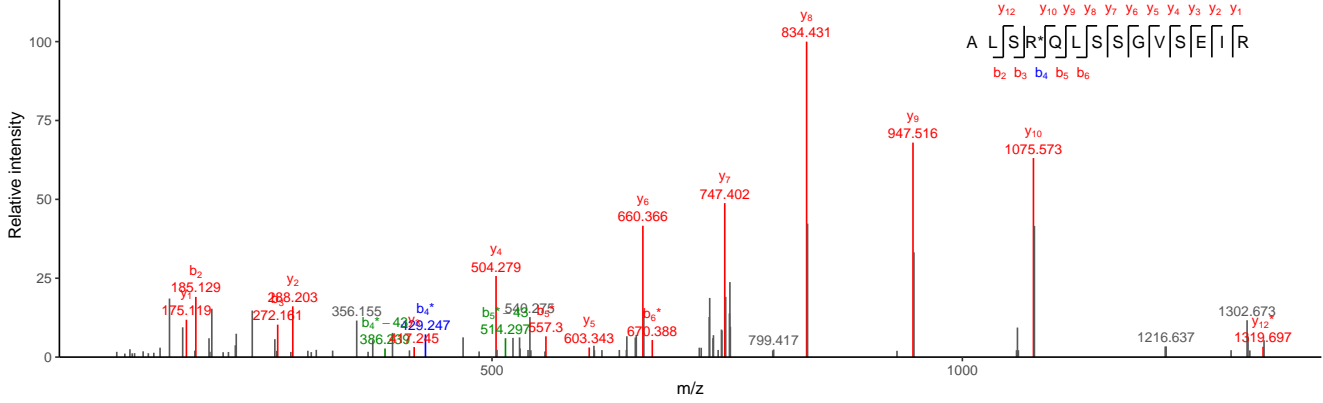

file: 02207a\_BB2-TUM\_mod\_citrullination\_I\_14\_01\_01-DDA-1h-R1, scan: 47188

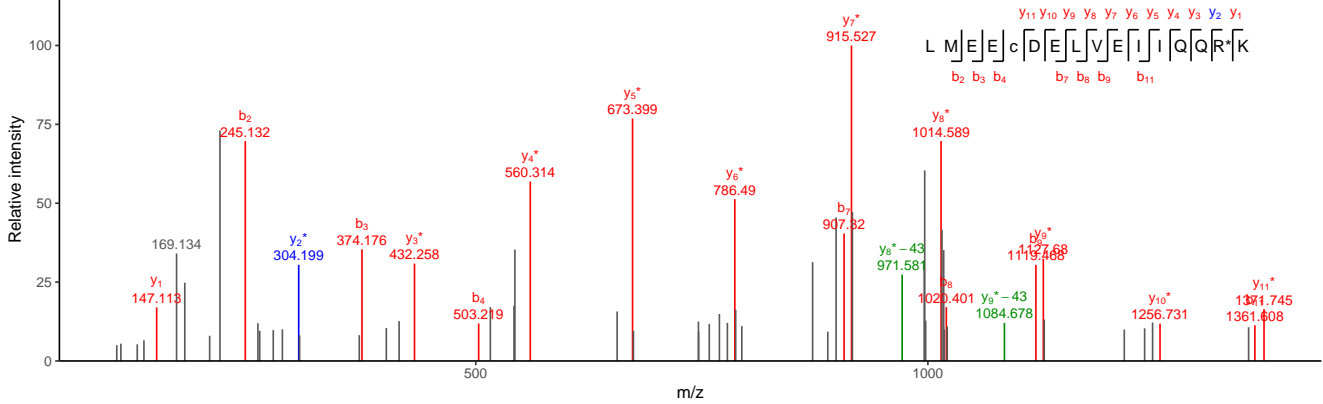

file: 02207a\_BB2-TUM\_mod\_citrullination\_I\_14\_01\_01-DDA-1h-R1, scan: 46872

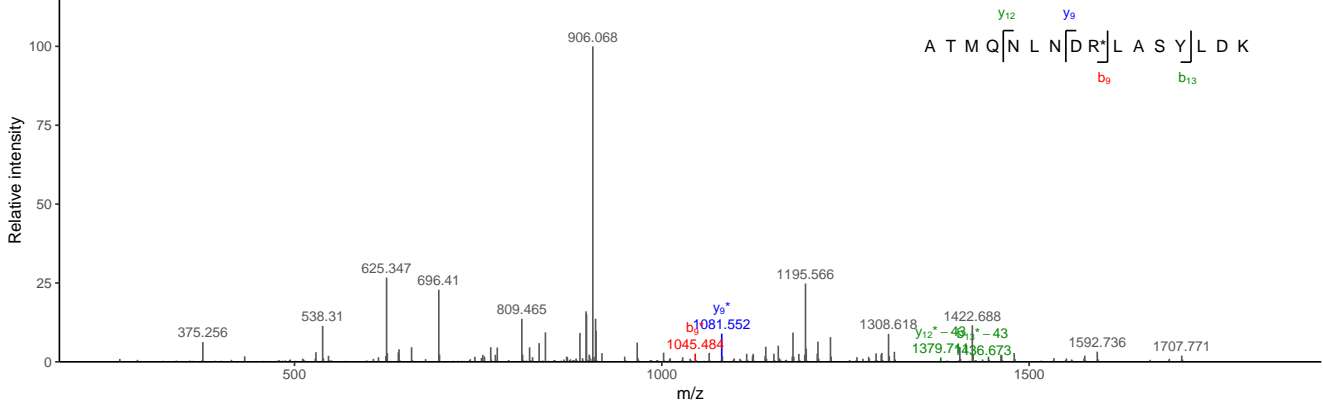

Ground truth: false, ionFinder classification: true

Ion type ■ Det ■ Amb ■ DetNL ■ ArtNL

file: 02207a\_BA3-TUM\_mod\_citrullination\_L\_3\_01\_01-DDA-1h-R1, scan: 35592

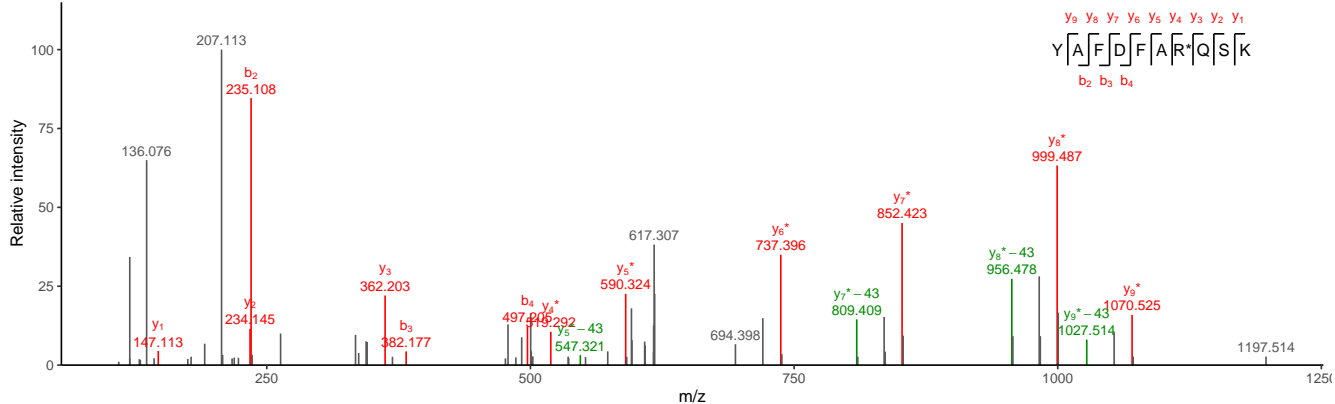

file: 02207a\_BA9-TUM\_mod\_citrullination\_L\_9\_01\_01-DDA-1h-R1, scan: 38724

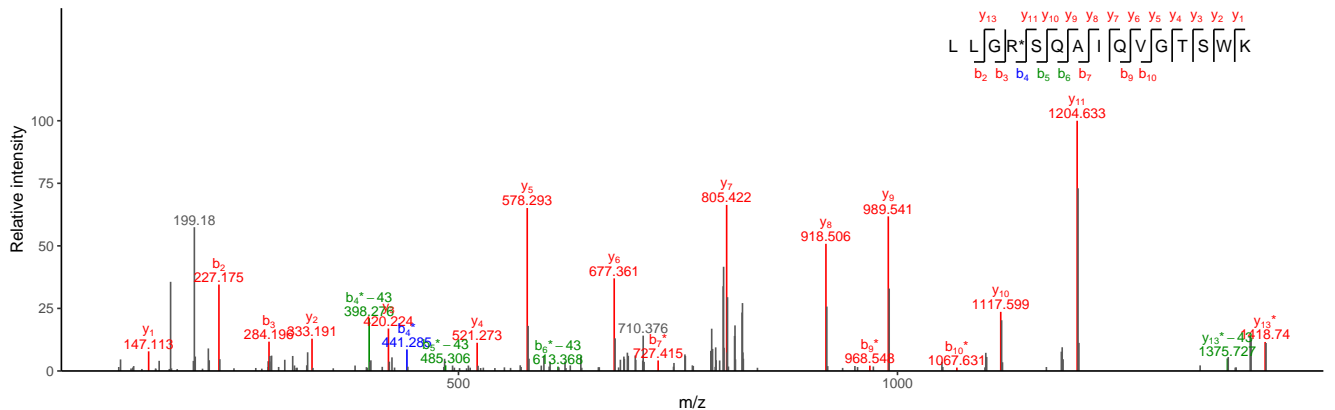

file: 02207a\_BA1-TUM\_mod\_citrullination\_L\_1\_01\_01-DDA-1h-R1, scan: 30062

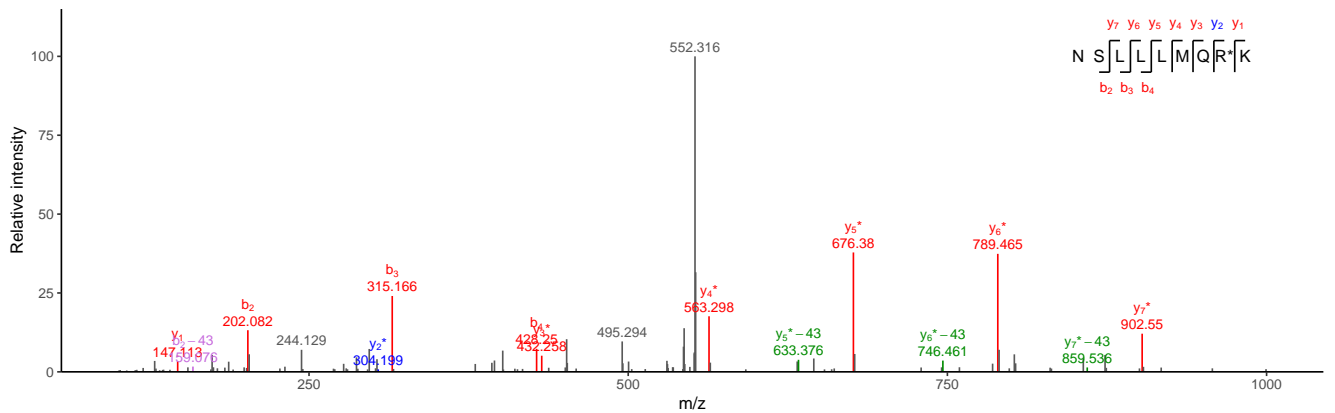

Ground truth: false, ionFinder classification: true

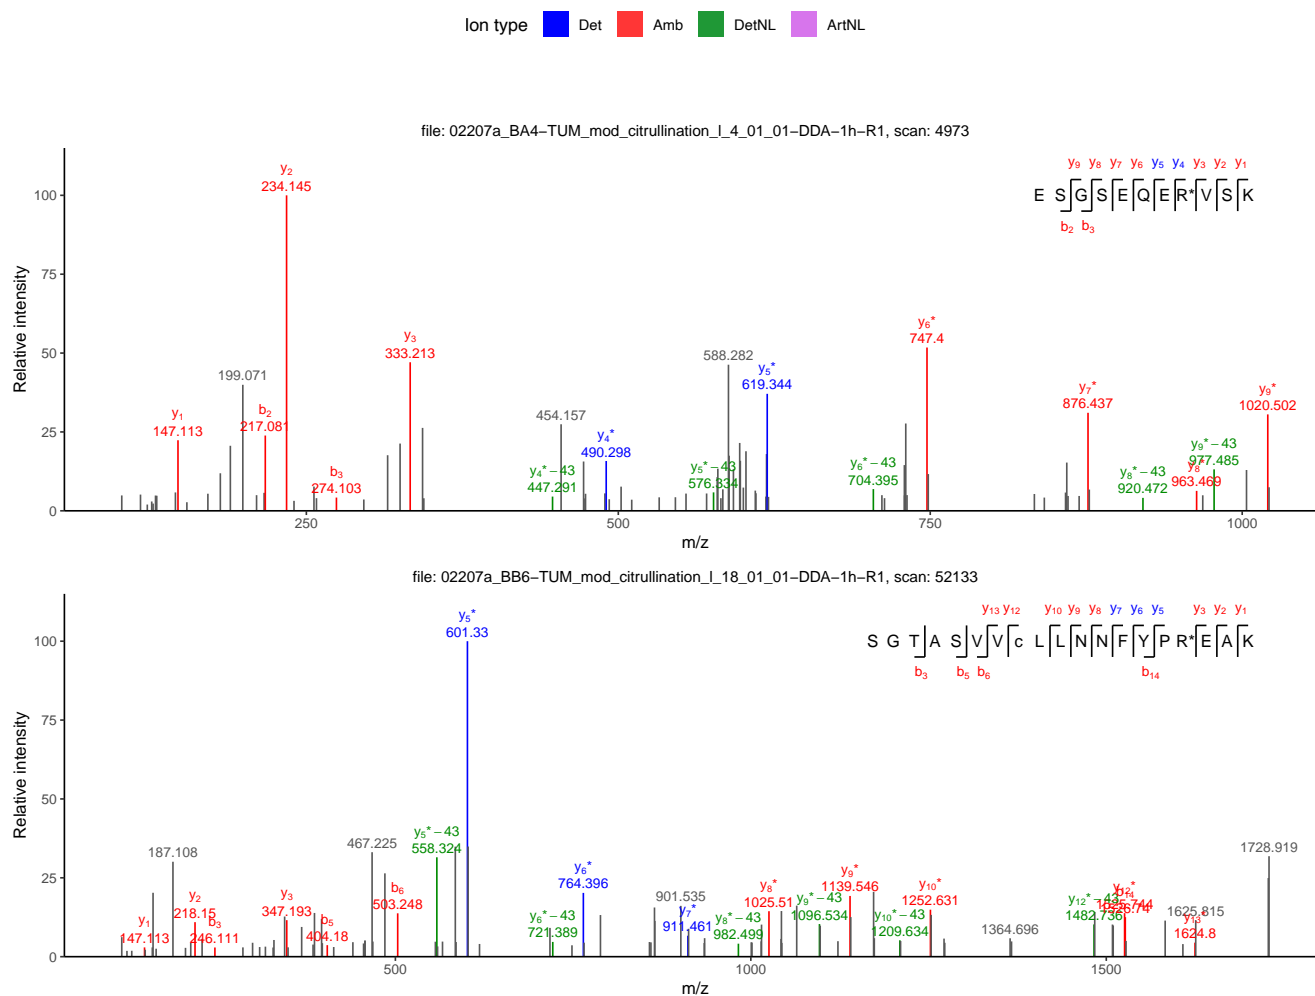

**Figure S4.** MS<sup>2</sup> spectra from 11 PSMs of synthetic spectra which were identified as *true* by ionFinder and classified as *false* in the ground truth dataset.

Ground truth: false, ionFinder classification: likely

Ion type ■ Det ■ Amb ■ DetNL ■ ArtNL

file: 02207a\_BB4-TUM\_mod\_citrullination\_I\_16\_01\_01-DDA-1h-R1, scan: 43405

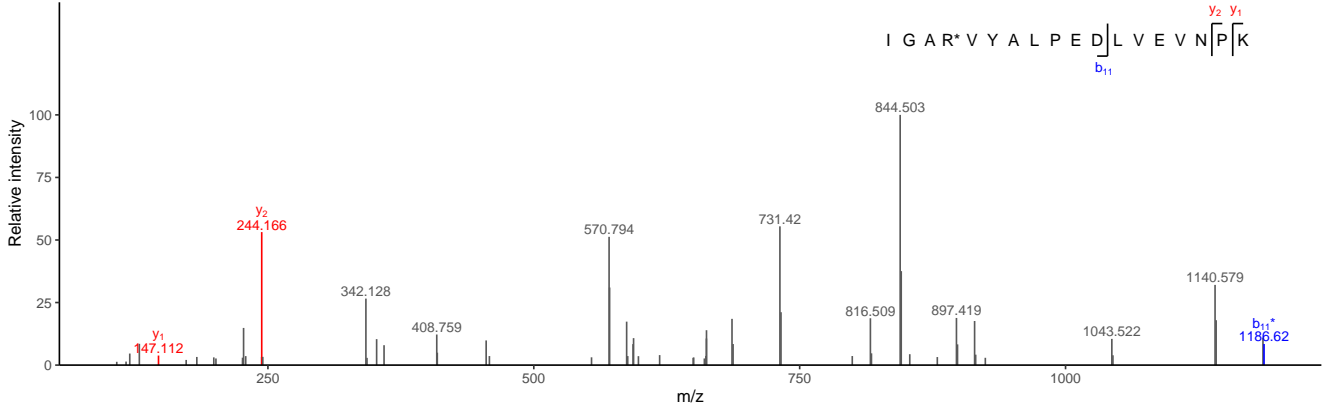

file: 02207a\_BB9-TUM\_mod\_citrullination\_I\_21\_01\_01-DDA-1h-R1, scan: 22655

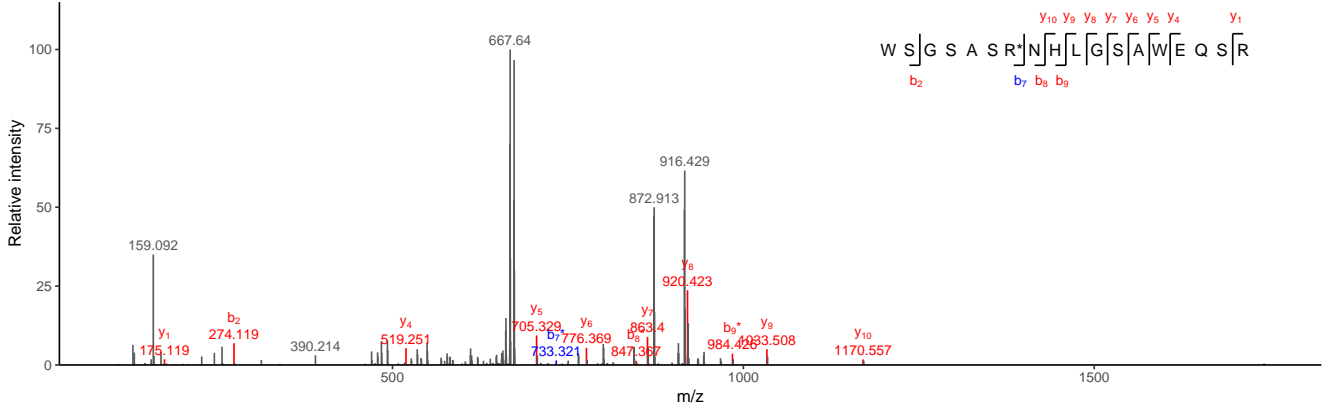

file: 02207a\_BA11-TUM\_mod\_citrullination\_I\_11\_01\_01-DDA-1h-R1, scan: 12569

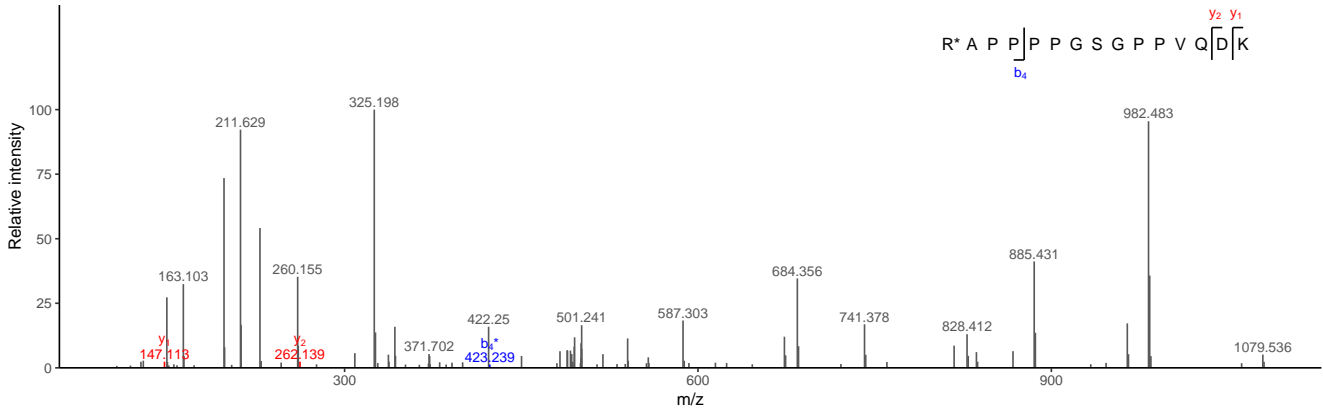



Ground truth: false, ionFinder classification: likely

Ion type ■ Det ■ Amb ■ DetNL ■ ArtNL

file: 02207a\_BB3-TUM\_mod\_citrullination\_L15\_01\_01-DDA-1h-R1, scan: 34324

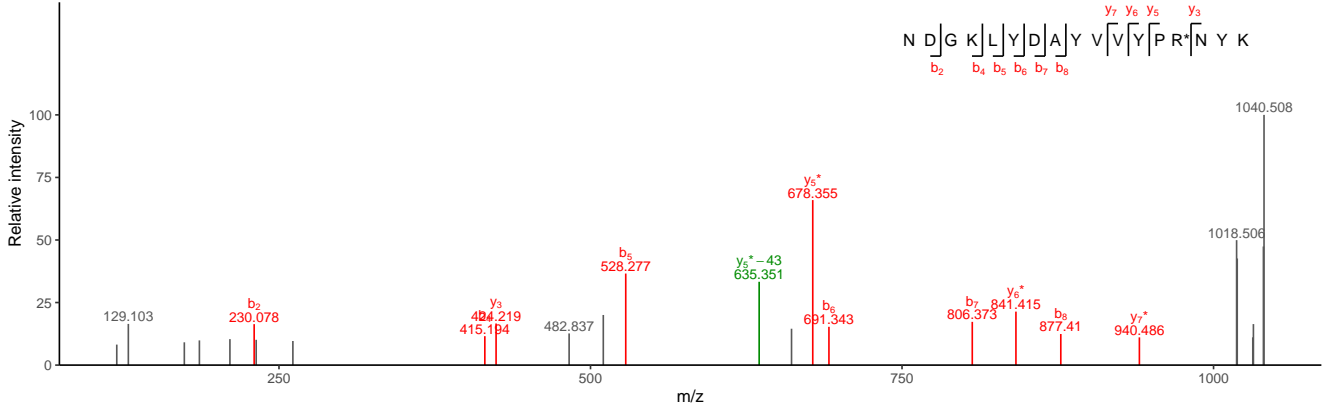

file: 02207a\_BA1-TUM\_mod\_citrullination\_L1\_01\_01-DDA-1h-R1, scan: 11317

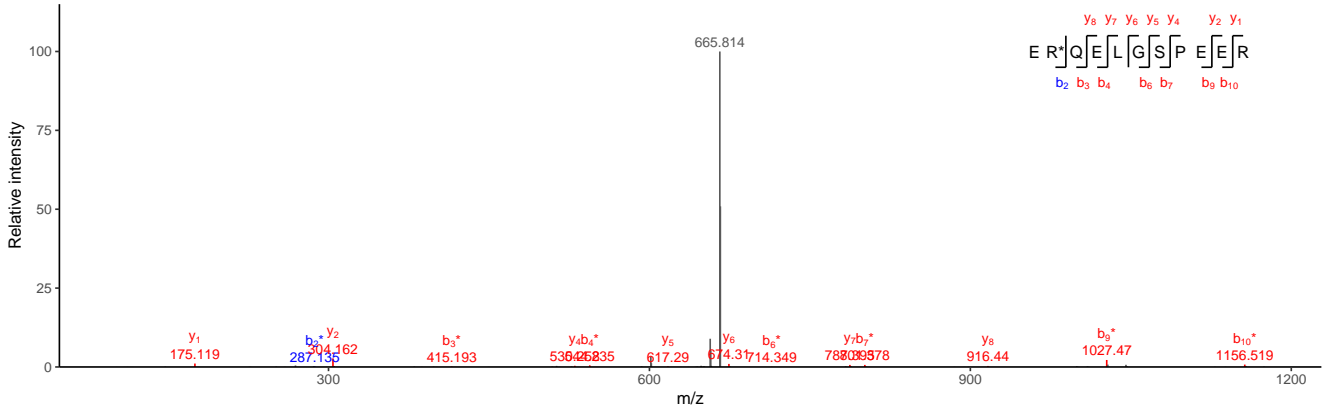

file: 02207a\_BB1-TUM\_mod\_citrullination\_L13\_01\_01-DDA-1h-R1, scan: 25583

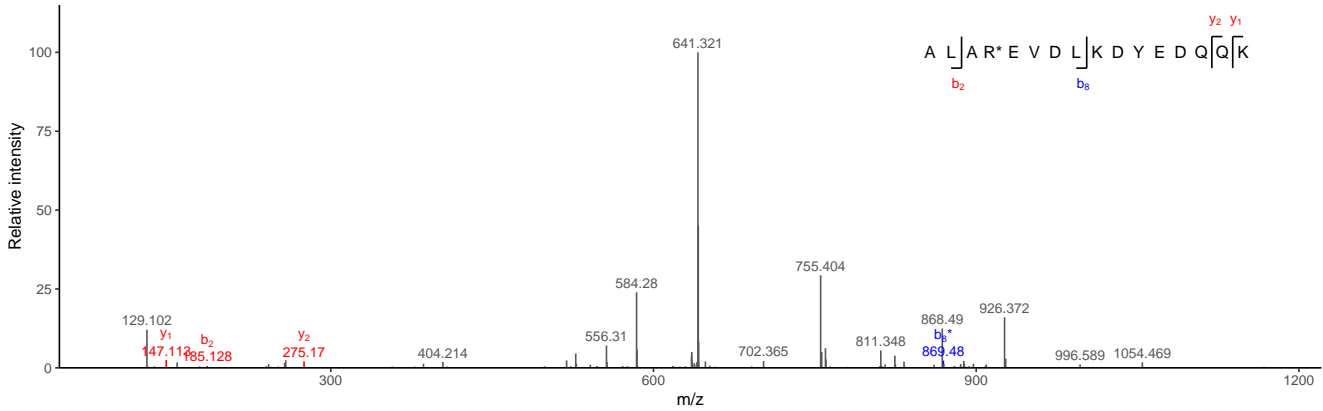

Ground truth: false, ionFinder classification: likely

Ion type ■ Det ■ Amb ■ DetNL ■ ArtNL

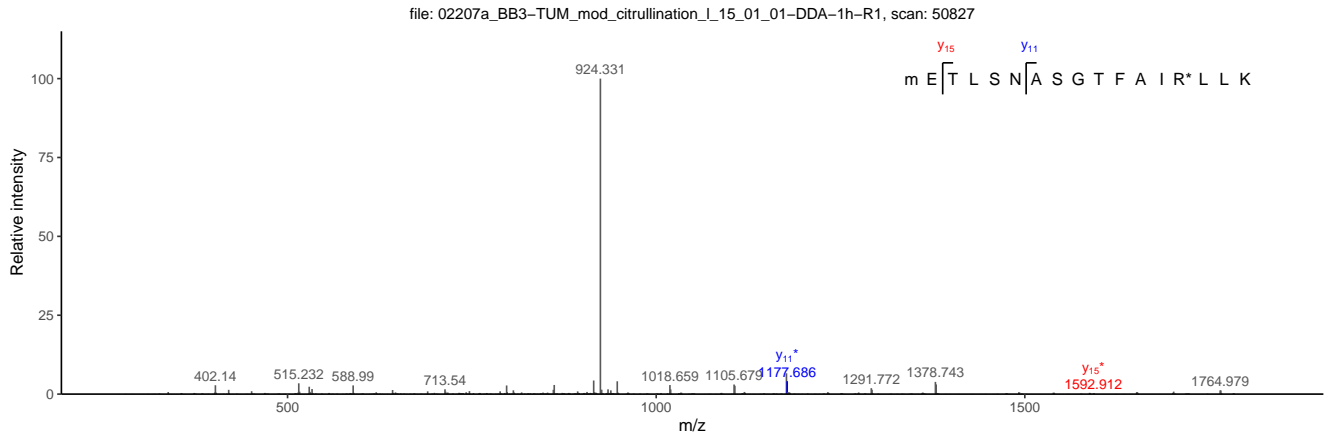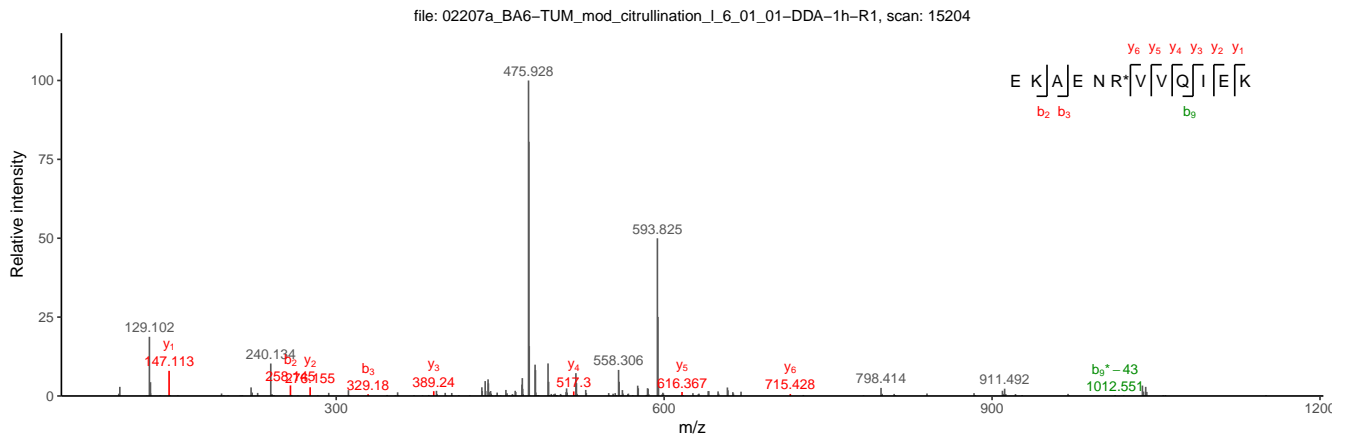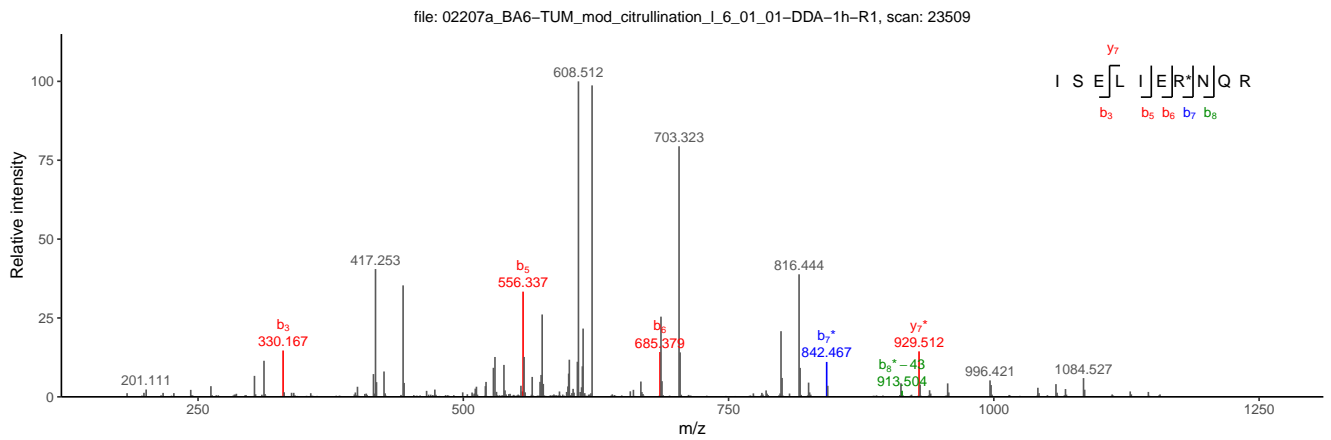

Ground truth: false, ionFinder classification: likely

Ion type ■ Det ■ Amb ■ DetNL ■ ArtNL

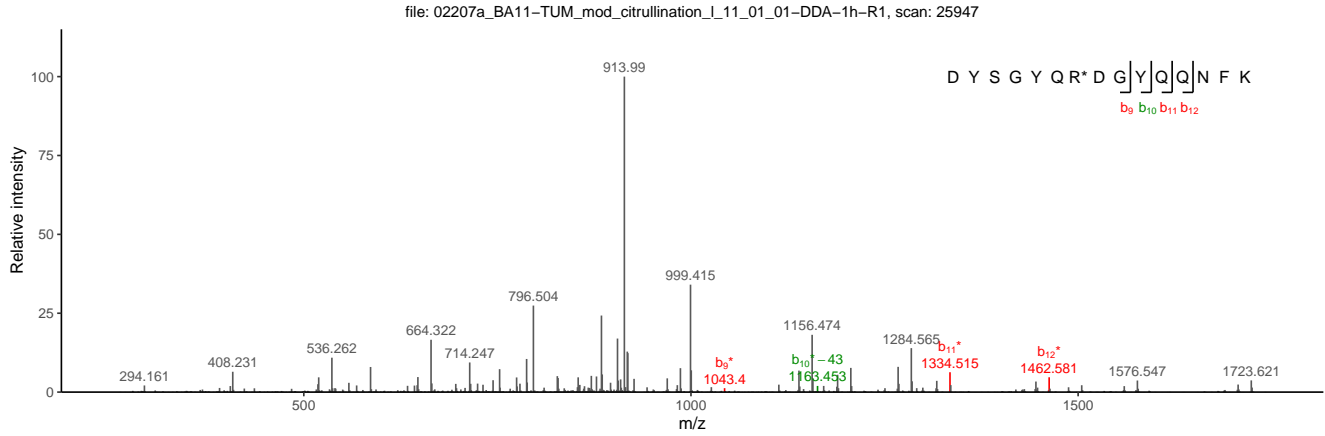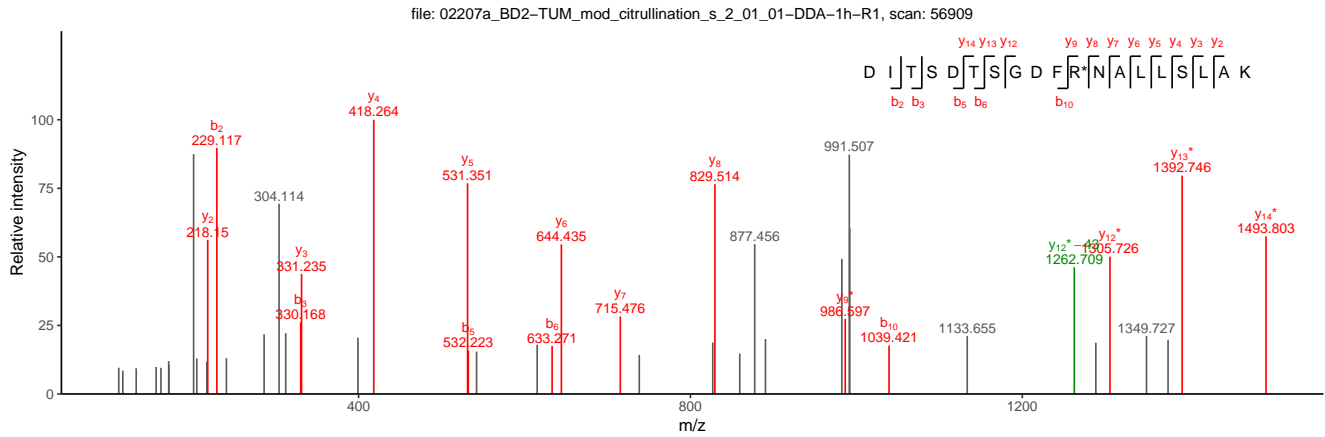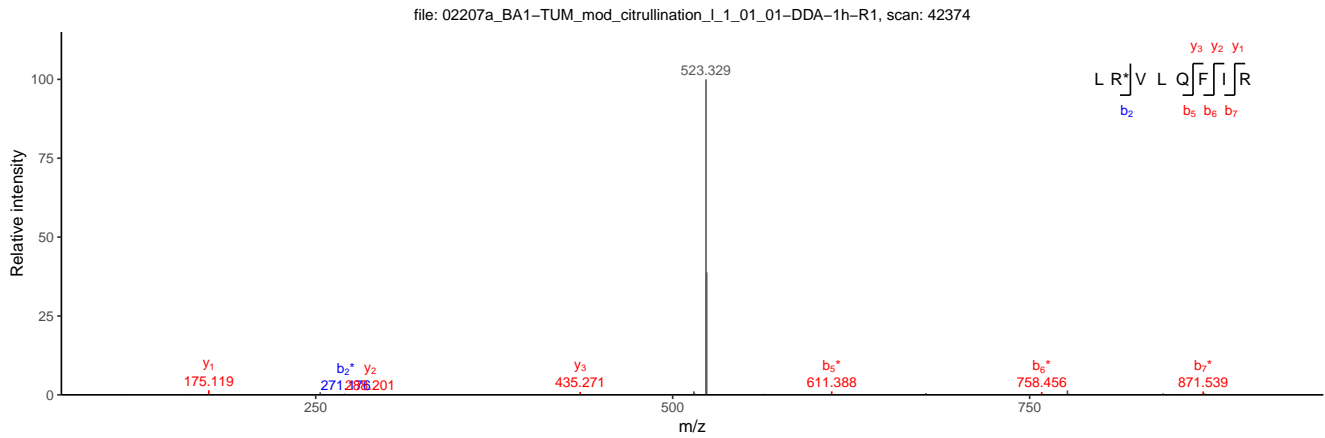

Ground truth: false, ionFinder classification: likely

Ion type ■ Det ■ Amb ■ DetNL ■ ArtNL

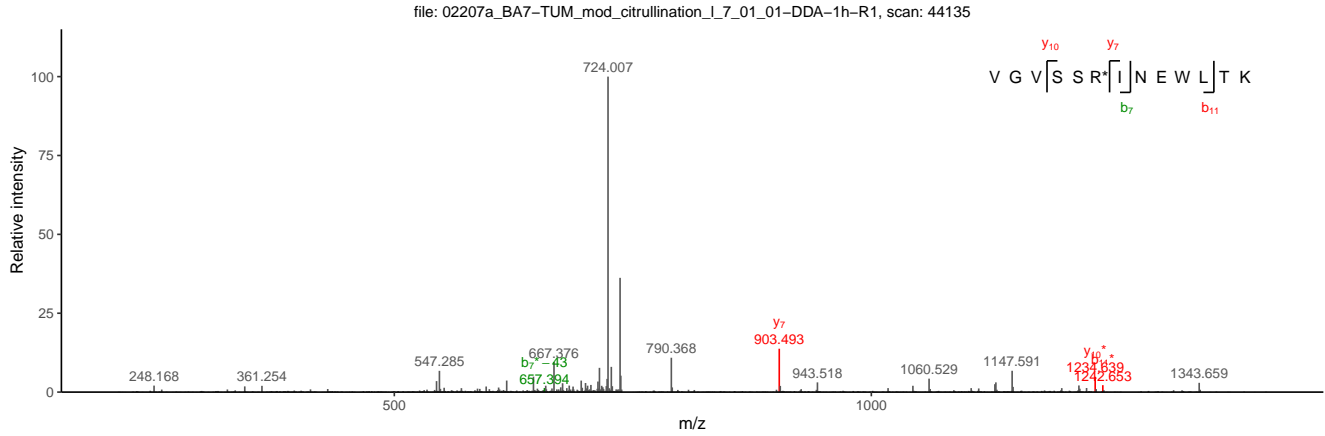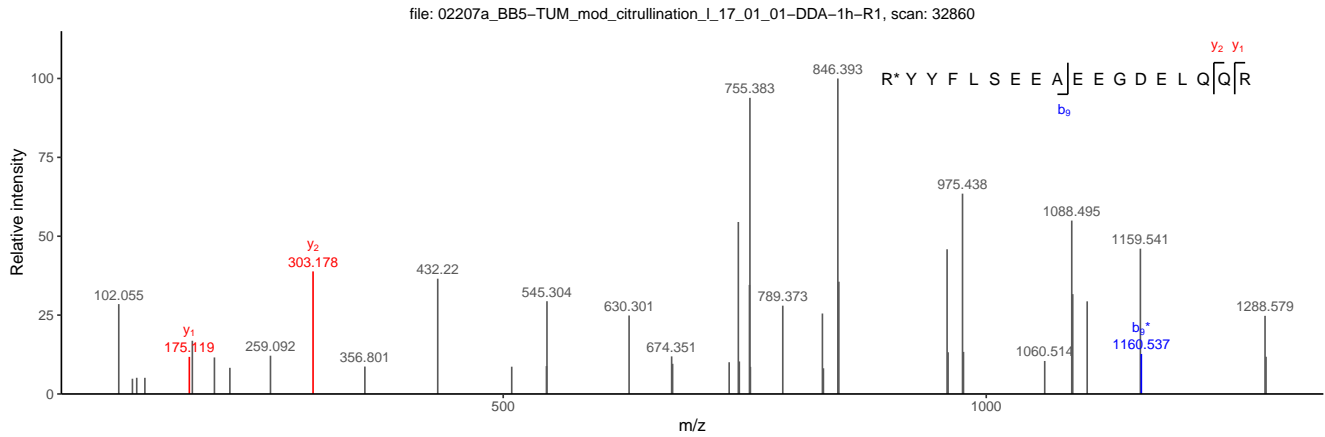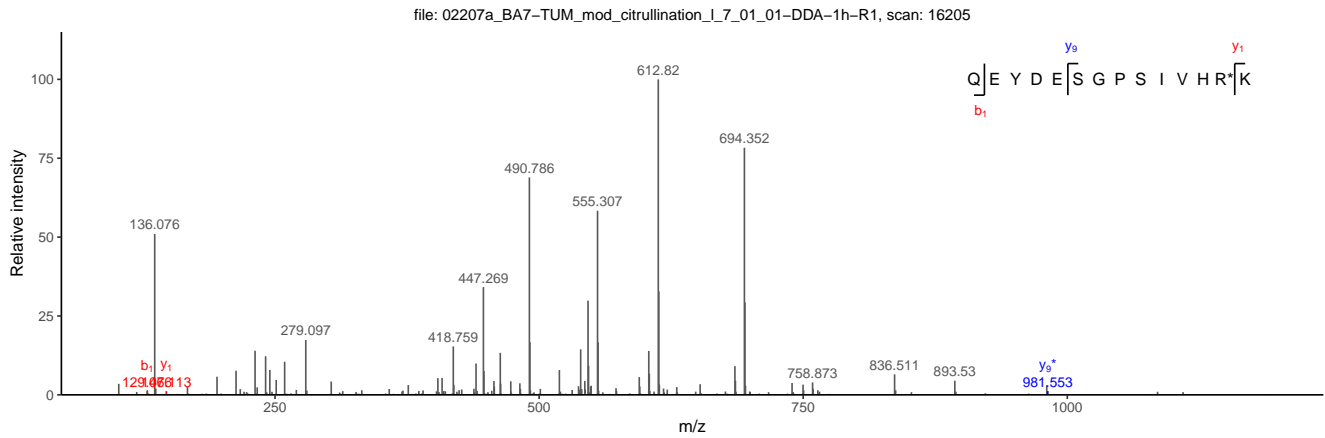

Ground truth: false, ionFinder classification: likely

Ion type ■ Det ■ Amb ■ DetNL ■ ArtNL

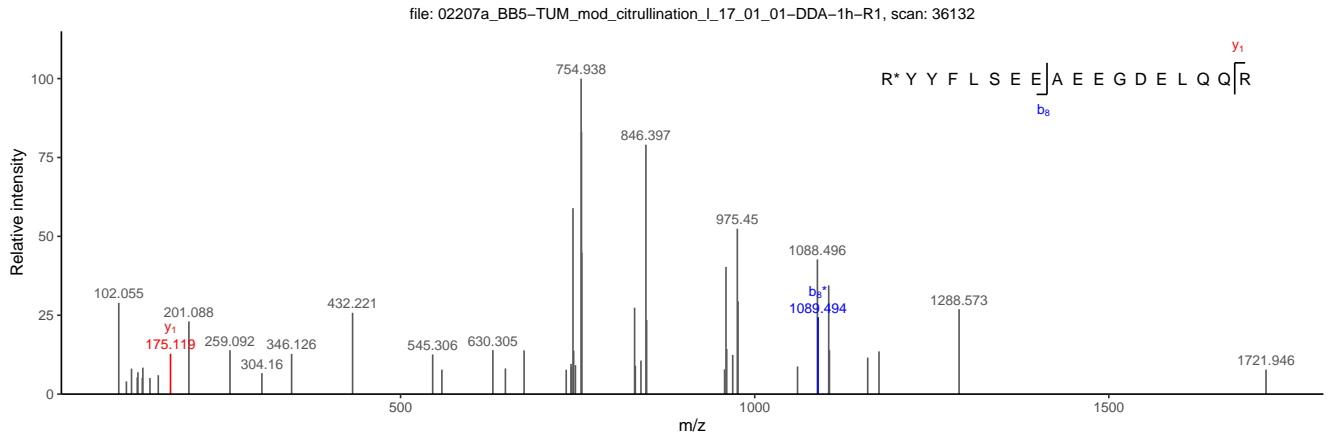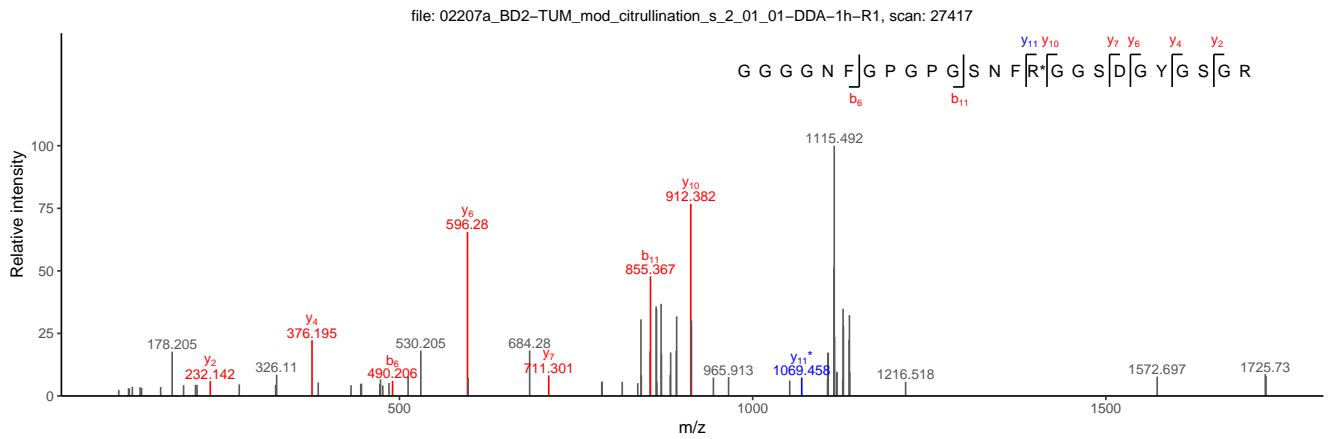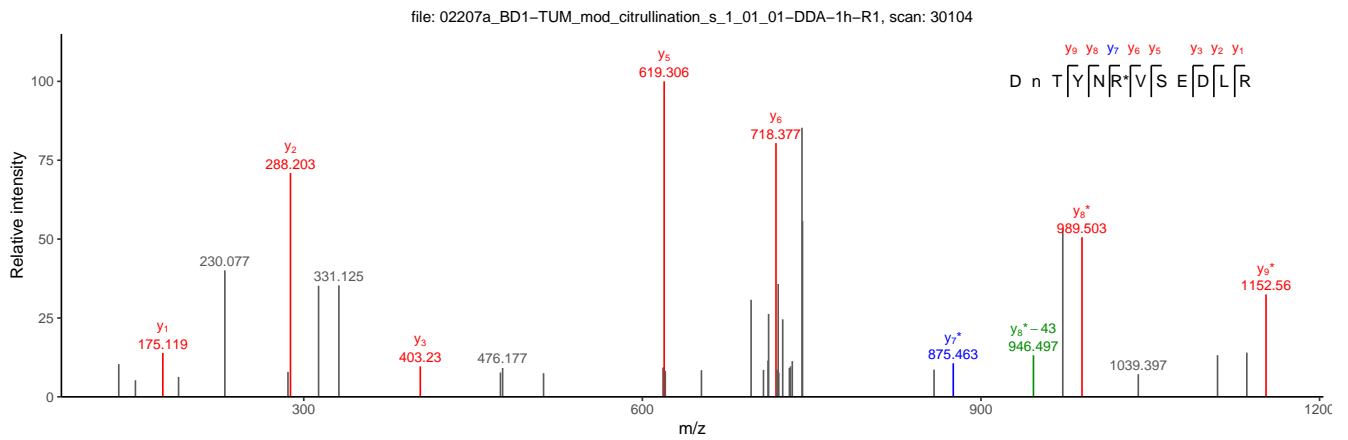

Ground truth: false, ionFinder classification: likely

Ion type ■ Det ■ Amb ■ DetNL ■ ArtNL

file: 02207a\_BB3-TUM\_mod\_citrullination\_I\_15\_01\_01-DDA-1h-R1, scan: 57647

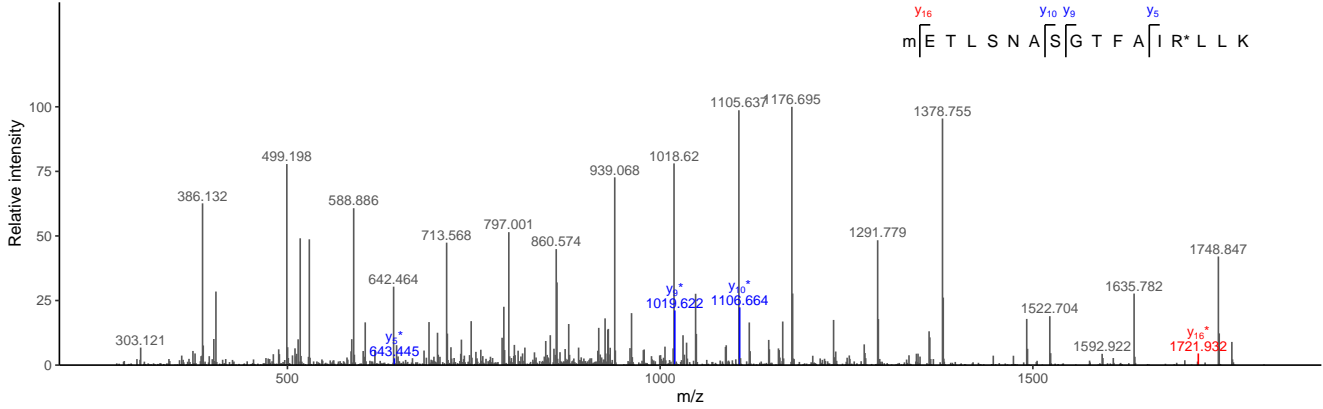

file: 02207a\_BB2-TUM\_mod\_citrullination\_I\_14\_01\_01-DDA-1h-R1, scan: 19361

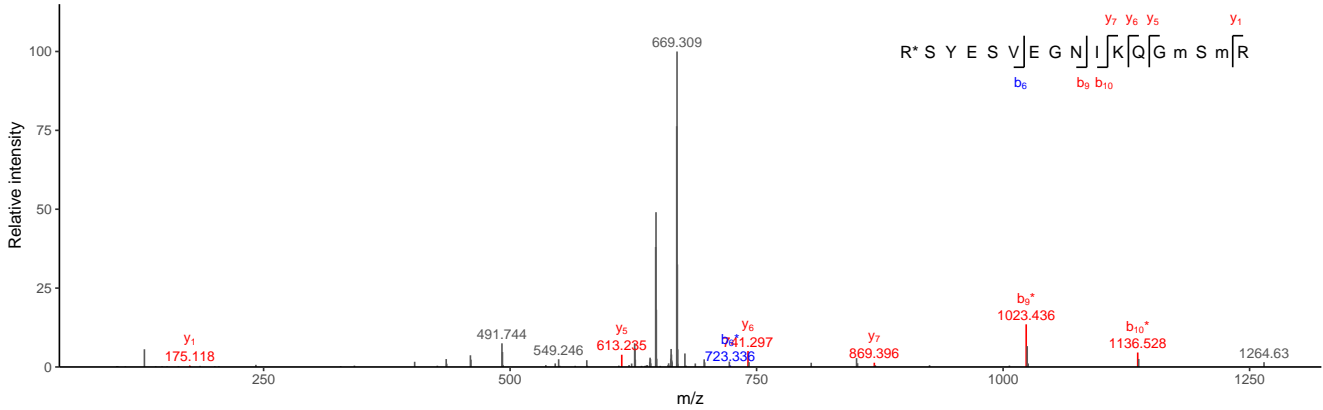

file: 02207a\_BA8-TUM\_mod\_citrullination\_I\_8\_01\_01-DDA-1h-R1, scan: 51189

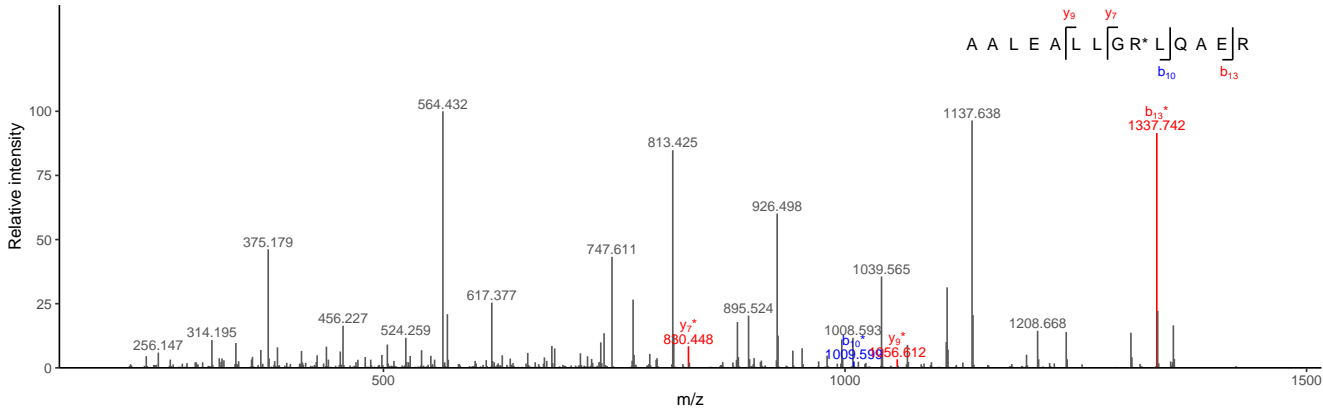

Ground truth: false, ionFinder classification: likely

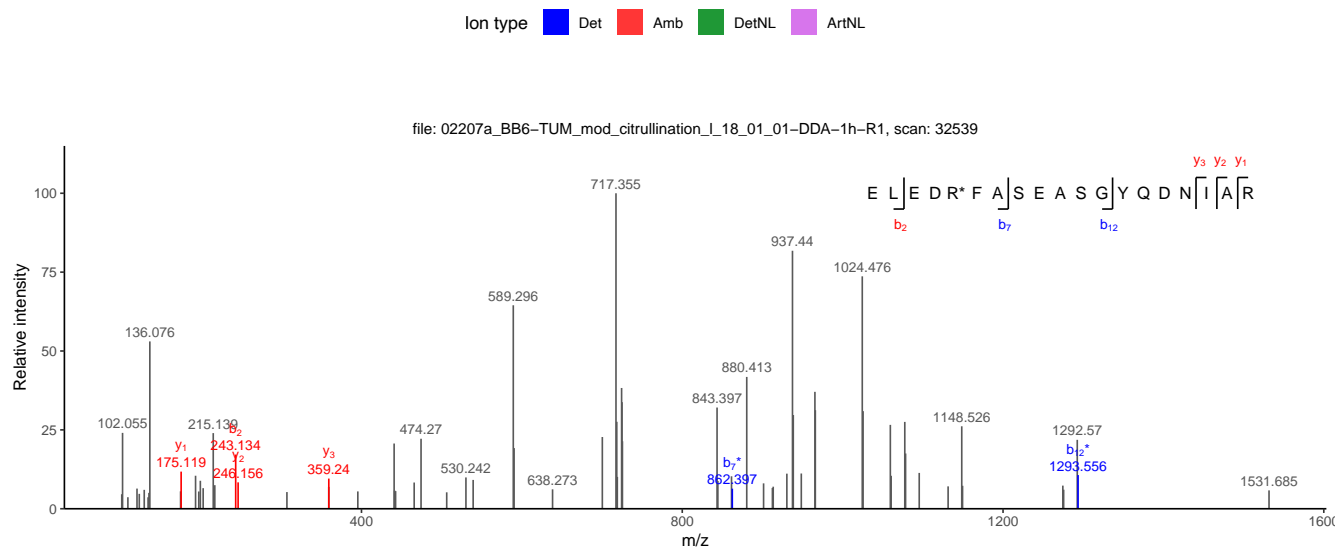

**Figure S5.** MS<sup>2</sup> spectra from 22 PSMs of synthetic spectra which were identified as *likely* by ionFinder and classified as *false* in the ground truth dataset.

Ground truth: false, ionFinder classification: ambiguous

Ion type ■ Det ■ Amb ■ DetNL ■ ArtNL

file: 02207a\_BB3-TUM\_mod\_citrullination\_I\_15\_01\_01-DDA-1h-R1, scan: 30437

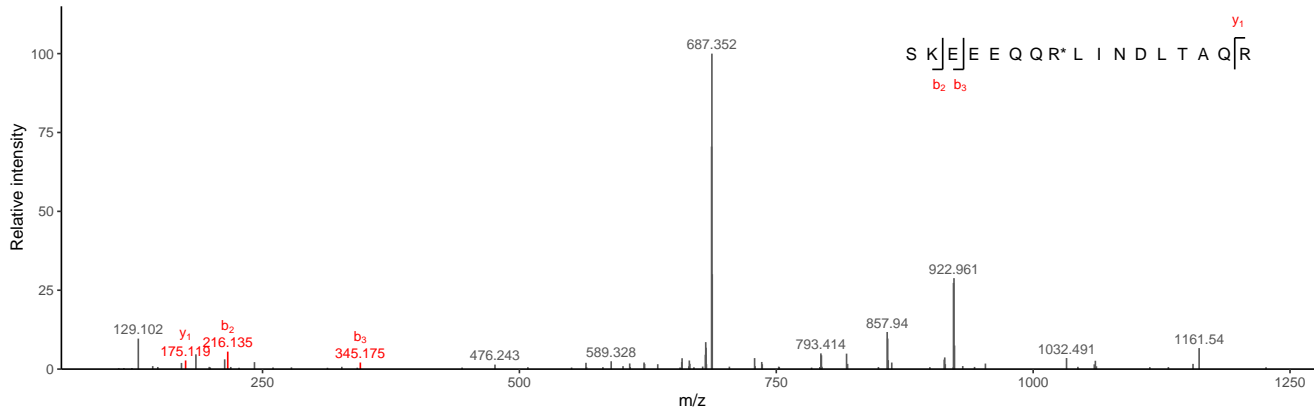

file: 02207a\_BA2-TUM\_mod\_citrullination\_I\_2\_01\_01-DDA-1h-R1, scan: 25999

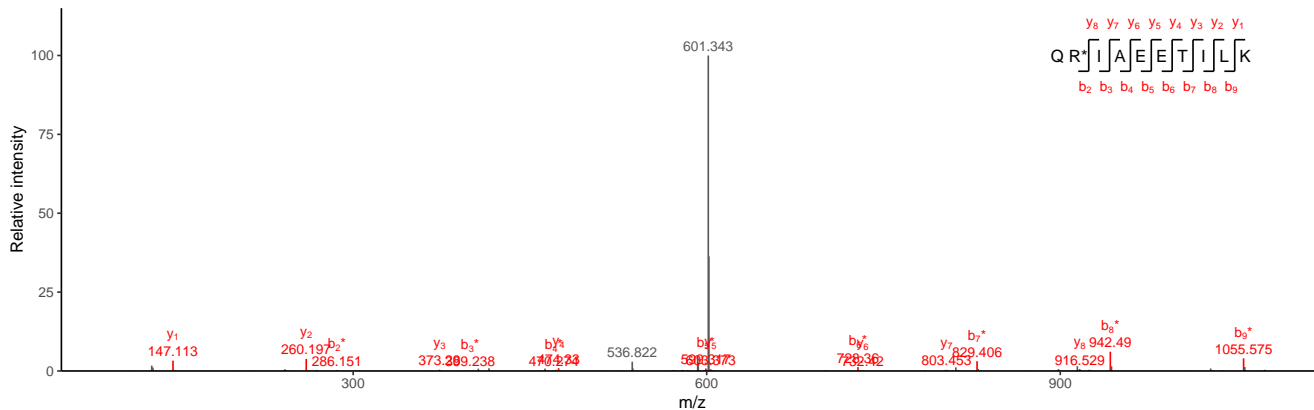

file: 02207a\_BA3-TUM\_mod\_citrullination\_I\_3\_01\_01-DDA-1h-R1, scan: 14209

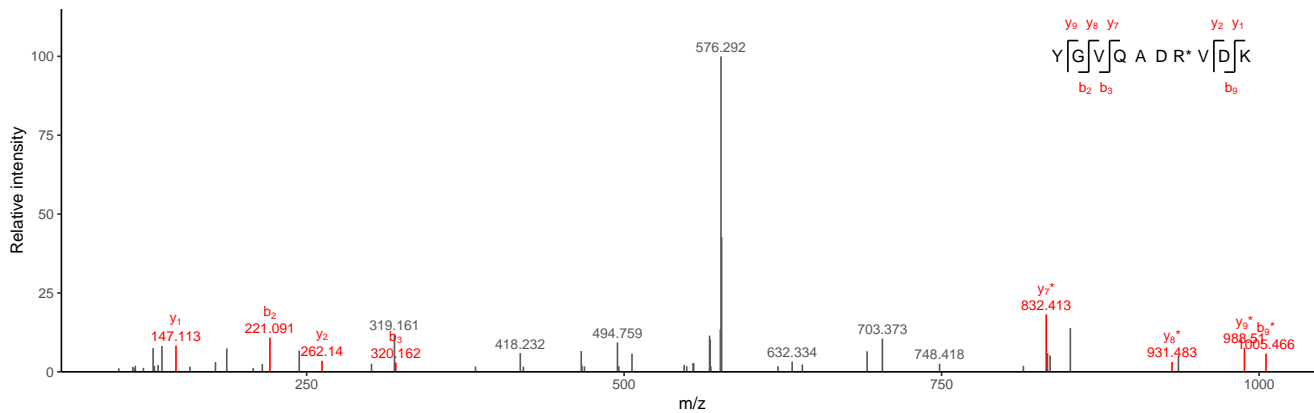



Ground truth: false, ionFinder classification: ambiguous

Ion type ■ Det ■ Amb ■ DetNL ■ ArtNL

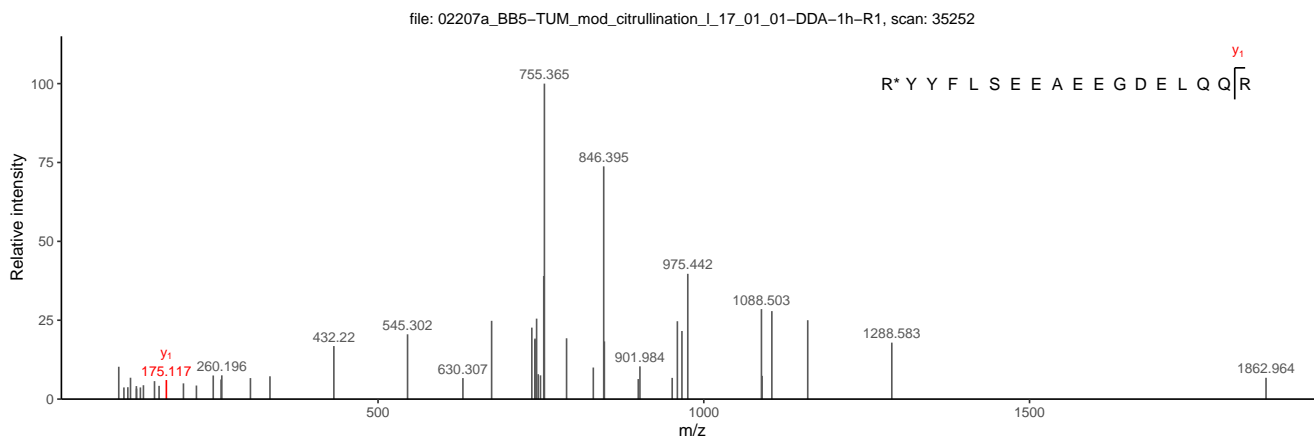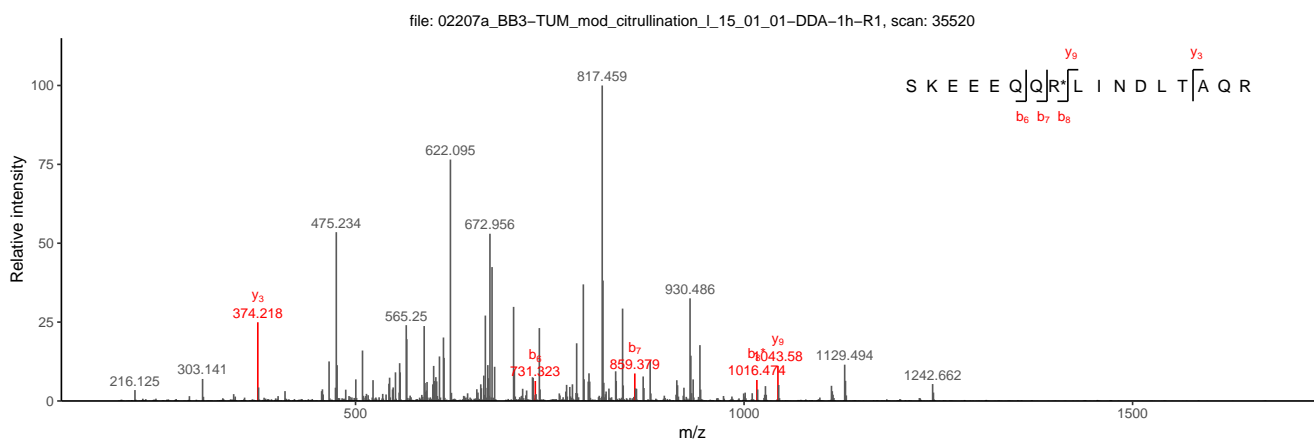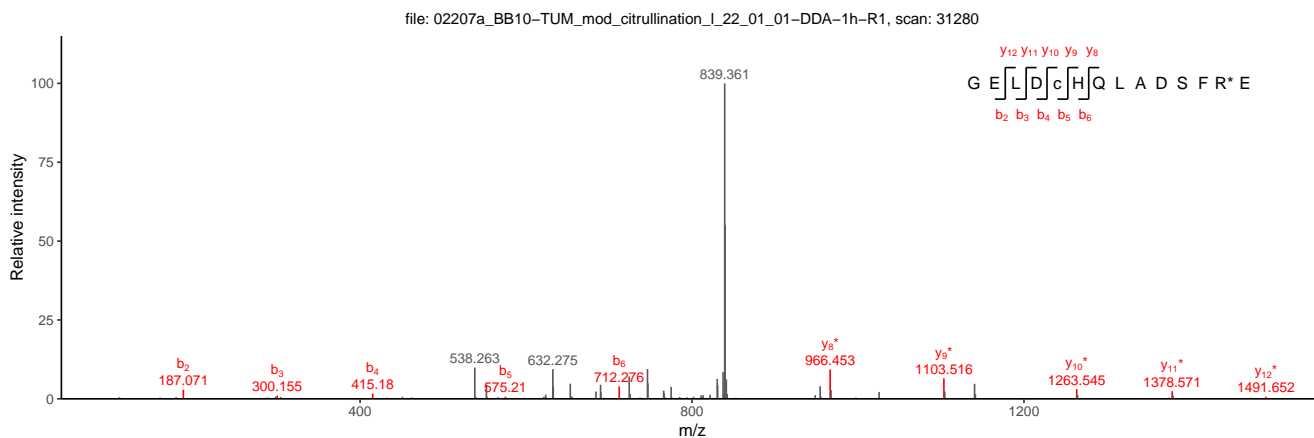

Ground truth: false, ionFinder classification: ambiguous

Ion type ■ Det ■ Amb ■ DetNL ■ ArtNL

file: 02207a\_BB2-TUM\_mod\_citrullination\_I\_14\_01\_01-DDA-1h-R1, scan: 19663

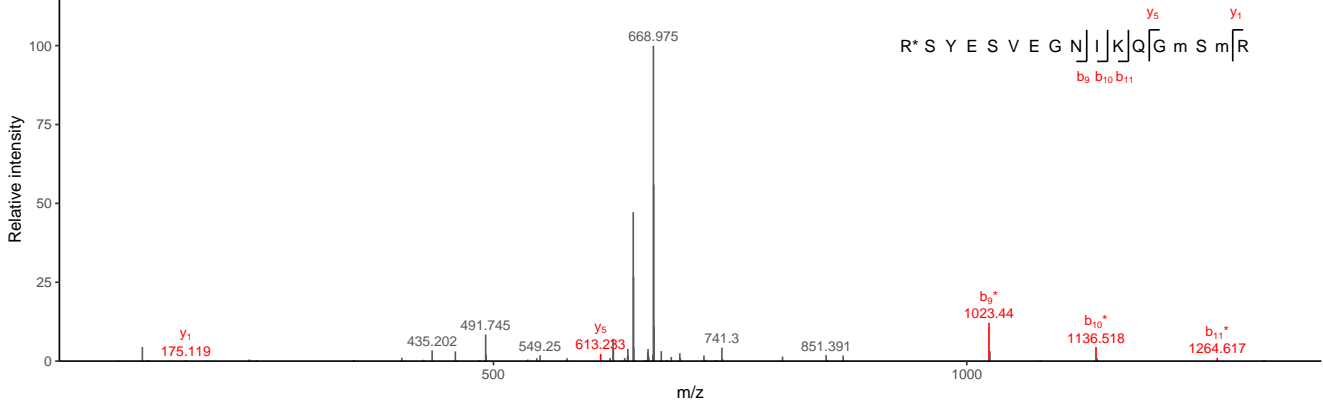

file: 02207a\_BA9-TUM\_mod\_citrullination\_I\_9\_01\_01-DDA-1h-R1, scan: 31899

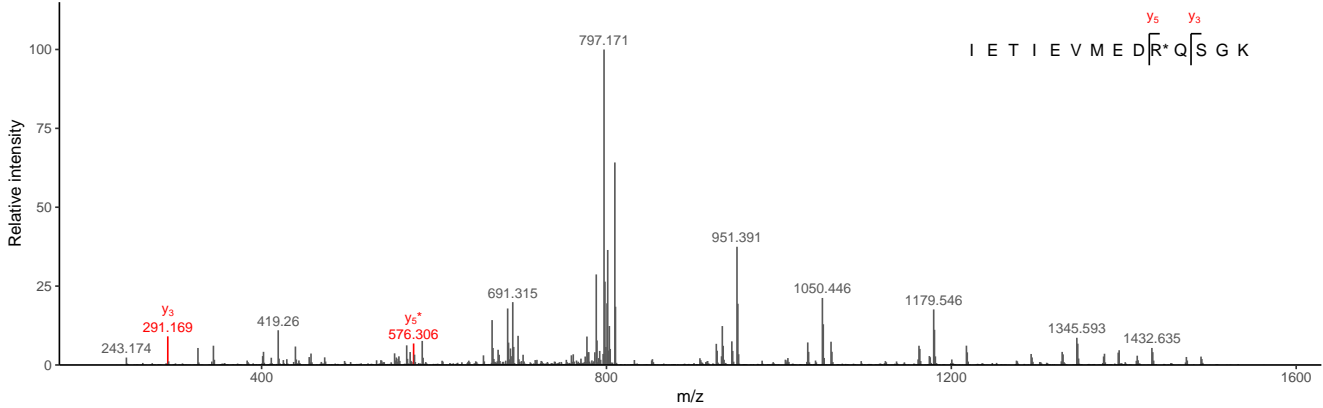

file: 02207a\_BA3-TUM\_mod\_citrullination\_I\_3\_01\_01-DDA-1h-R1, scan: 12406

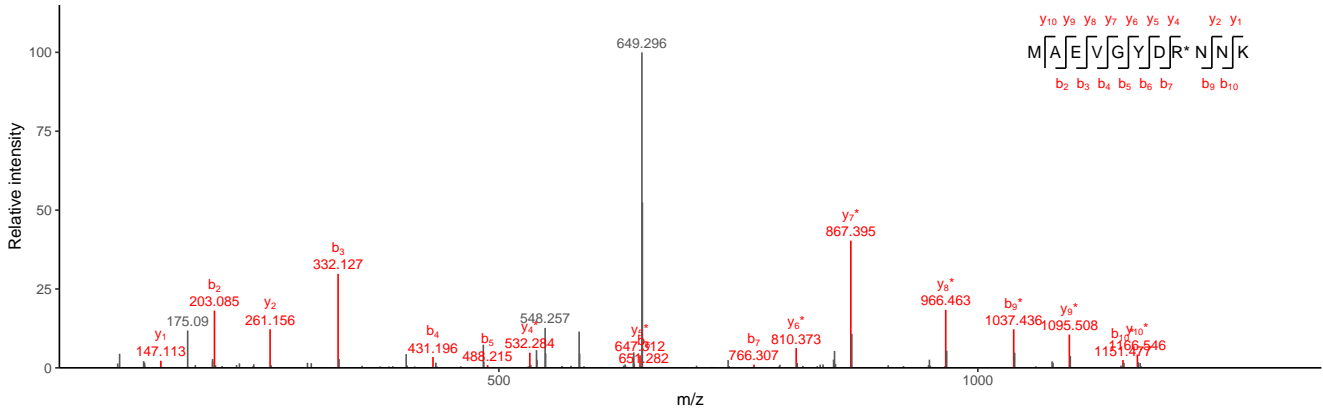

Ground truth: false, ionFinder classification: ambiguous

Ion type ■ Det ■ Amb ■ DetNL ■ ArtNL

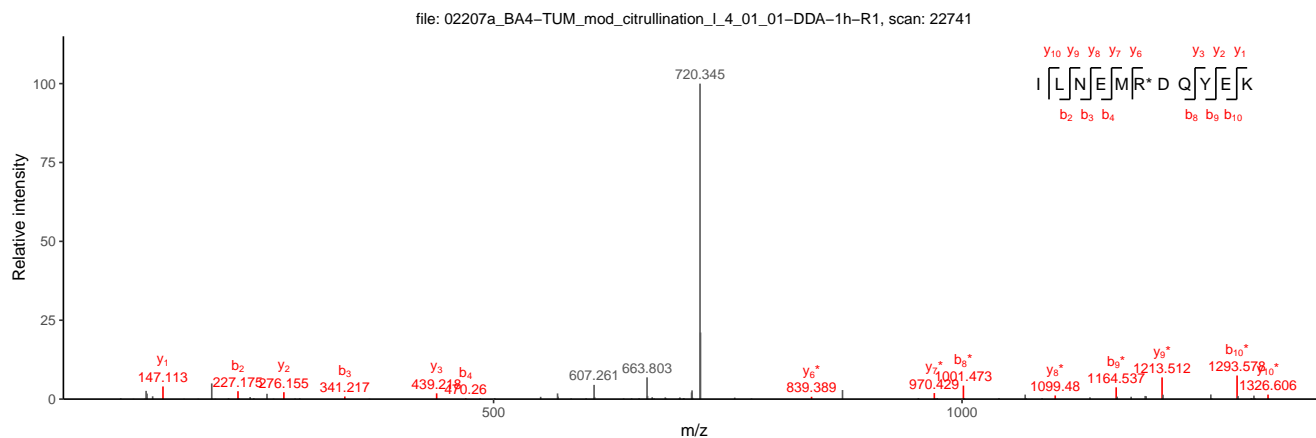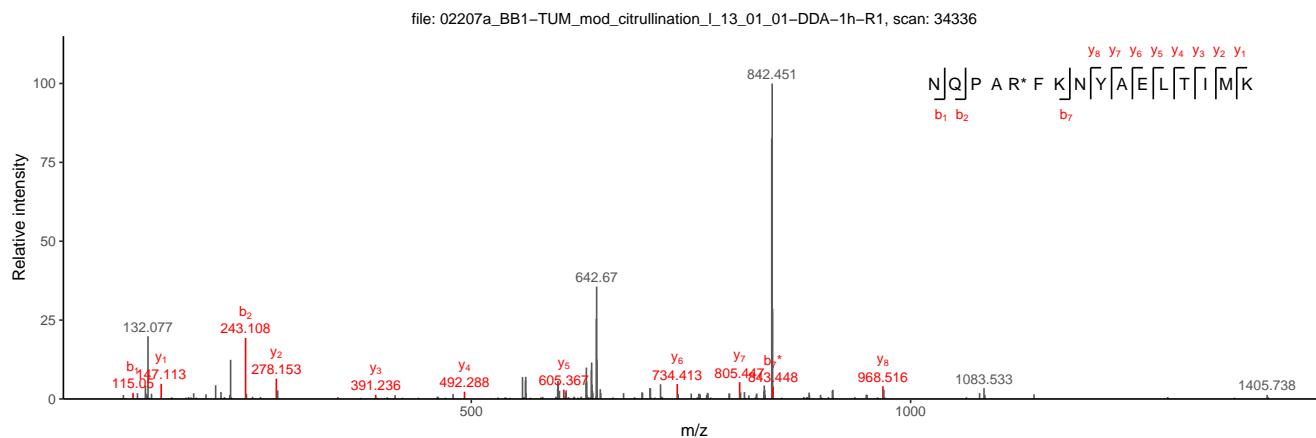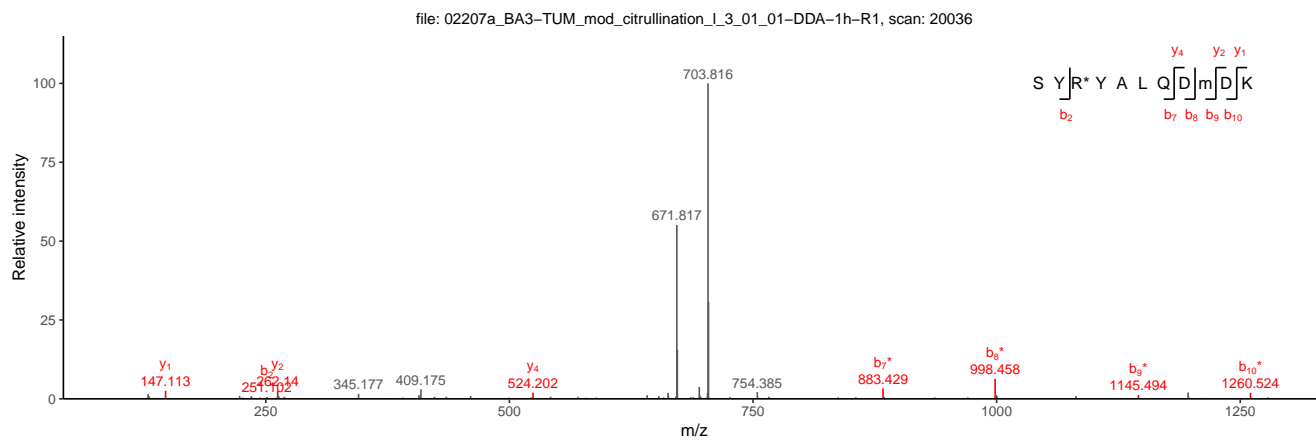

Ground truth: false, ionFinder classification: ambiguous

Ion type ■ Det ■ Amb ■ DetNL ■ ArtNL

file: 02207a\_BB7-TUM\_mod\_citrullination\_L\_19\_01\_01-DDA-1h-R1, scan: 57372

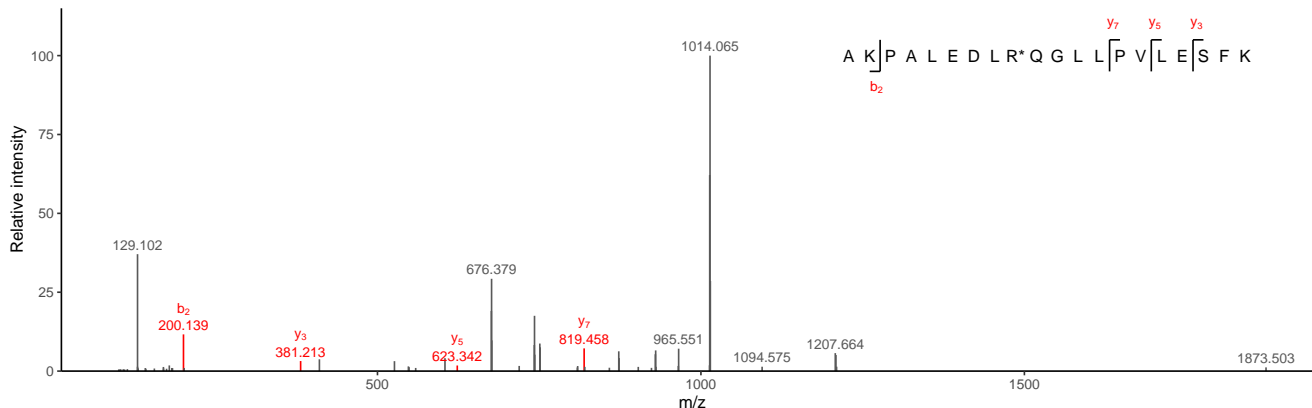

file: 02207a\_BA2-TUM\_mod\_citrullination\_L\_2\_01\_01-DDA-1h-R1, scan: 21437

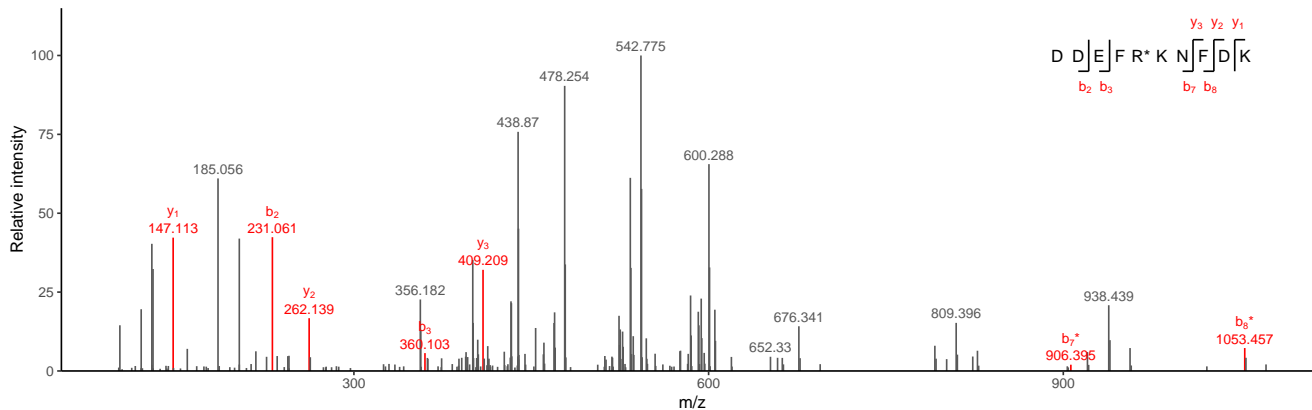

file: 02207a\_BA7-TUM\_mod\_citrullination\_L\_7\_01\_01-DDA-1h-R1, scan: 34699

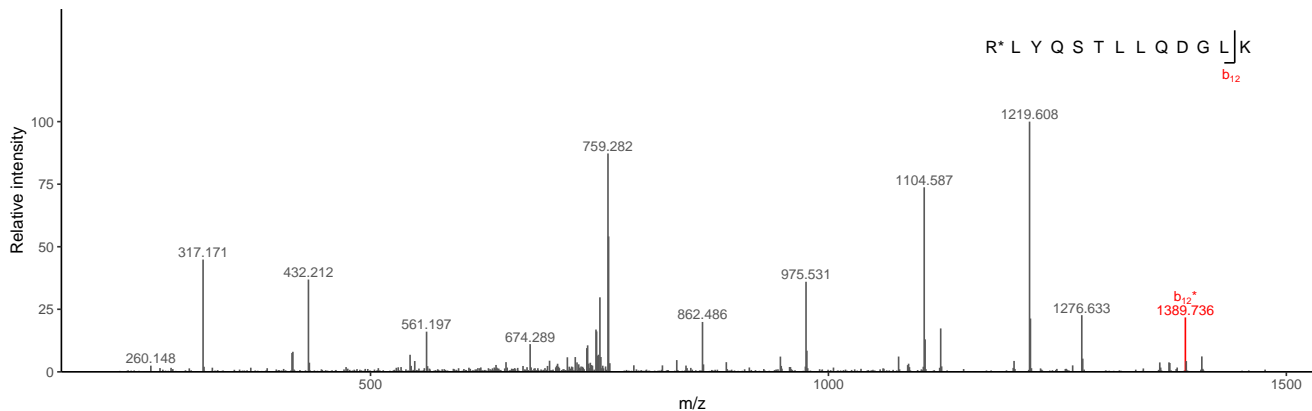

Ground truth: false, ionFinder classification: ambiguous

Ion type ■ Det ■ Amb ■ DetNL ■ ArtNL

file: 02207a\_BA2-TUM\_mod\_citrullination\_L\_2\_01\_01-DDA-1h-R1, scan: 32249

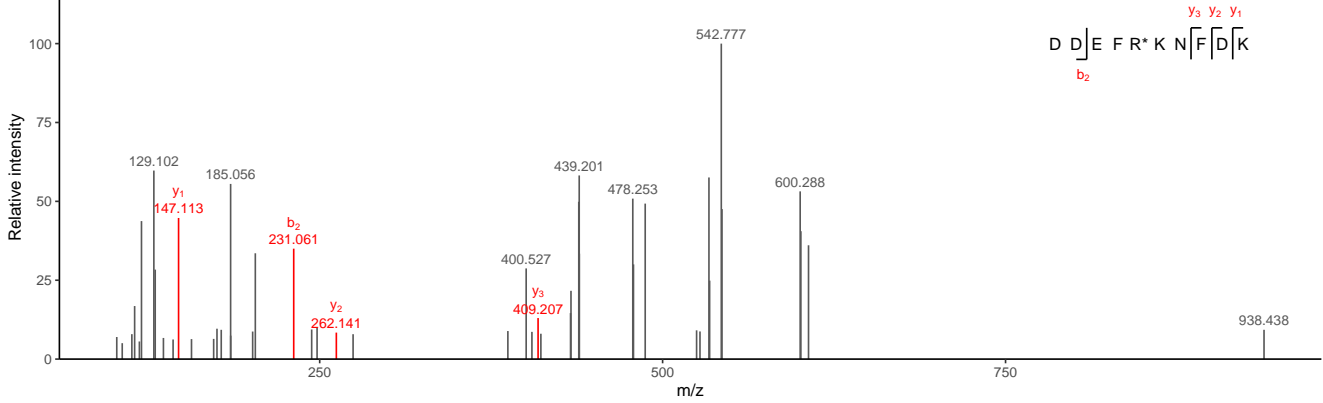

file: 02207a\_BA3-TUM\_mod\_citrullination\_L\_3\_01\_01-DDA-1h-R1, scan: 15889

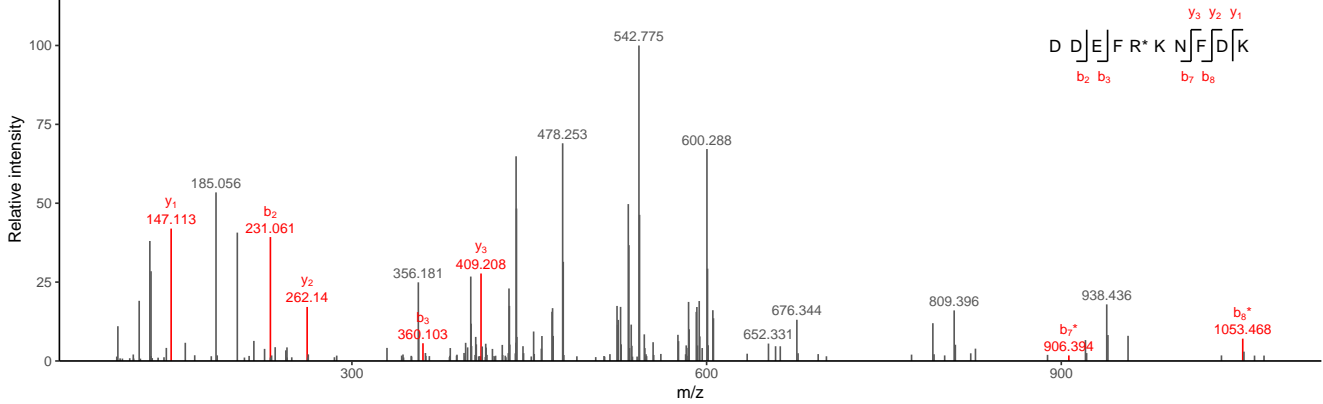

file: 02207a\_BA1-TUM\_mod\_citrullination\_L\_1\_01\_01-DDA-1h-R1, scan: 14414

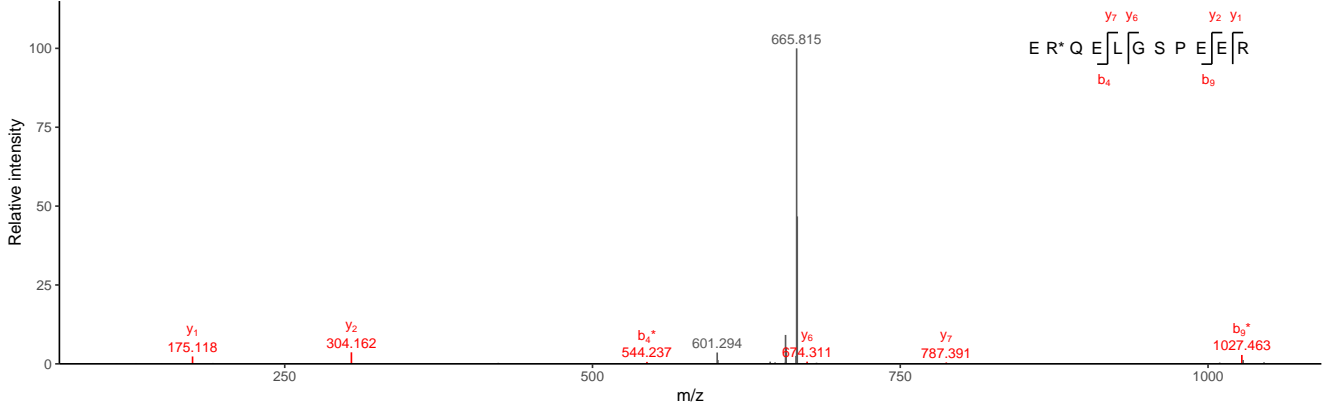

Ground truth: false, ionFinder classification: ambiguous

Ion type ■ Det ■ Amb ■ DetNL ■ ArtNL

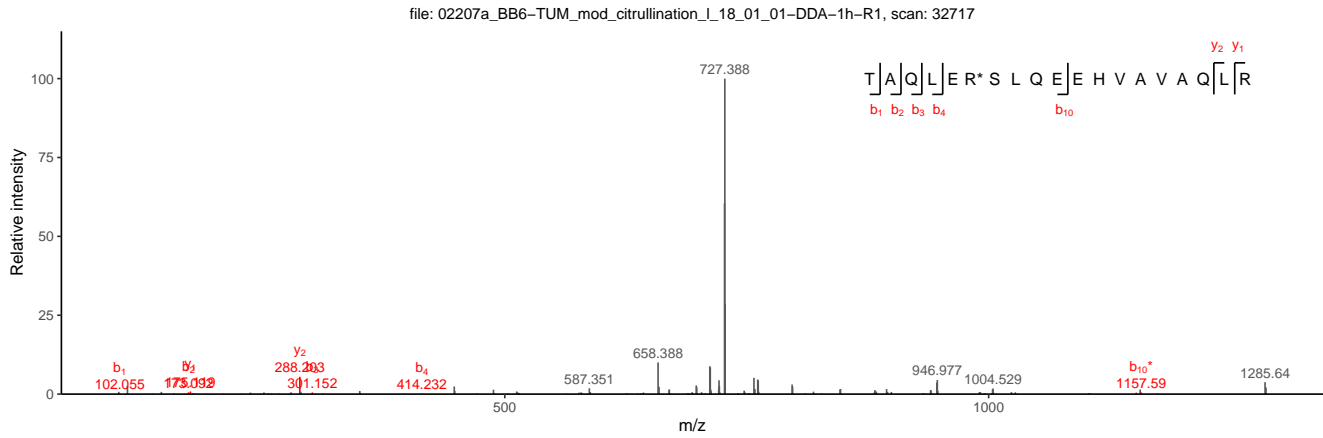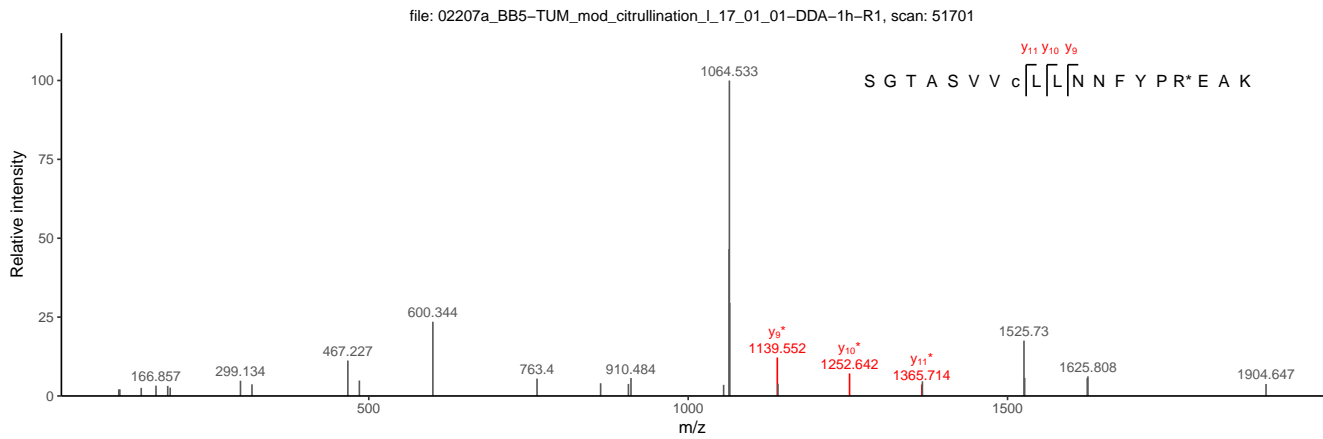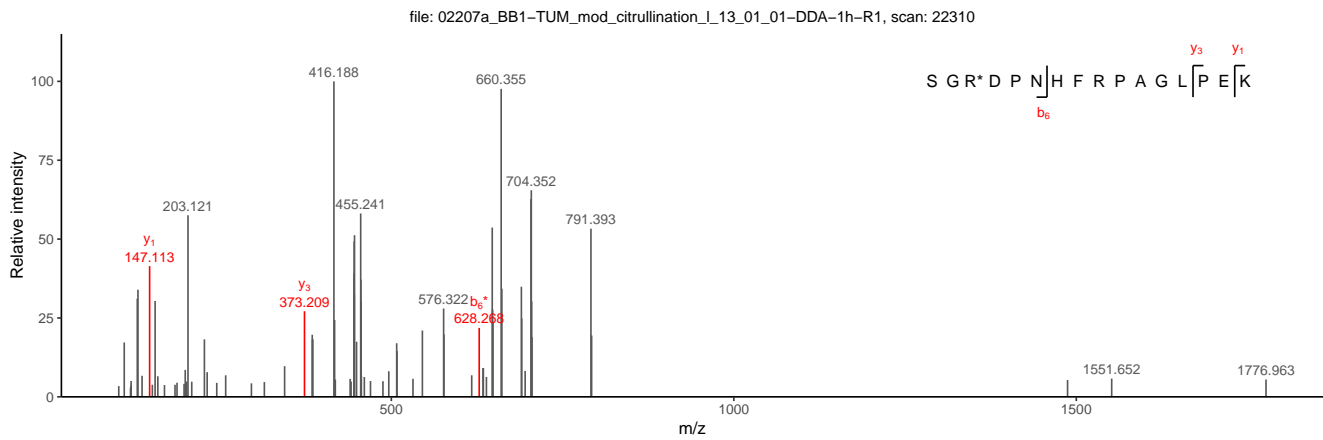

Ground truth: false, ionFinder classification: ambiguous

Ion type ■ Det ■ Amb ■ DetNL ■ ArtNL

file: 02207a\_BB5-TUM\_mod\_citrullination\_I\_17\_01\_01-DDA-1h-R1, scan: 33276

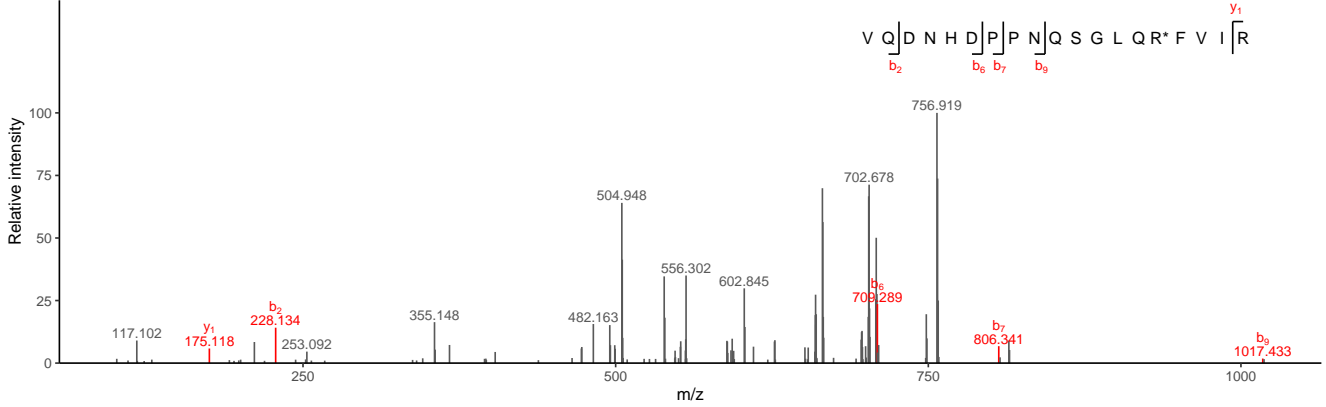

file: 02207a\_BB6-TUM\_mod\_citrullination\_I\_18\_01\_01-DDA-1h-R1, scan: 56941

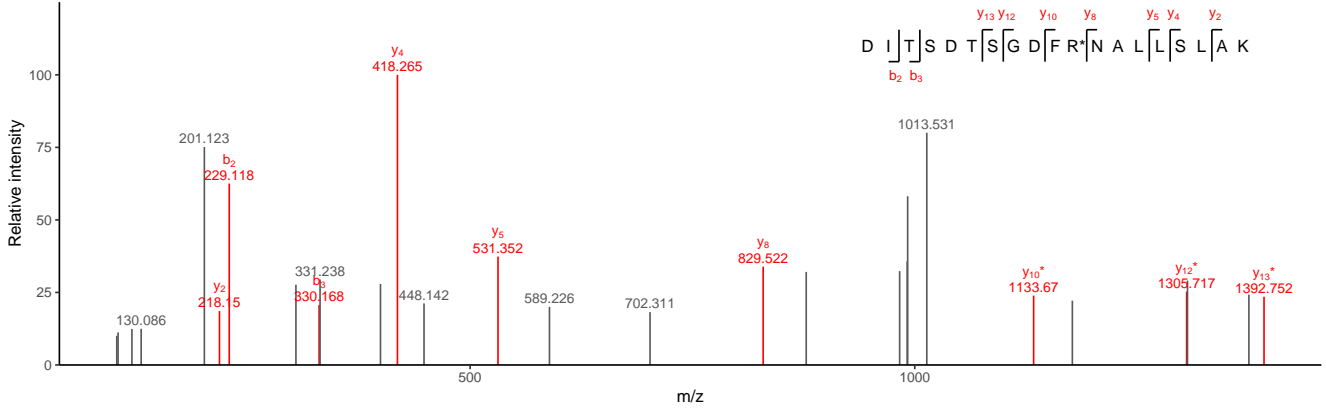

file: 02207a\_BB7-TUM\_mod\_citrullination\_I\_19\_01\_01-DDA-1h-R1, scan: 26556

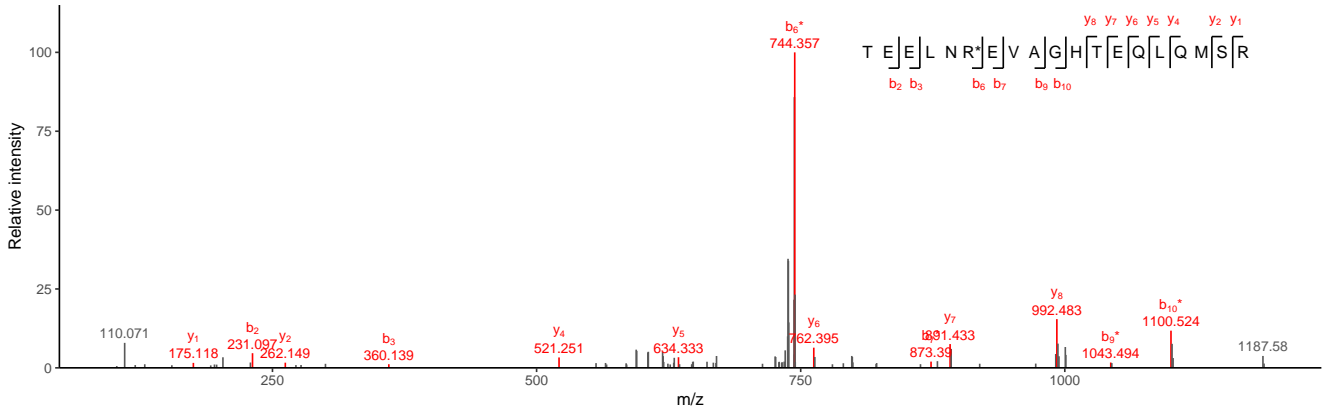

Ground truth: false, ionFinder classification: ambiguous

Ion type ■ Det ■ Amb ■ DetNL ■ ArtNL

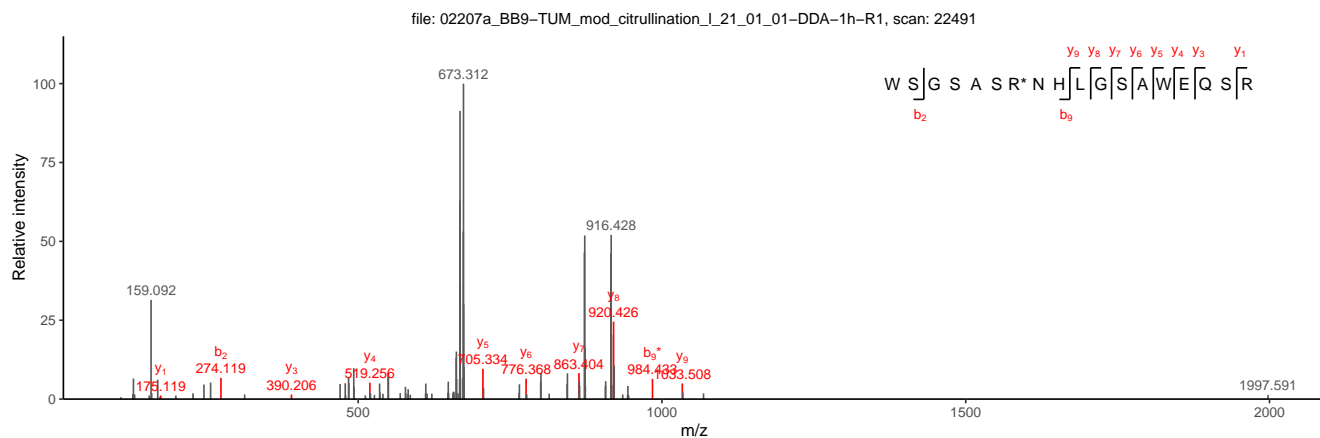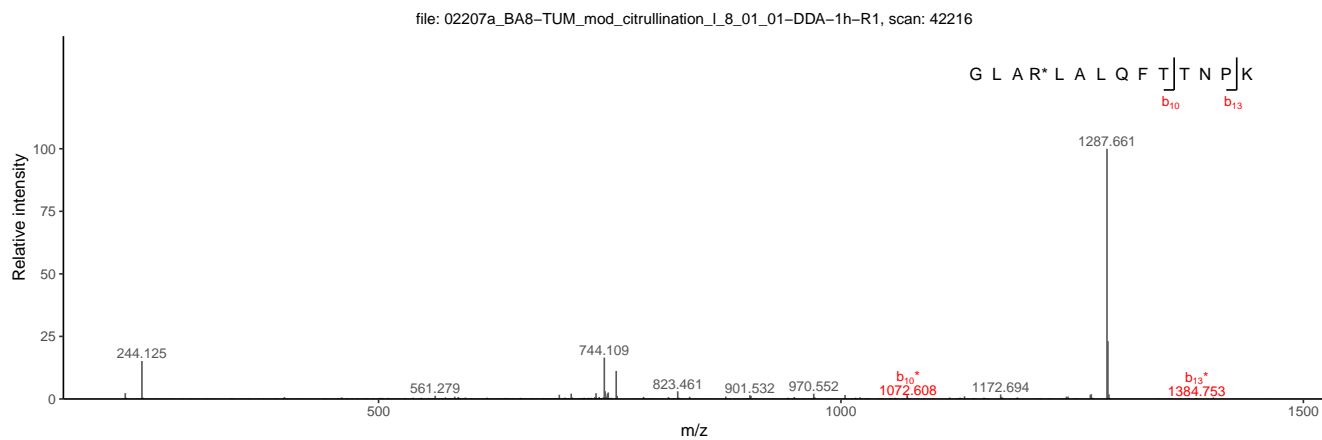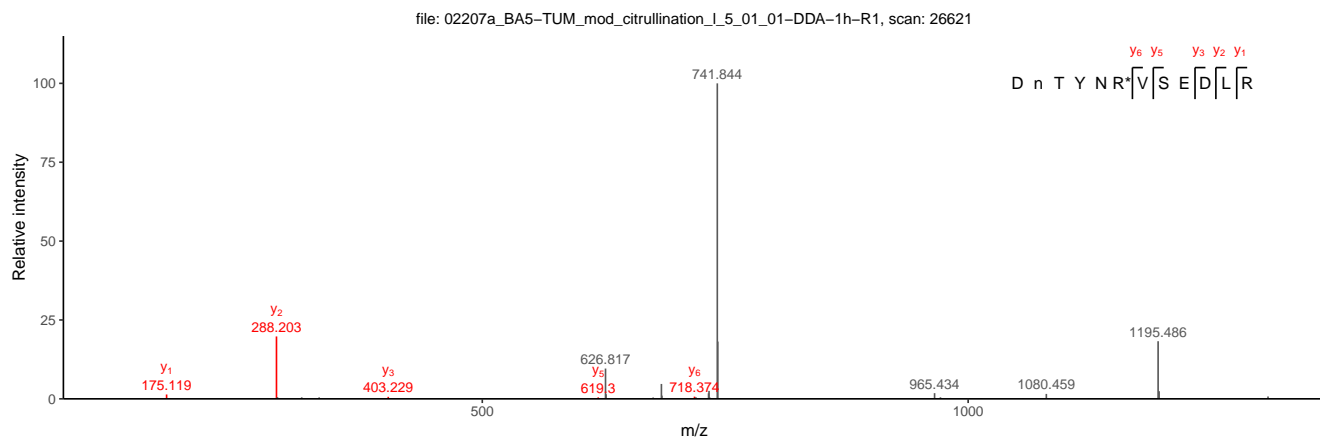



Ground truth: false, ionFinder classification: ambiguous

Ion type ■ Det ■ Amb ■ DetNL ■ ArtNL

file: 02207a\_BA11-TUM\_mod\_citrullination\_L11\_01\_01-DDA-1h-R1, scan: 42591

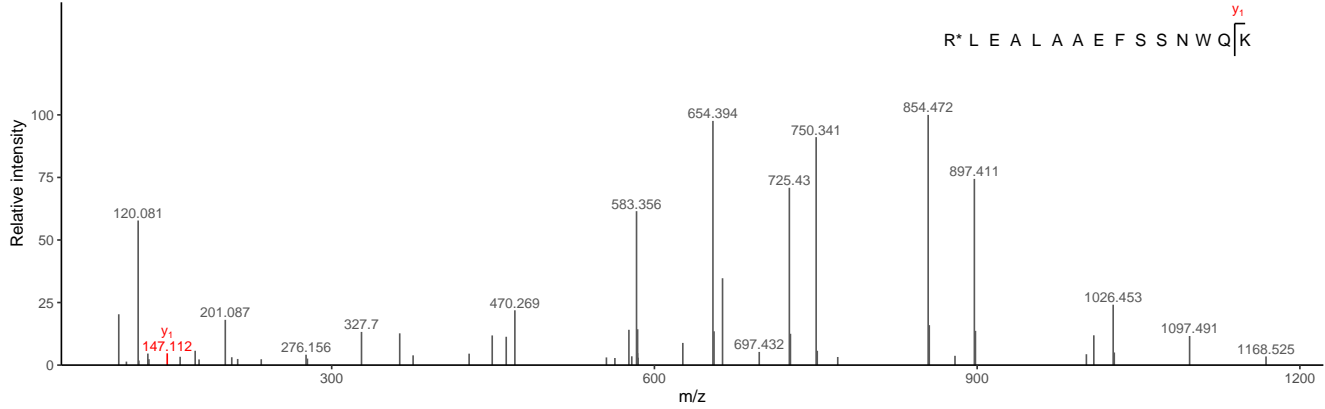

file: 02207a\_BB4-TUM\_mod\_citrullination\_L16\_01\_01-DDA-1h-R1, scan: 4973

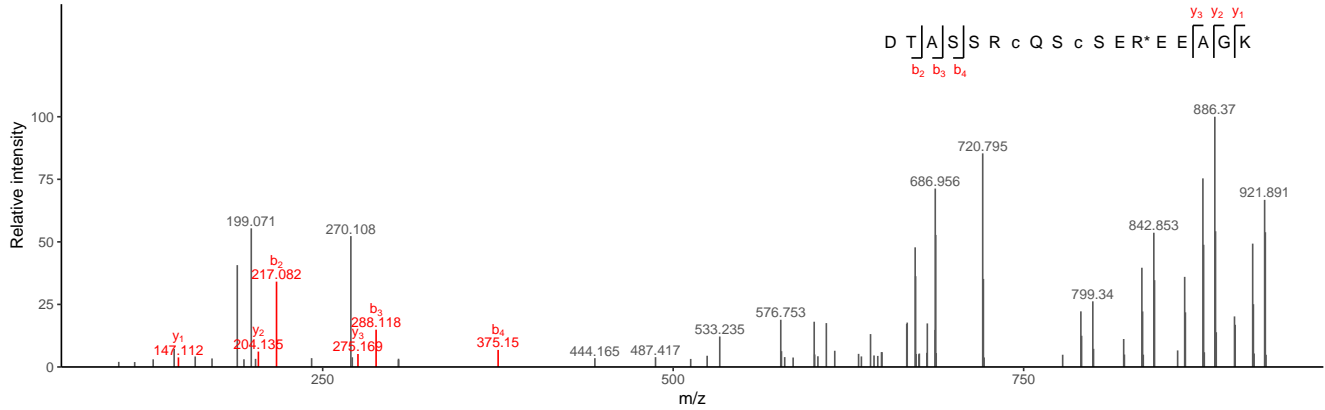

file: 02207a\_BA11-TUM\_mod\_citrullination\_L11\_01\_01-DDA-1h-R1, scan: 31936

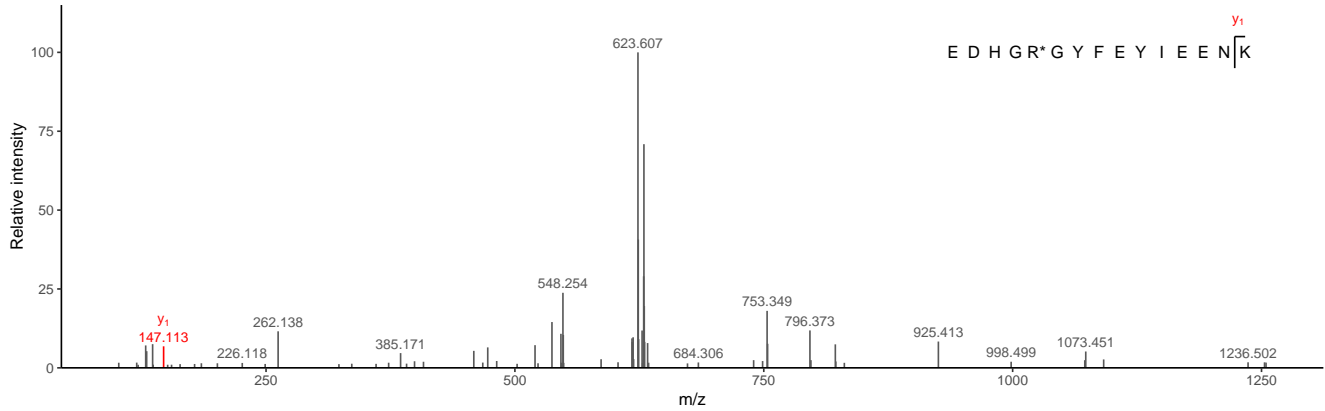

Ground truth: false, ionFinder classification: ambiguous

Ion type ■ Det ■ Amb ■ DetNL ■ ArtNL

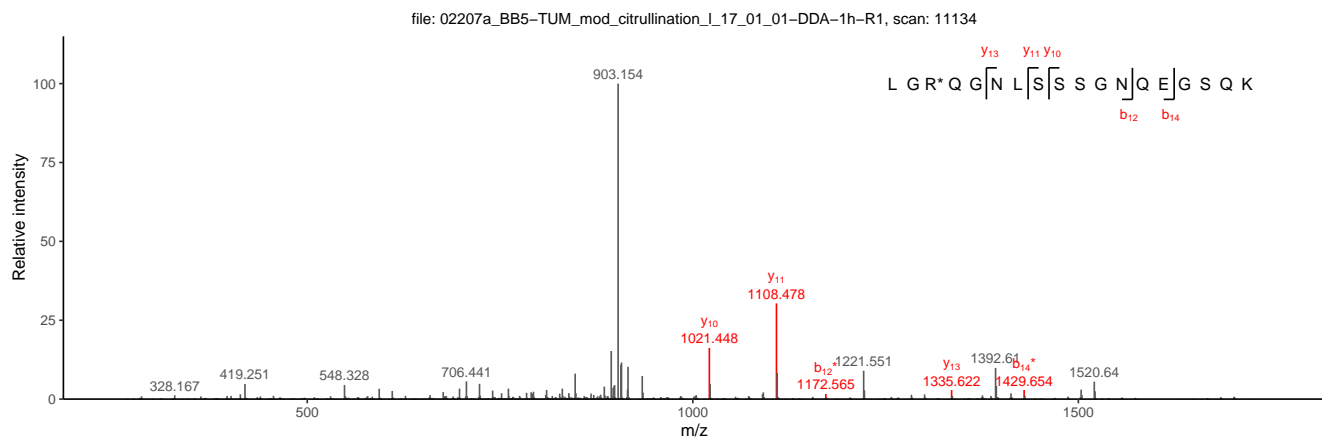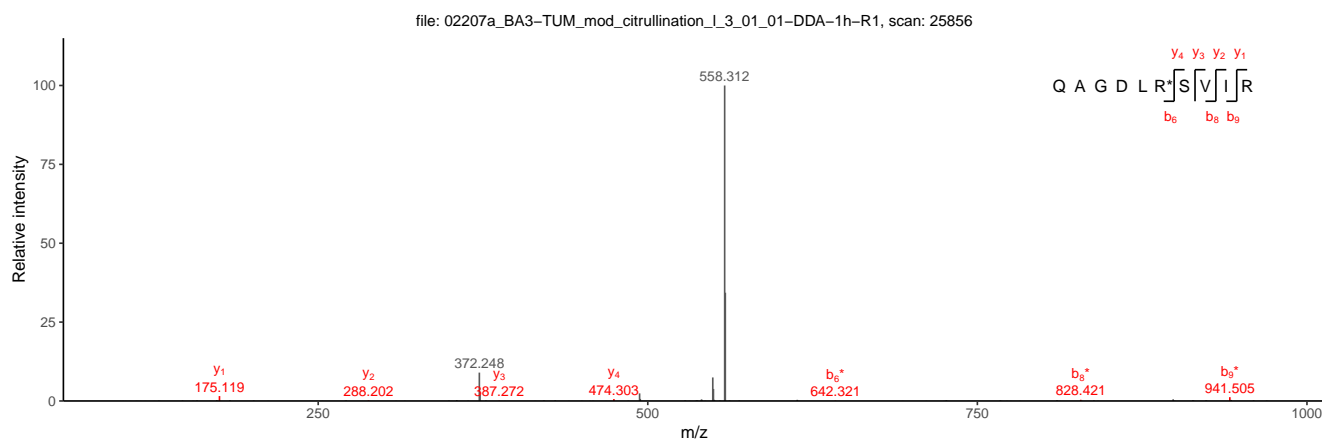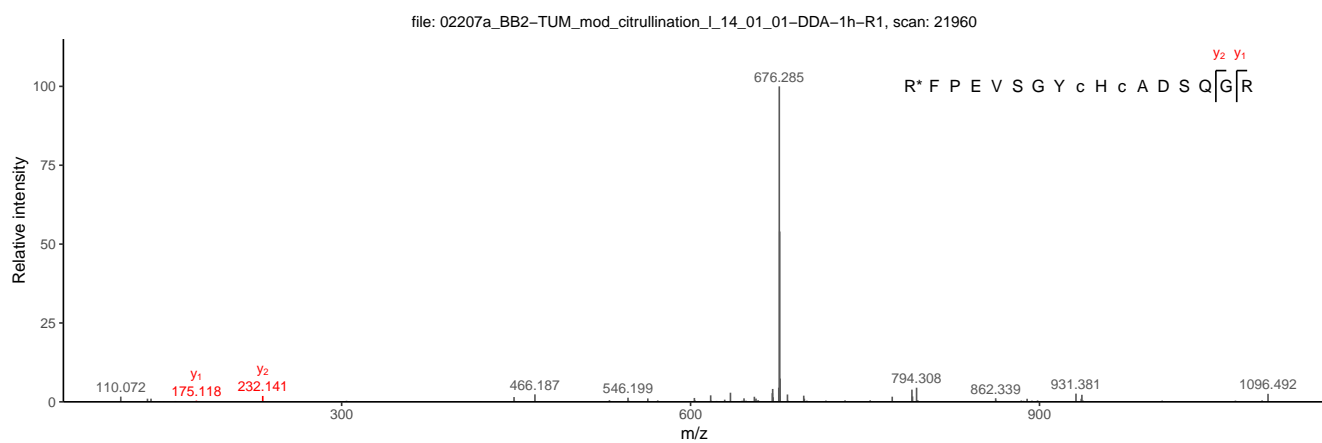

Ground truth: false, ionFinder classification: ambiguous

Ion type ■ Det ■ Amb ■ DetNL ■ ArtNL

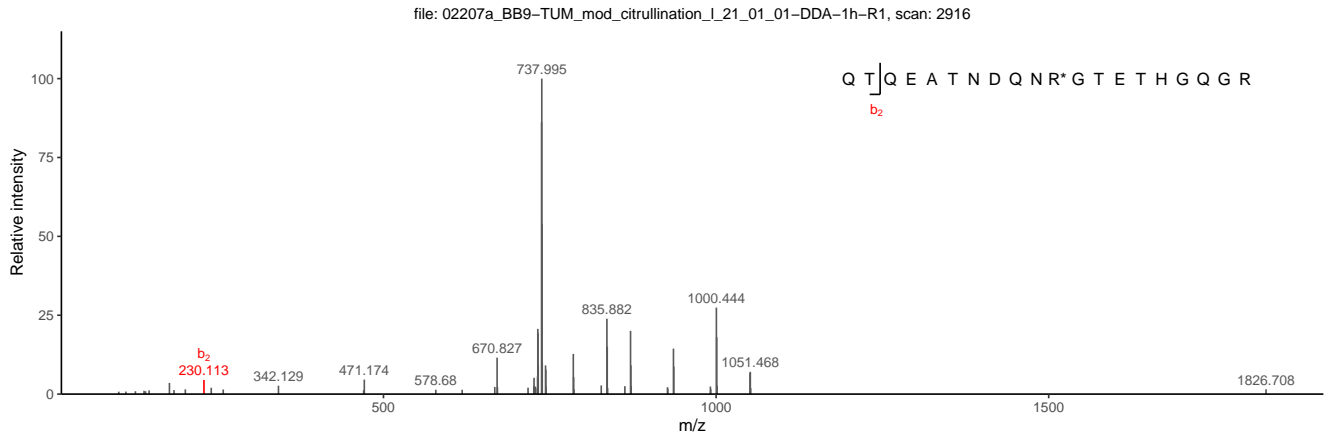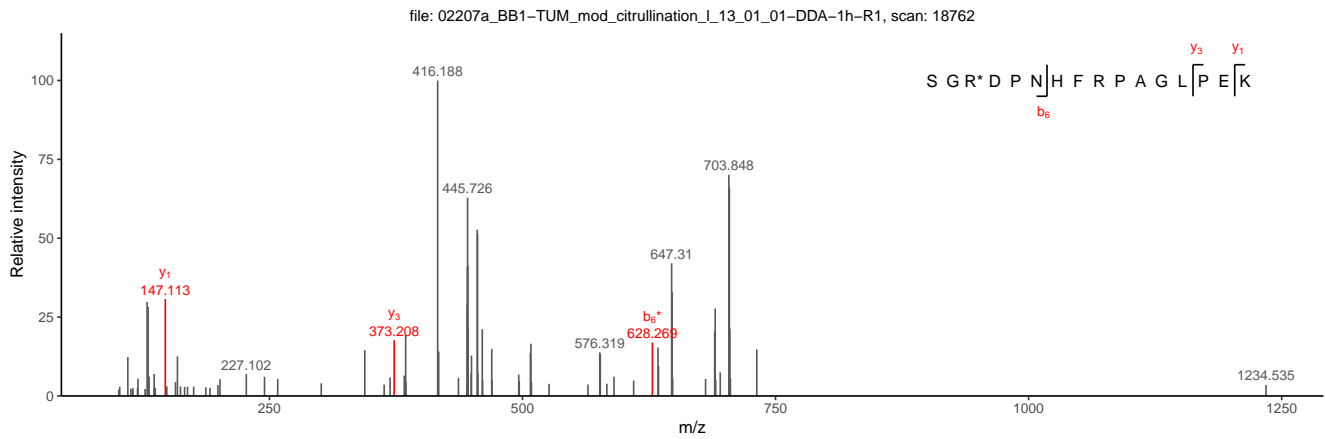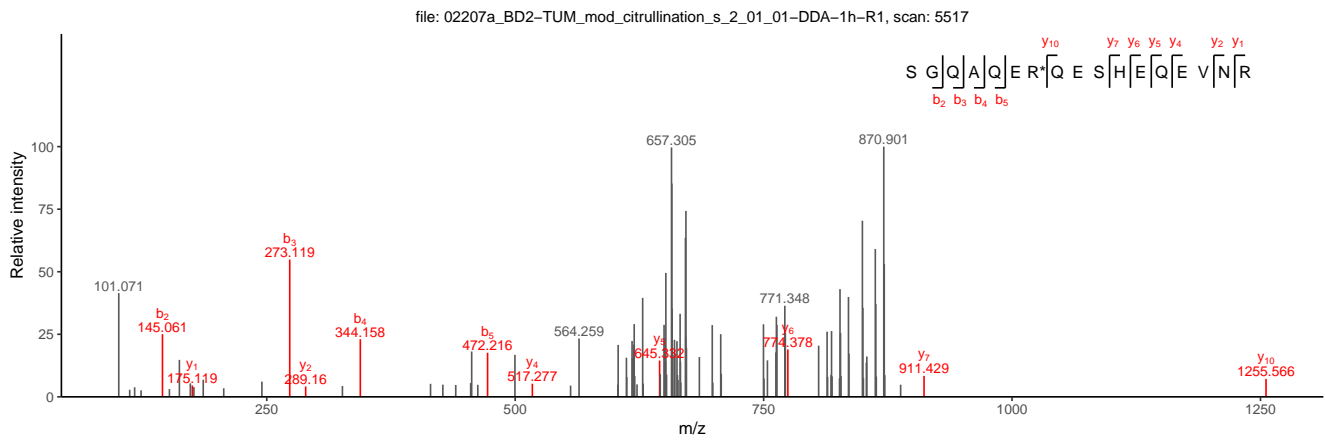

Ground truth: false, ionFinder classification: ambiguous

Ion type ■ Det ■ Amb ■ DetNL ■ ArtNL

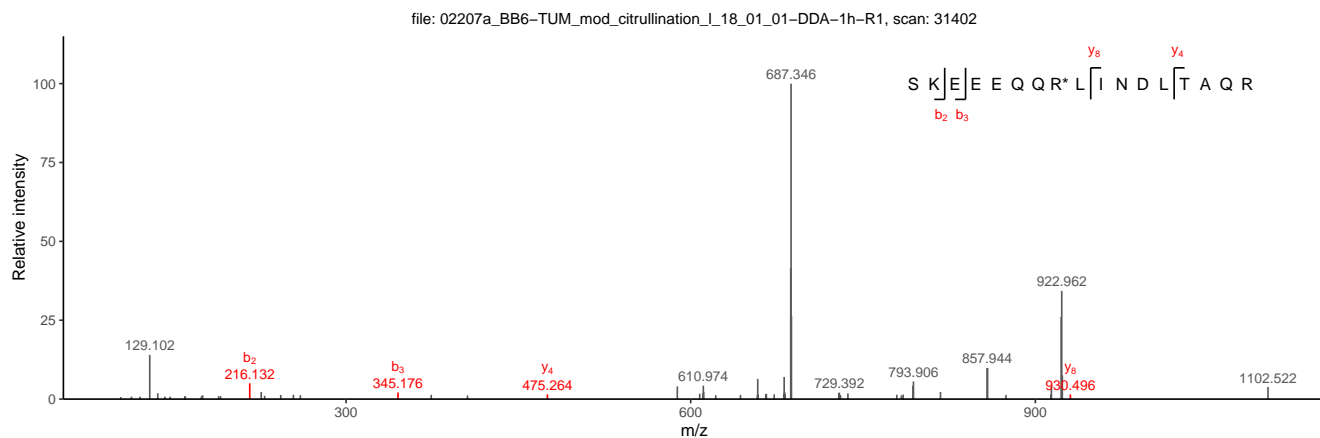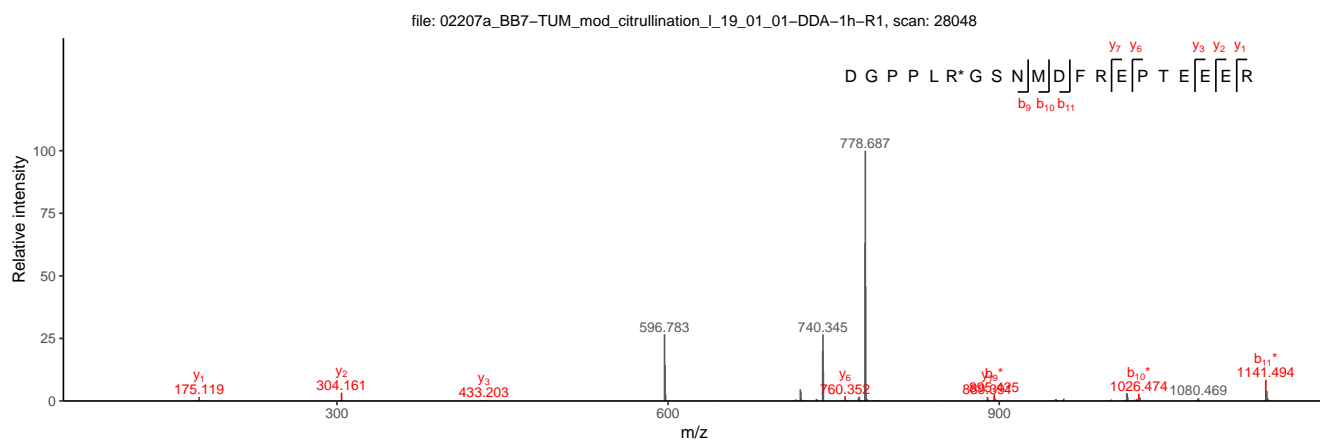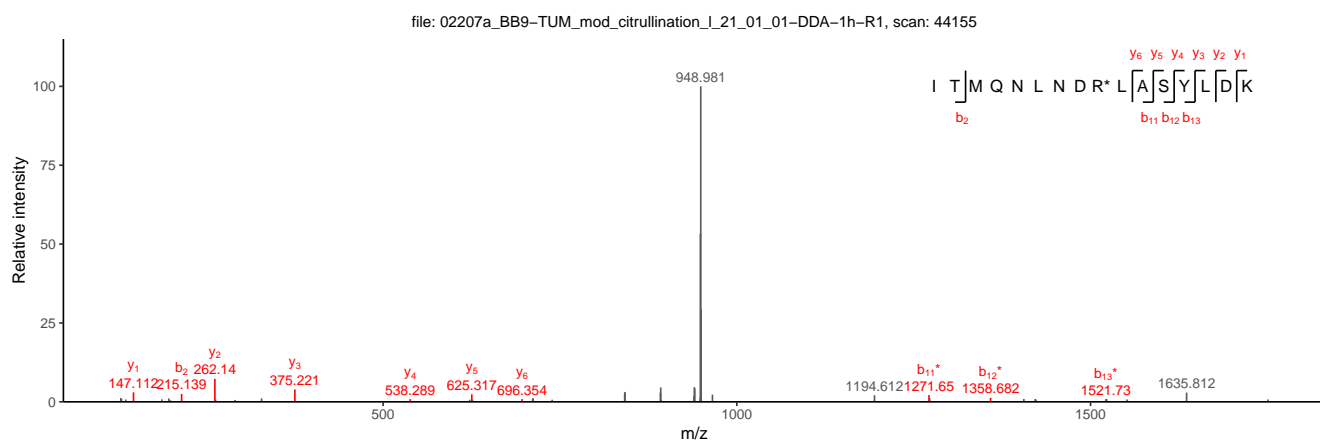

Ground truth: false, ionFinder classification: ambiguous

Ion type ■ Det ■ Amb ■ DetNL ■ ArtNL

file: 02207a\_BA2-TUM\_mod\_citrullination\_L\_2\_01\_01-DDA-1h-R1, scan: 41481

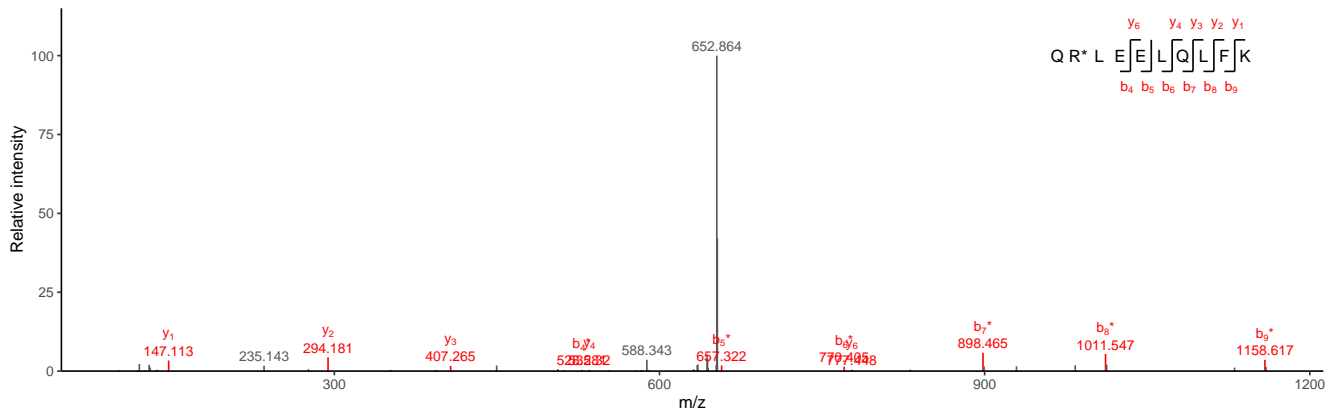

file: 02207a\_BA6-TUM\_mod\_citrullination\_L\_6\_01\_01-DDA-1h-R1, scan: 14390

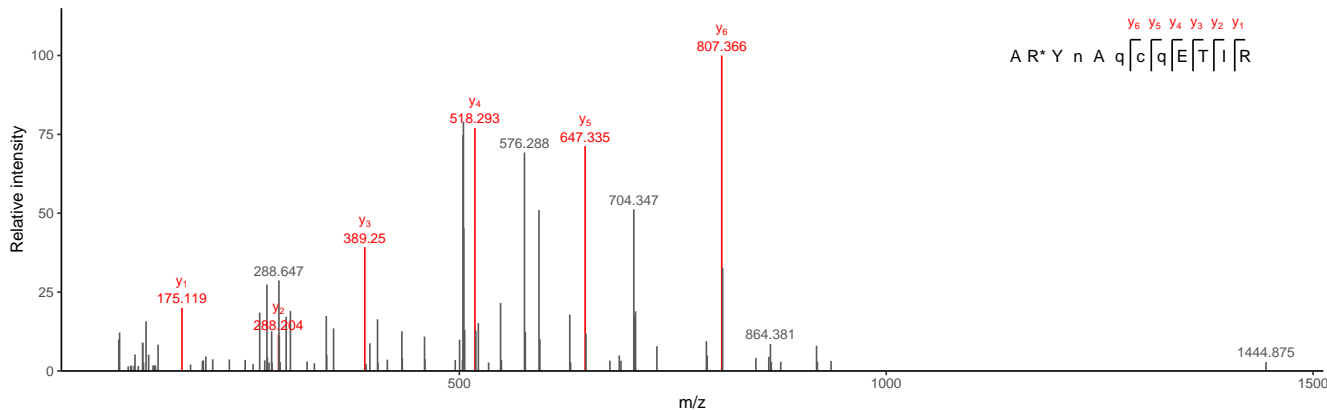

file: 02207a\_BA1-TUM\_mod\_citrullination\_L\_1\_01\_01-DDA-1h-R1, scan: 21089

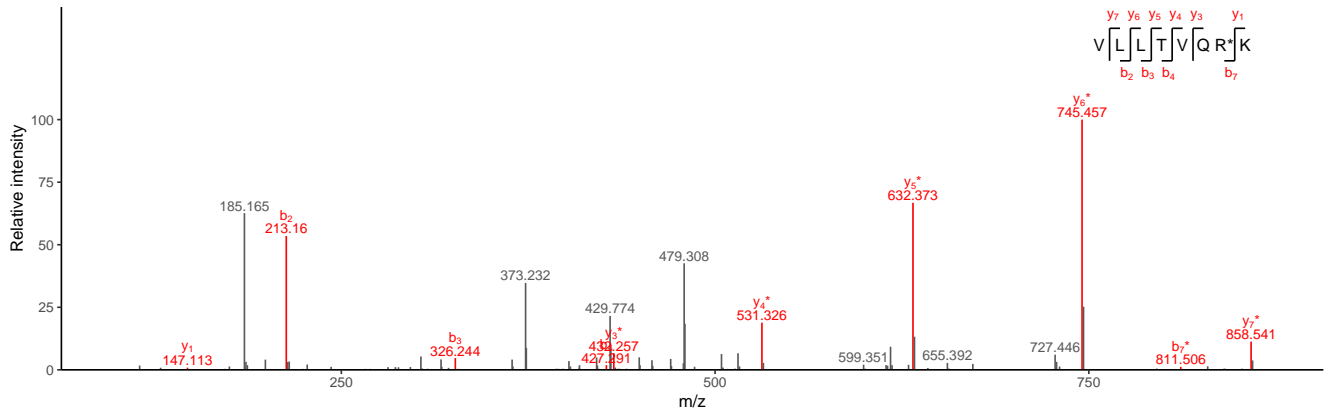

Ground truth: false, ionFinder classification: ambiguous

Ion type ■ Det ■ Amb ■ DetNL ■ ArtNL

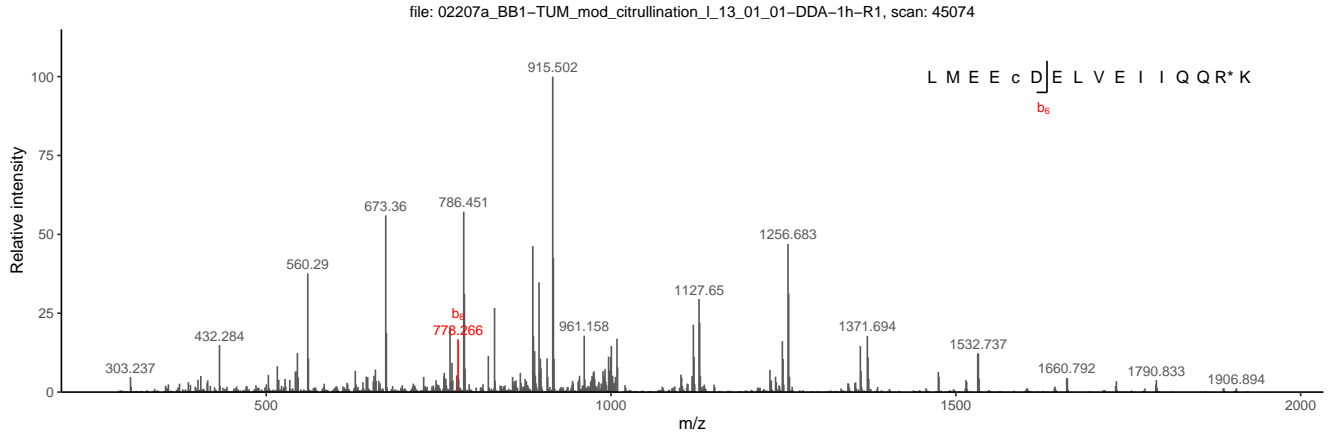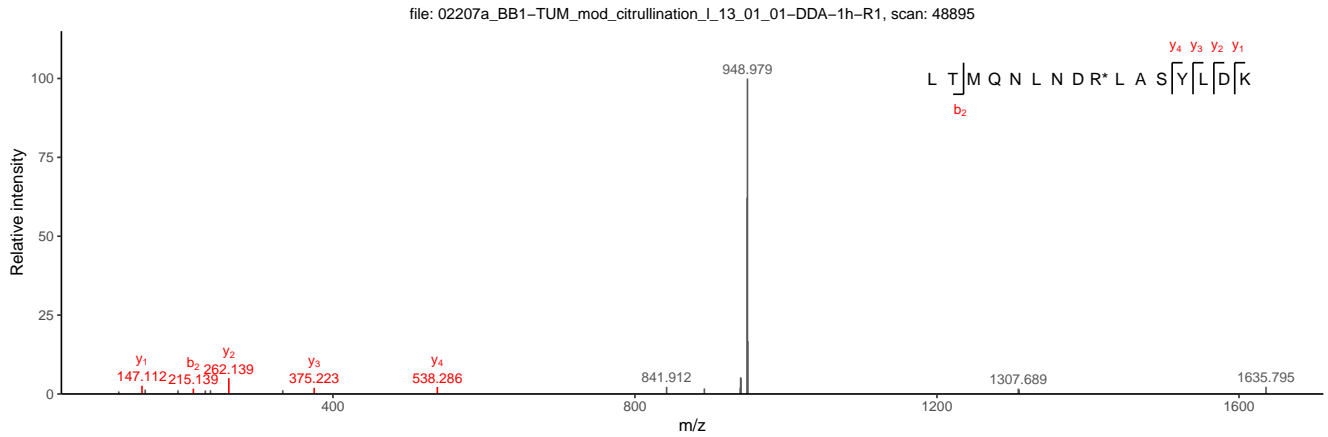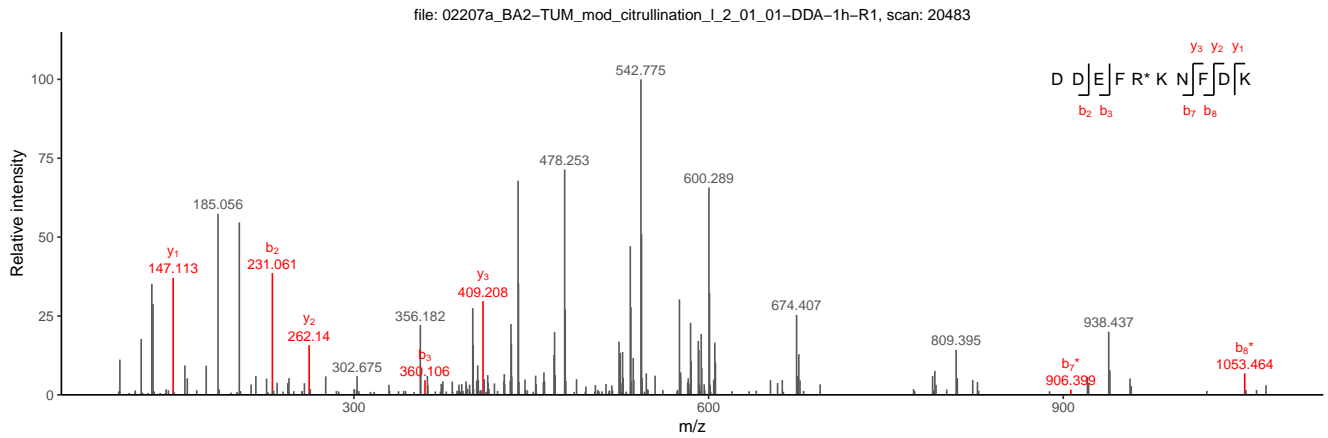

Ground truth: false, ionFinder classification: ambiguous

Ion type ■ Det ■ Amb ■ DetNL ■ ArtNL

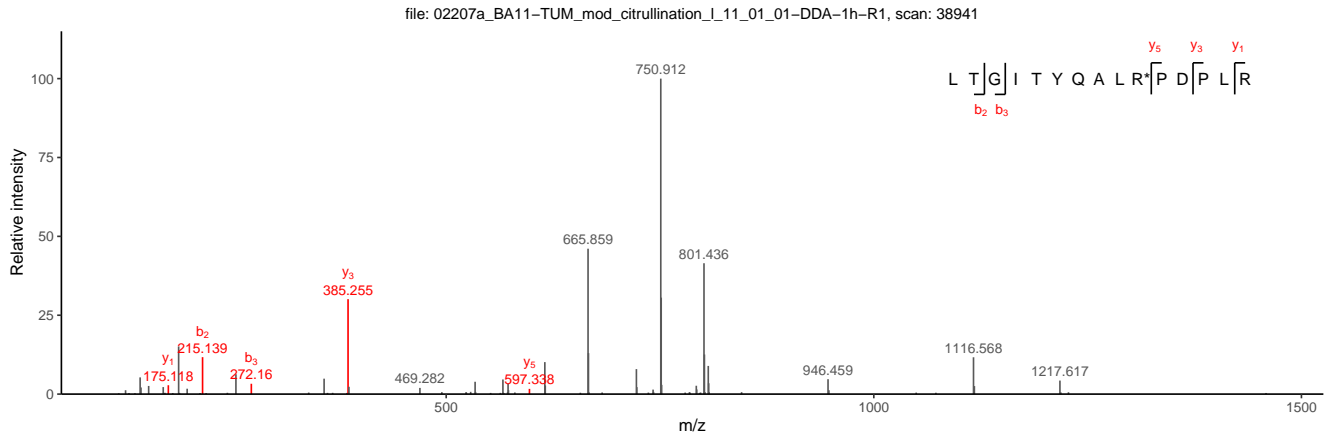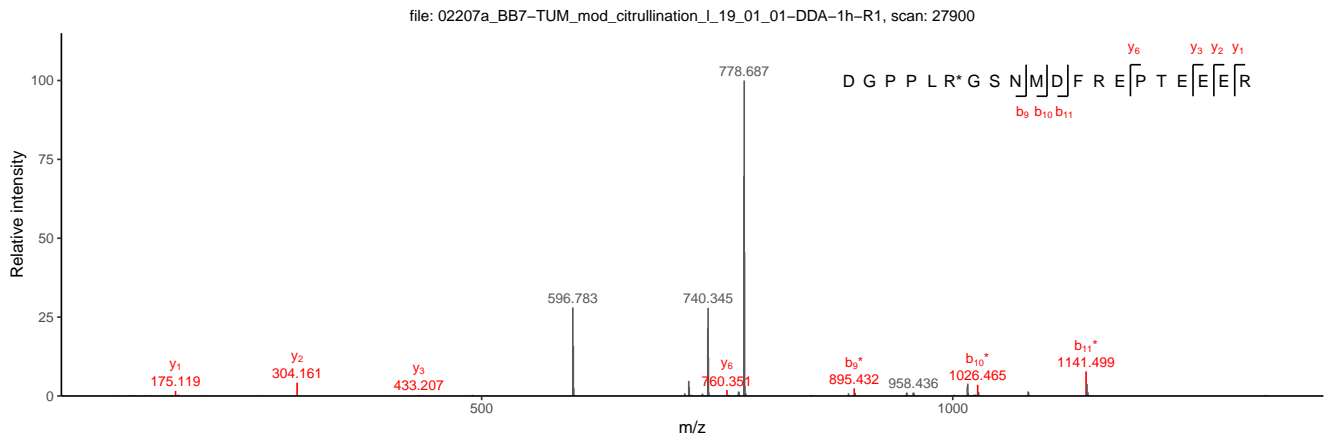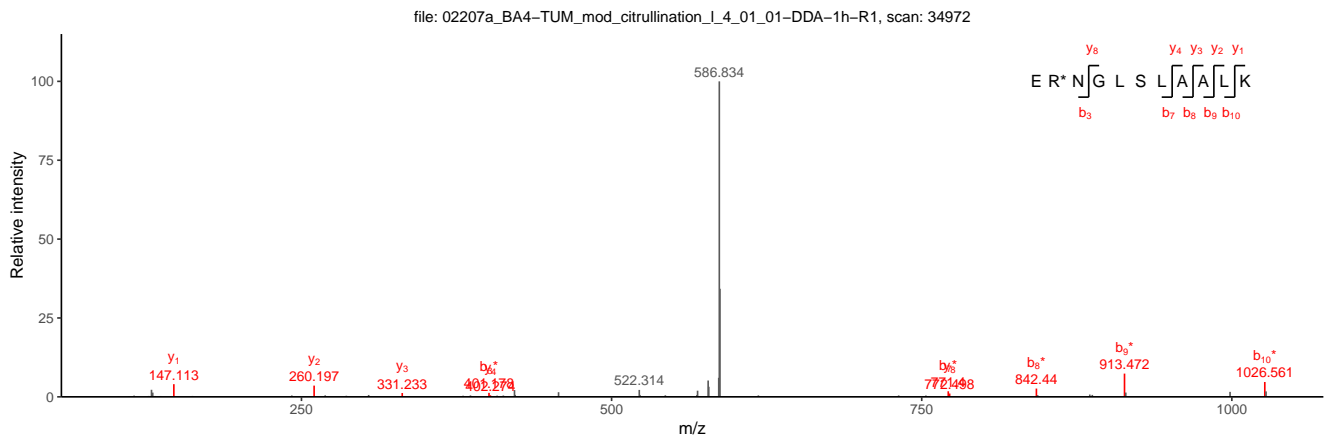

Ground truth: false, ionFinder classification: ambiguous

Ion type ■ Det ■ Amb ■ DetNL ■ ArtNL

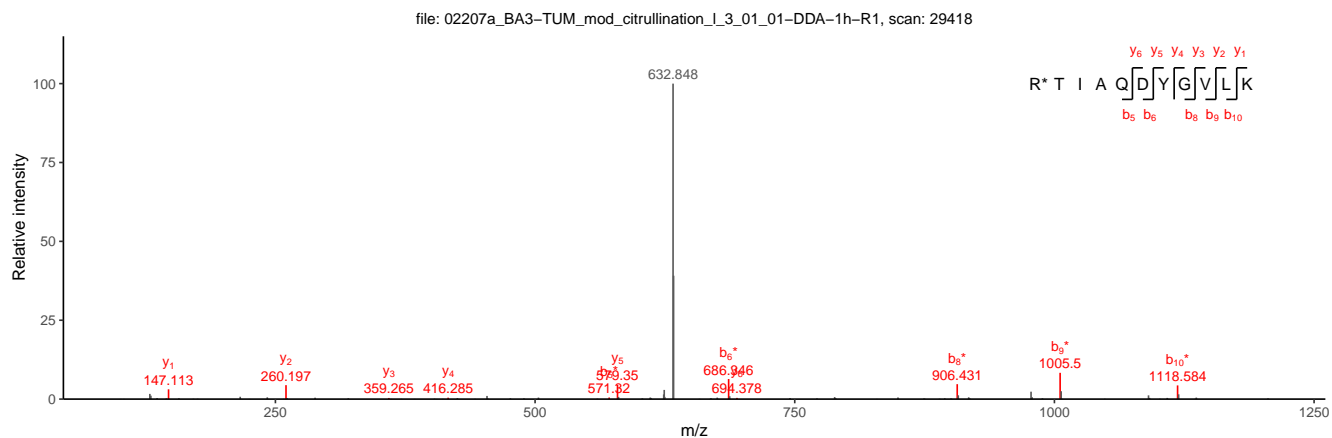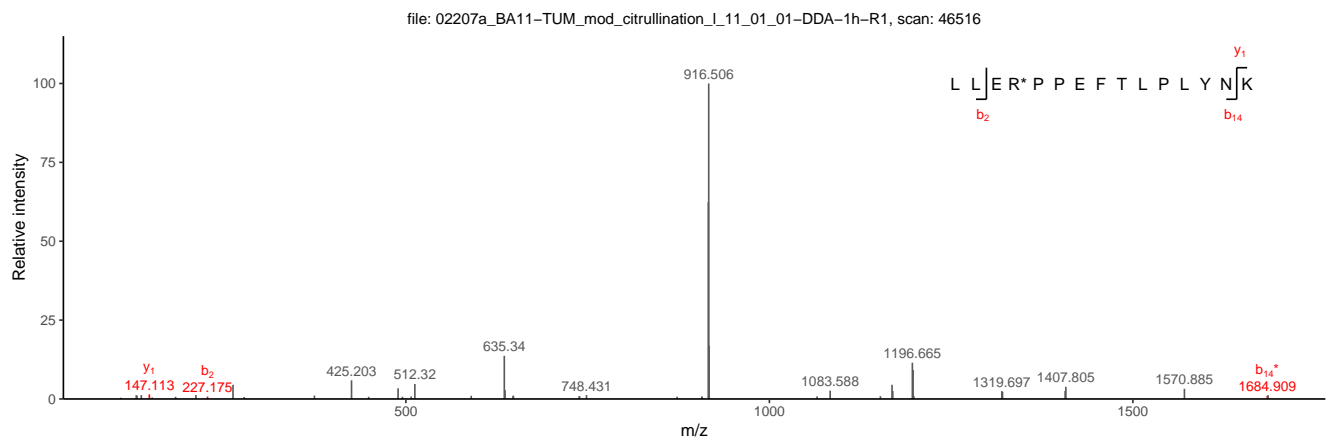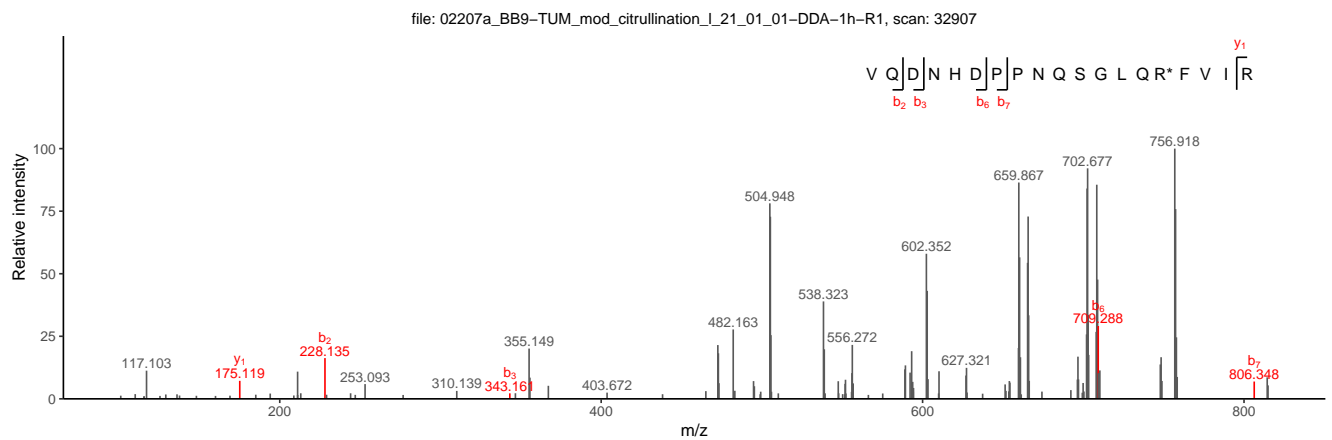



Ground truth: false, ionFinder classification: ambiguous

Ion type ■ Det ■ Amb ■ DetNL ■ ArtNL

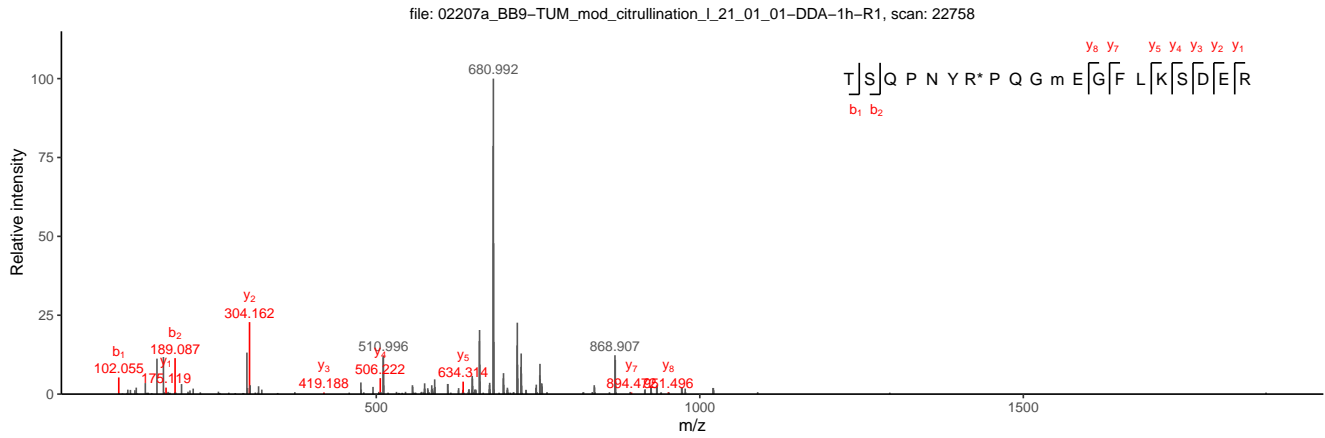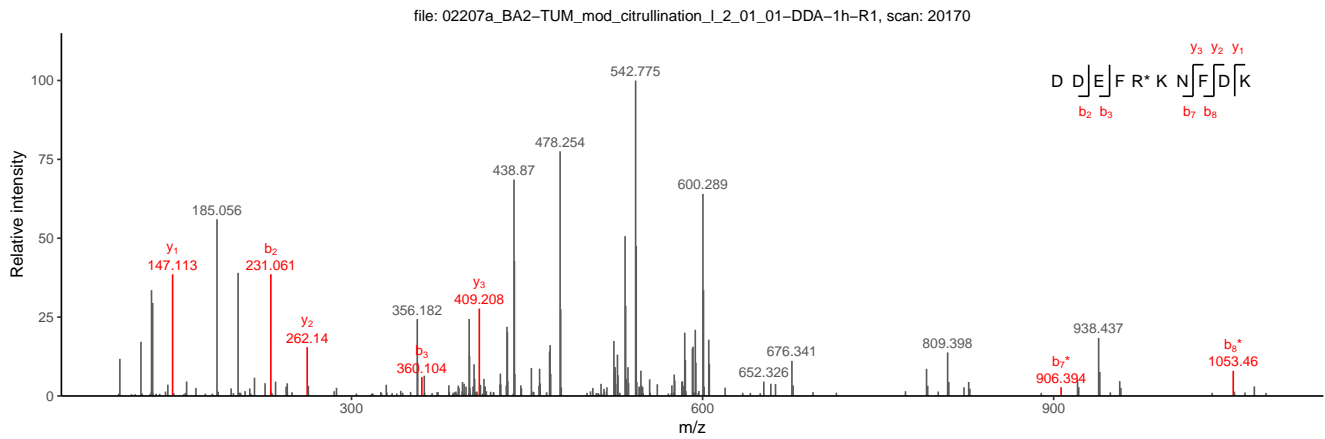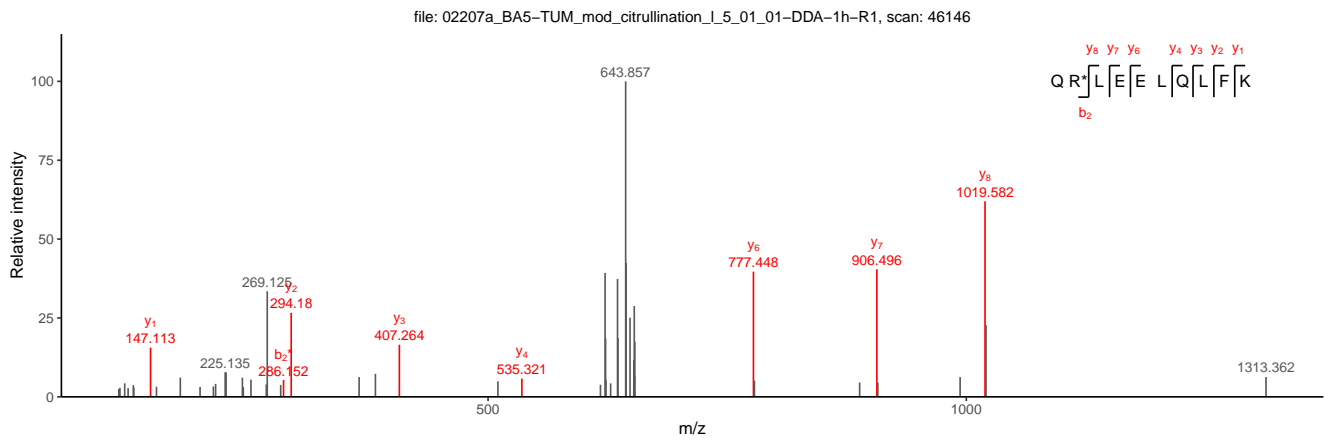

Ground truth: false, ionFinder classification: ambiguous

Ion type ■ Det ■ Amb ■ DetNL ■ ArtNL

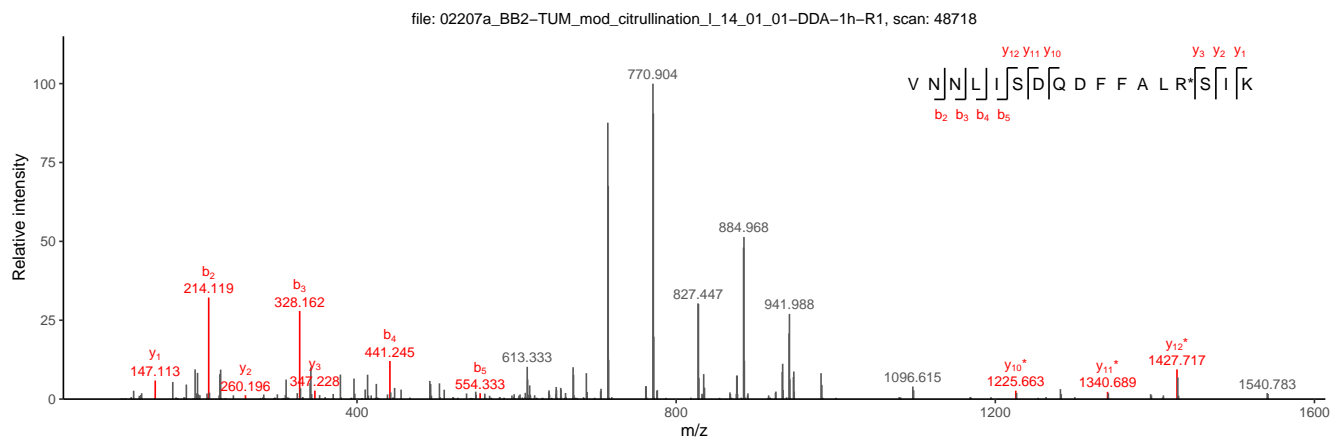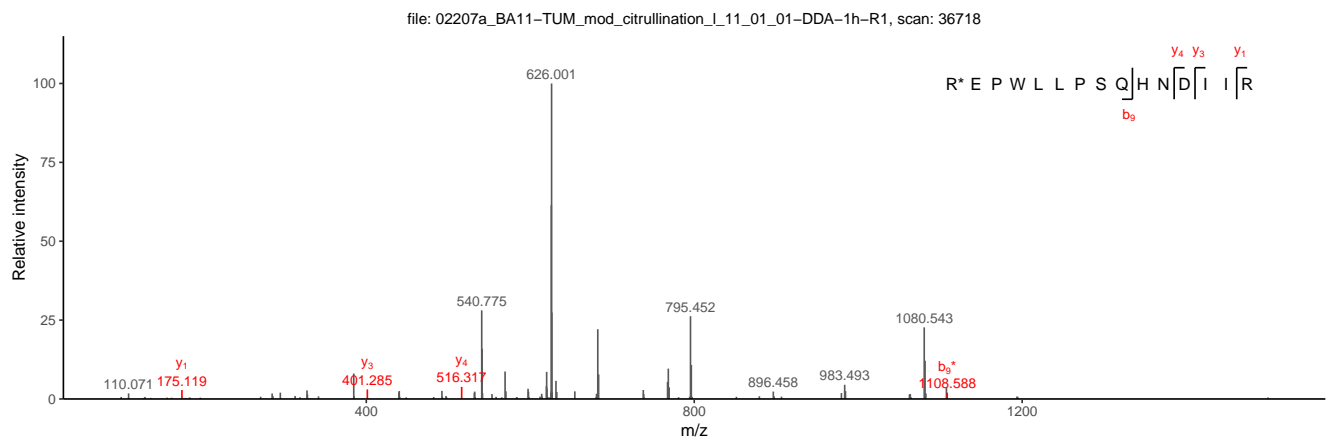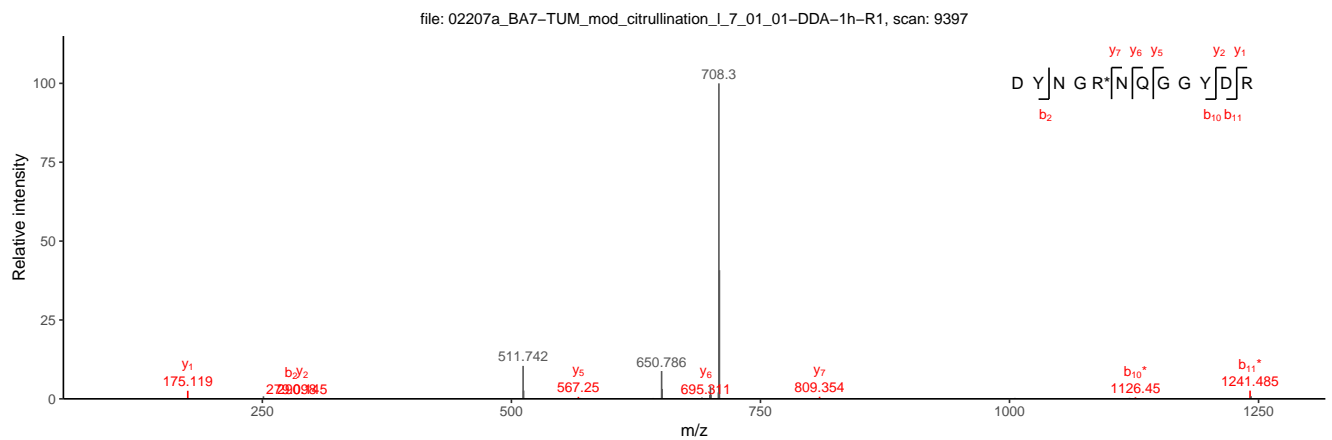

Ground truth: false, ionFinder classification: ambiguous

Ion type ■ Det ■ Amb ■ DetNL ■ ArtNL

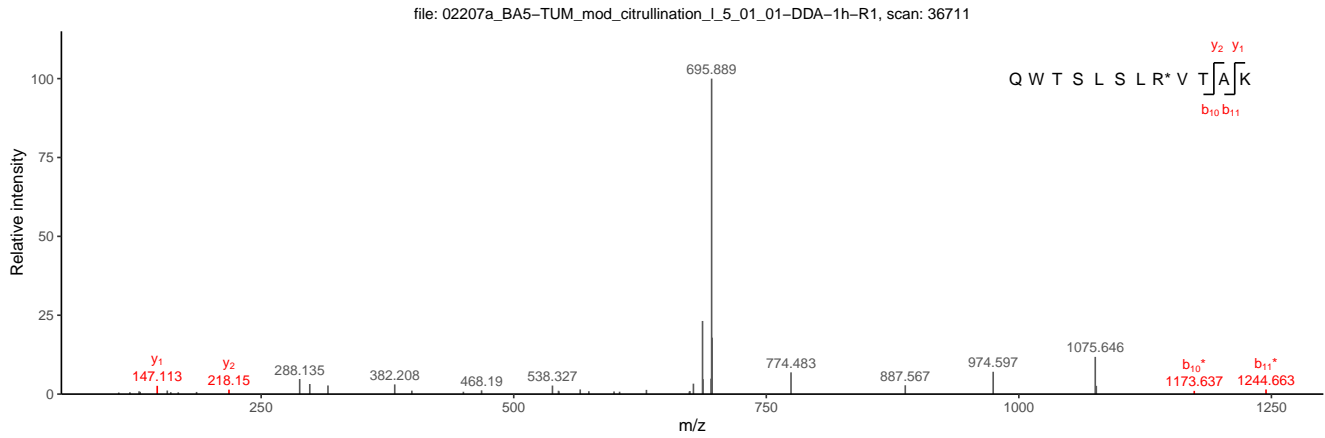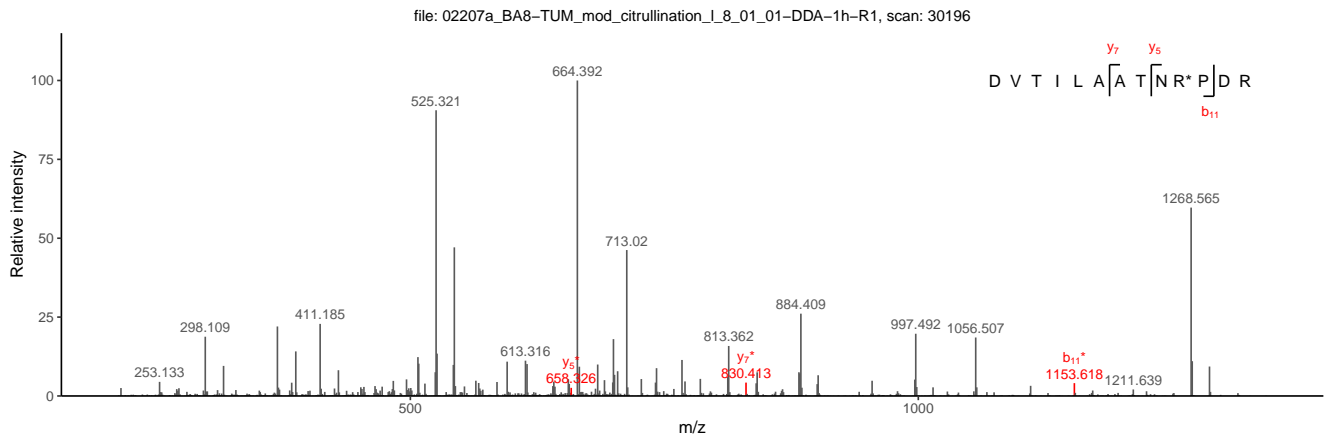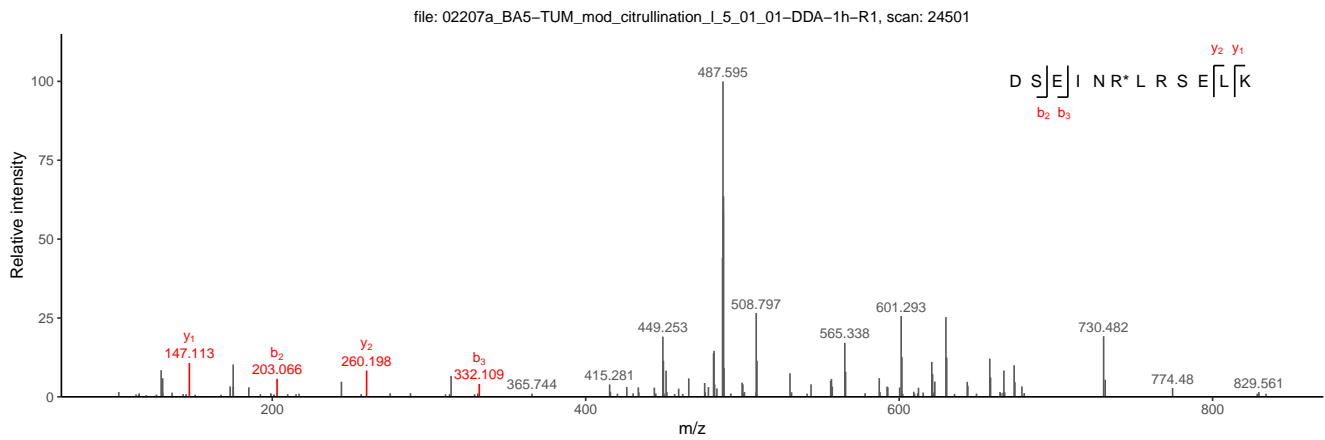

Ground truth: false, ionFinder classification: ambiguous

Ion type ■ Det ■ Amb ■ DetNL ■ ArtNL

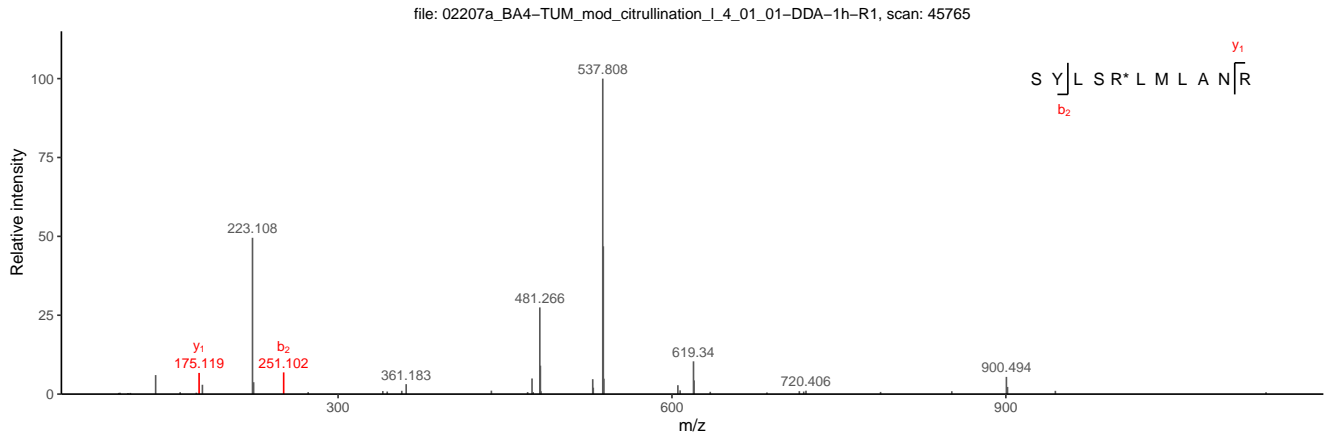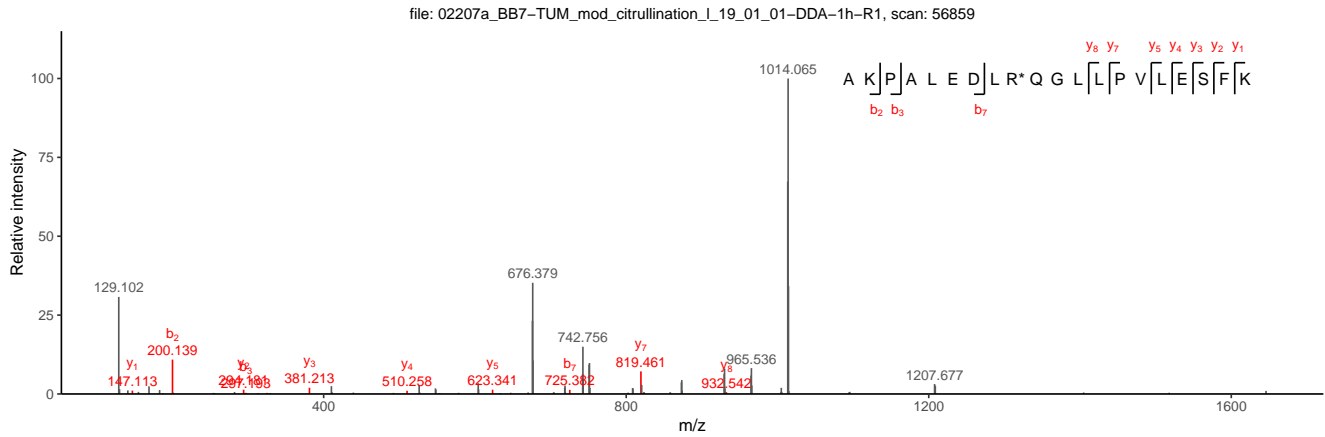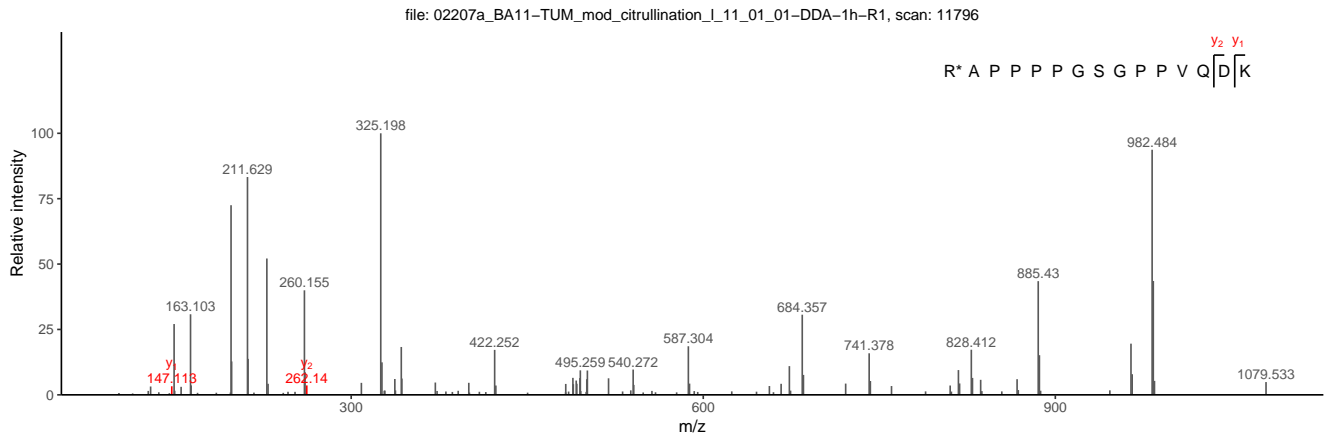

Ground truth: false, ionFinder classification: ambiguous

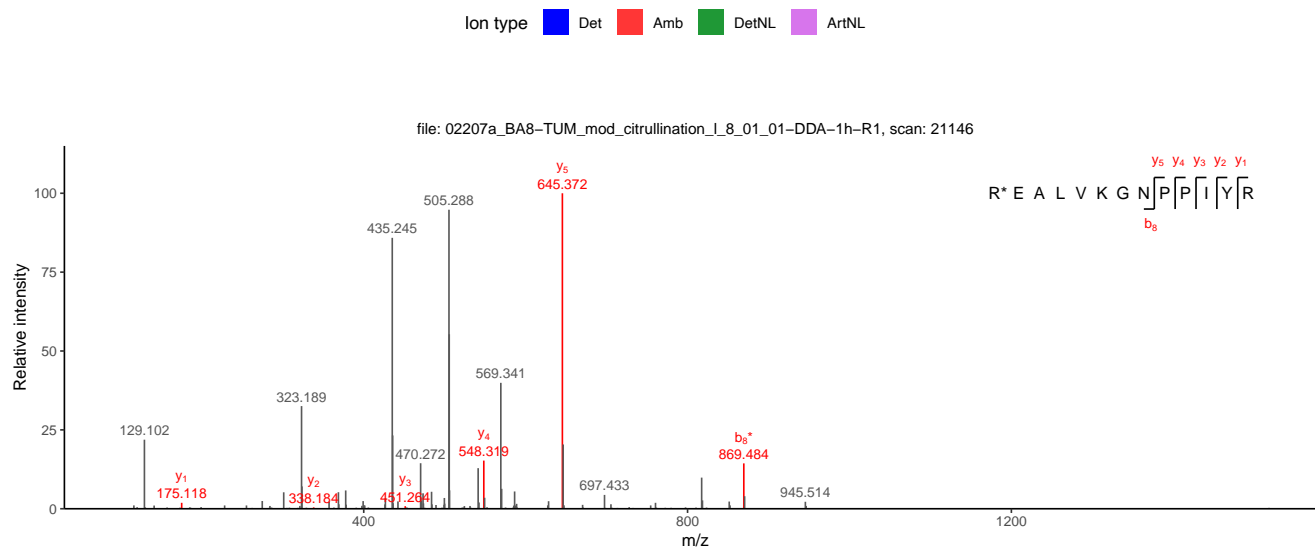

**Figure S6.** MS<sup>2</sup> spectra from 64 PSMs of synthetic spectra which were identified as *ambiguous* by ionFinder and classified as *false* in the ground truth dataset.

Ground truth: false, ionFinder classification: false

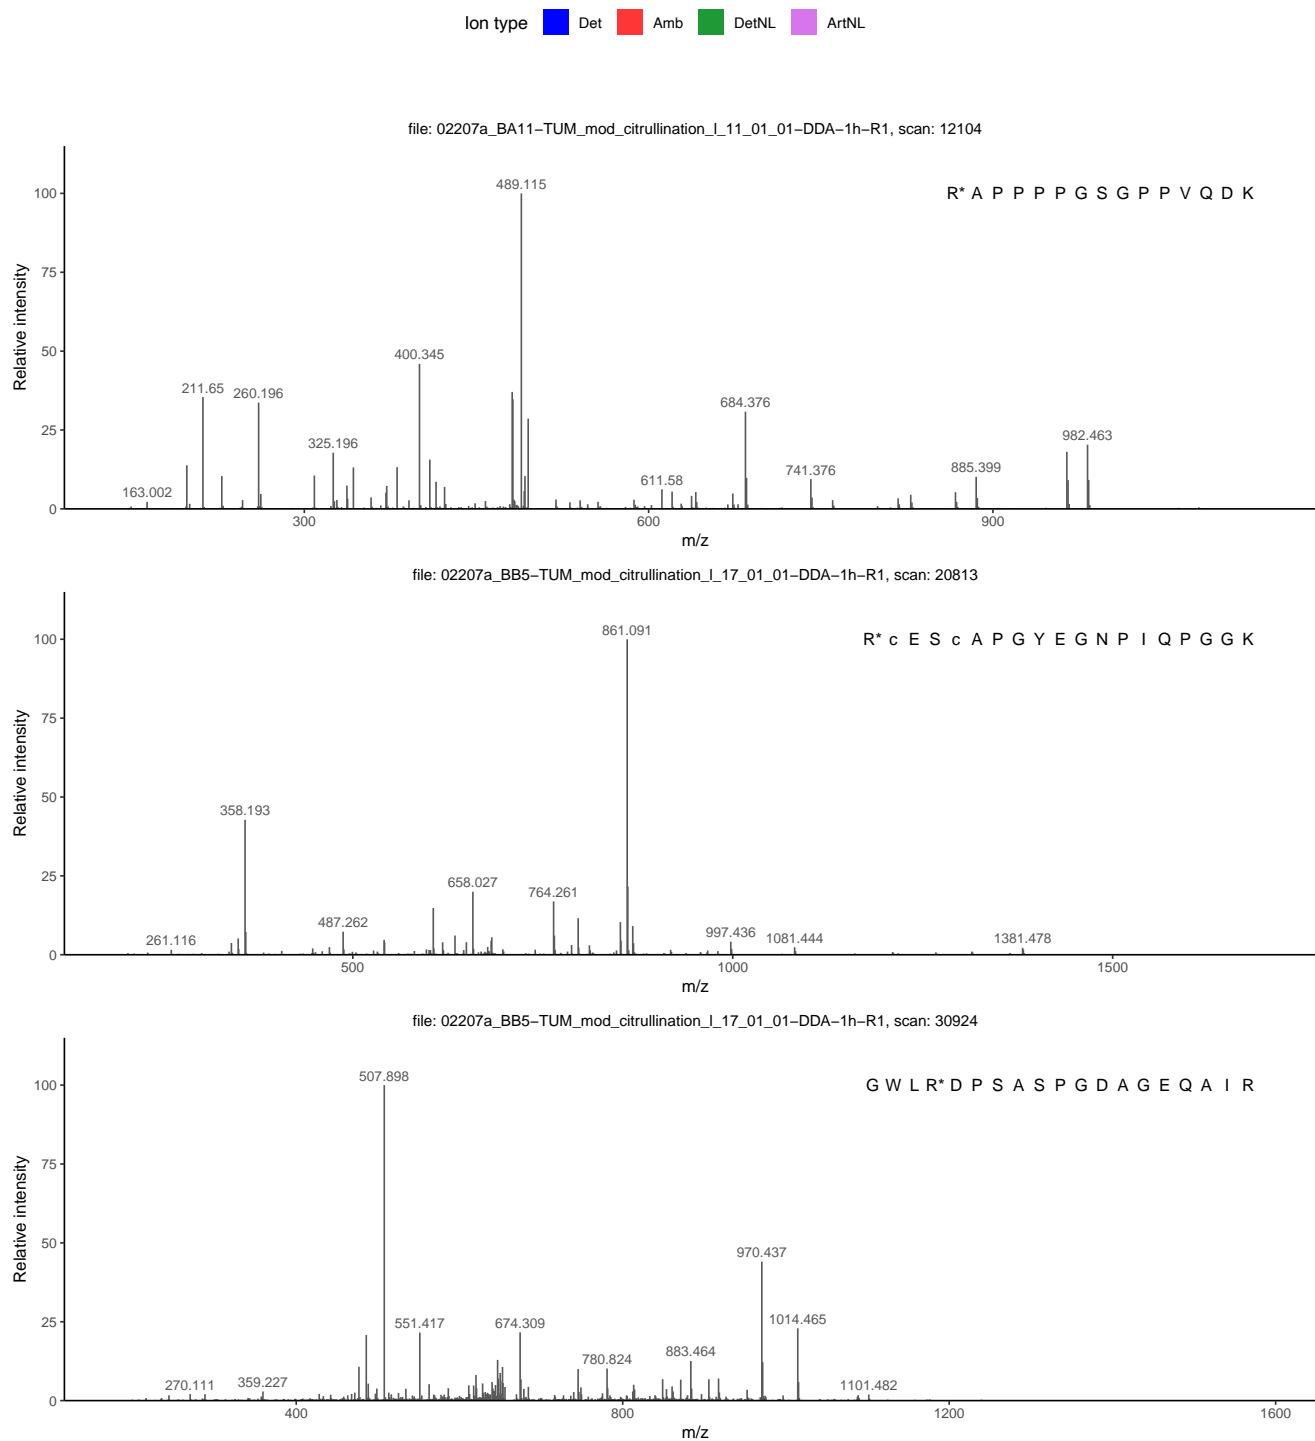

**Figure S7.** MS<sup>2</sup> spectra from 3 PSMs of synthetic spectra which were identified as *false* by ionFinder and classified as *false* in the ground truth dataset.

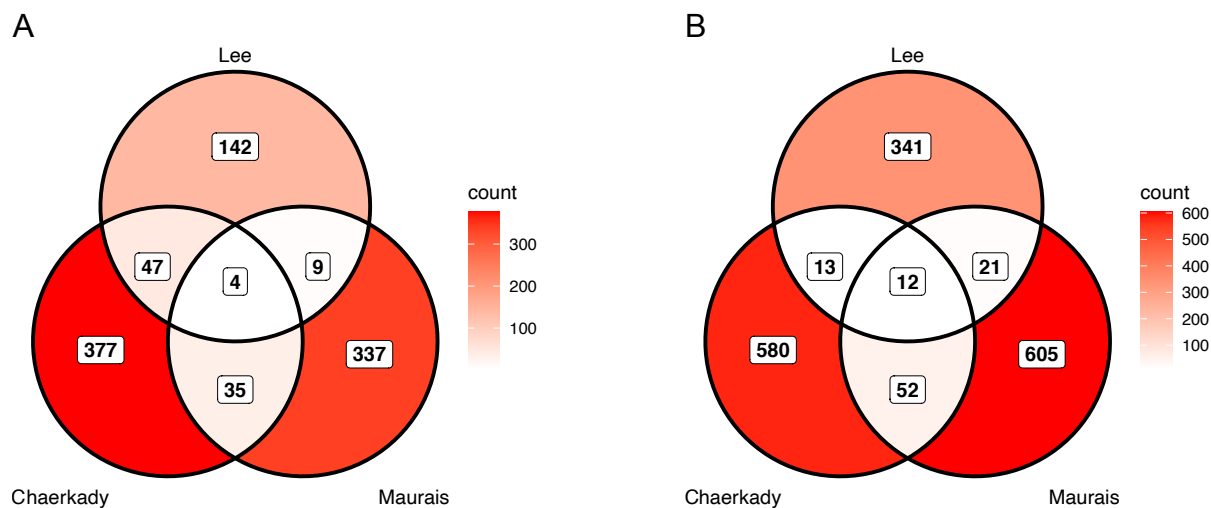

**Figure S8.** Number of overlapping citrulline containing (A) proteins and (B) peptides in this work, Lee *et al.*,<sup>1</sup> and Chaerkady *et al.*<sup>2</sup>

## References

- (1) Lee, C. Y.; Wang, D.; Wilhelm, M.; Zolg, D. P.; Schmidt, T.; Schnatbaum, K.; Reimer, U.; Ponten, F.; Uhlen, M.; Hahne, H.; Kuster, B. Mining the Human Tissue Proteome for Protein Citrullination. *Mol Cell Proteomics* **2018**, *17*, 1378–1391.
- (2) Chaerkady, R.; Zhou, Y.; Delmar, J. A.; Weng, S. H. S.; Wang, J.; Awasthi, S.; Sims, D.; Bowen, M. A.; Yu, W.; Cazares, L. H.; Sims, G. P.; Hess, S. Characterization of Citrullination Sites in Neutrophils and Mast Cells Activated by Ionomycin via Integration of Mass Spectrometry and Machine Learning. *J Proteome Res* **2021**, *20*, 3150–3164.
